# Supplementary material for: Determinants for choosing and adhering to active surveillance for localised prostate cancer: a nationwide population-based study
Source: PubMed Central journal article supplement — BMJ Open. 2019 Dec 23;9(12):e033944. doi: 10.1136/bmjopen-2019-033944 (PMC7008427; doi:10.1136/bmjopen-2019-033944), 2019-12-23
Supplement: bmjopen-2019-033944.draft_revisions.pdf [file bmjopen-2019-033944.draft_revisions.pdf]

# BMJ Open

BMJ Open is committed to open peer review. As part of this commitment we make the peer review history of every article we publish publicly available.

When an article is published we post the peer reviewers' comments and the authors' responses online. We also post the versions of the paper that were used during peer review. These are the versions that the peer review comments apply to.

The versions of the paper that follow are the versions that were submitted during the peer review process. They are not the versions of record or the final published versions. They should not be cited or distributed as the published version of this manuscript.

BMJ Open is an open access journal and the full, final, typeset and author-corrected version of record of the manuscript is available on our site with no access controls, subscription charges or pay-per-view fees (<http://bmjopen.bmj.com>).

If you have any questions on BMJ Open's open peer review process please email [info.bmjopen@bmj.com](mailto:info.bmjopen@bmj.com)

# BMJ Open

## Determinants for choosing and adhering to active surveillance for localized prostate cancer: a nationwide population-based study

|                               |                                                                                                                                                                                                                                                                                                                                                                                                                                   |
|-------------------------------|-----------------------------------------------------------------------------------------------------------------------------------------------------------------------------------------------------------------------------------------------------------------------------------------------------------------------------------------------------------------------------------------------------------------------------------|
| Journal:                      | <i>BMJ Open</i>                                                                                                                                                                                                                                                                                                                                                                                                                   |
| Manuscript ID                 | bmjopen-2019-033944                                                                                                                                                                                                                                                                                                                                                                                                               |
| Article Type:                 | Original research                                                                                                                                                                                                                                                                                                                                                                                                                 |
| Date Submitted by the Author: | 30-Aug-2019                                                                                                                                                                                                                                                                                                                                                                                                                       |
| Complete List of Authors:     | Bergengren, Oskar; Uppsala University, Department of Surgical Sciences Garmo, Hans; Uppsala University, Regional Cancer Center Uppsala Örebro<br>Bratt, Ola; Sahlgrenska Academy, Department of Urology<br>Holmberg, Lars; Uppsala University, Department of Surgical Sciences<br>Johansson, Eva; Uppsala University, Department of Surgical Sciences<br>Bill-Axelsson, Anna; Uppsala University, Department of Surgical Sciences |
| Keywords:                     | Prostate disease < UROLOGY, Urological tumours < UROLOGY, Protocols & guidelines < HEALTH SERVICES ADMINISTRATION & MANAGEMENT                                                                                                                                                                                                                                                                                                    |
|                               |                                                                                                                                                                                                                                                                                                                                                                                                                                   |

SCHOLARONE™  
Manuscripts

1  
2  
3 Determinants for choosing and adhering to active surveillance for localized prostate cancer:  
4  
5 a nationwide population-based study  
6  
7  
8  
9  
10

11  
12 Authors:

13  
14 Oskar Bergengren <sup>a\*</sup>, Hans Garmo <sup>b</sup>, Ola Bratt <sup>c,d</sup>, Lars Holmberg <sup>a</sup>, Eva Johansson <sup>a</sup>,  
15  
16 Anna Bill-Axelsson <sup>a</sup>  
17  
18

19  
20  
21 Affiliations:

22  
23 <sup>a</sup> Uppsala University Hospital, Department of Surgical Sciences, Uppsala, Sweden, <sup>b</sup>  
24 Uppsala University Hospital, Regional Cancer Center Uppsala Örebro, Uppsala, Sweden, <sup>c</sup>  
25 Department of Urology, Sahlgrenska Academy, University of Gothenburg, Gothenburg,  
26 Sweden, <sup>d</sup> Department of Urology, Sahlgrenska University Hospital, Gothenburg, Sweden  
27  
28  
29  
30  
31  
32  
33  
34

35 Contact information:

36  
37 \*Corresponding author. Uppsala University Hospital, Department of Surgical Sciences,  
38 entrance 70, 1tr, 751 85, Uppsala, Sweden. Tel +46 (0)736386324. Fax +46(0)18559159.  
39

40 Email addresses: [oskar.bergengren@akademiska.se](mailto:oskar.bergengren@akademiska.se), [oskar.bergengren@gmail.com](mailto:oskar.bergengren@gmail.com)  
41  
42  
43  
44  
45  
46

47 Keywords: low-risk prostate cancer; active surveillance; choice; adherence  
48  
49  
50

51 Word count of text: 2701  
52

53 Word count of the abstract: 282  
54  
55  
56  
57  
58  
59  
60

## Abstract

Objective: Knowledge about factors influencing choice of and adherence to active surveillance (AS) for prostate cancer (PC) is scarce. We aim to identify which factors most affected choosing and adhering to AS and to quantify their relative importance.

Design, Setting, and Participants: In 2015 we sent a questionnaire to all Swedish men aged  $\leq$  70 years registered in the National Prostate Cancer Register of Sweden who were diagnosed in 2008 with low-risk PC and had undergone prostatectomy, radiotherapy, or started on AS.

Outcome Measurements and Statistical Analysis: Logistic regression was used to calculate odds ratios (OR) with 95% confidence intervals (CI) for factors potentially affecting choice and adherence to AS.

Results: 1288 out of 1720 men (75%) responded, 451 (35%) chose AS and 837 (65%) underwent curative treatment. Of those starting on AS, 238 (53%) diverted to treatment within seven years. Most men (83%) choose AS because “My doctor recommended AS”. Factors associated with choosing AS over treatment were older age (OR 1.81, 95% CI 1.29-2.54), a Charlson Comorbidity Index  $>2$  (OR 1.50, 95% CI 1.06–2.13), being unaccompanied when notified of the cancer diagnosis (OR 1.45, 95% CI 1.11-1.89). Men with a higher PSA at the time of diagnosis were less likely to adhere to AS (OR 0.26, 95% CI 0.10-0.63). The reason for having treatment after initial AS was “the PSA level was rising” in 55% and biopsy findings in 36%.

1  
2  
3 Conclusions: A doctor's recommendation strongly affects which treatment is chosen for men  
4 with low-risk PC. Rising PSA values were the main factor for initiating treatment for men  
5 on AS. These findings need be considered by health-care providers who wish to increase the  
6 uptake of and adherence to AS.  
7  
8  
9  
10  
11  
12  
13  
14  
15  
16

17 Strengths and limitations of this study:

- 18  
19  
20 • The strengths of our study include its population-based design, the high response rate  
21 for a study of its kind, the face-validated study-specific questionnaire, and the direct  
22 questions on reasons for choice and adherence.  
23  
24  
25  
26
- 27 • The retrospective design is a limitation, as the men's experiences during the seven-  
28 year follow-up might have affected their recollection of their experiences.  
29  
30  
31
- 32 • We acknowledge that various selection mechanisms may have affected the men's  
33 choice of treatment and that several important factors therefor could have been  
34 missed.  
35  
36  
37  
38
- 39 • We did not have access to PSA (prostate specific antigen) levels during AS, only at  
40 diagnosis, which limits the possibility to investigate how PSA-monitoring affects  
41 adherence to AS.  
42  
43  
44
- 45 • The study included Swedish men only and the findings might therefore not be  
46 generalizable to other cultural and health-care settings.  
47  
48  
49  
50  
51  
52  
53  
54  
55  
56  
57  
58  
59  
60

## Introduction

A large proportion of men with prostate cancer (PC) are diagnosed with low-risk disease with a long-life expectancy even without curative treatment. Active surveillance (AS) has therefore emerged as the primary strategy for these men to reduce unnecessary treatment <sup>1,2</sup>.

In Sweden, uptake of AS has increased steadily over the past decade and is now 80-90% <sup>3</sup>. However, the proportion of men with low-risk cancer who are on AS varies substantially between and within countries <sup>2,4</sup>. Although notable rising trends are seen in e.g. North America, Australia and Europe <sup>5</sup>, a 2014 survey in Japan noted that roughly half of urologists used AS in < 5% of men with low-risk PC and that only 27% stated that they would want to offer AS more frequently in the future <sup>6</sup>. Additionally, a considerable proportion of men on AS diverge to treatment over time without any clear evidence of disease progression <sup>7,8</sup>.

In a systematic review on choice and adherence to AS, Kinsella et al <sup>9</sup> identifies several factors such as clinician's attitudes, family and social support, and patient education as potential determinants for choice and adherence to AS. However, no grading of these factors' relative importance was made.

We could not identify any previous studies on factors influencing choice of and adherence to AS in a nationwide population-based setting. In this nationwide population-based study, representing a period in time when Sweden experienced a rapid increase in AS <sup>3</sup>, we used a questionnaire to identify which factors most affected choosing and adhering to AS, and to quantify the relative importance of different reasons for this, thereby identifying possibly influenceable determinants to increase the implementation of AS.

## Material and methods

### *Study design and participants*

We identified all men in the National Prostate Cancer Register of Sweden (NPCR) who were diagnosed in 2008 with low-risk PC at age 70 years or younger, had radical prostatectomy, radiotherapy or AS as primary treatment and were alive in 2015. The reason for choosing men diagnosed in 2008 was that we wished to assess reasons for diverting from AS to treatment after several years of AS. The reason for choosing men younger than 70 years with low-risk disease was to avoid getting men in watchful waiting mixed with the active surveillance group.

The NPCR has a capture rate of > 96% compared with the national cancer registry, to which registration is mandatory by law<sup>10</sup>. Low-risk disease was defined as Gleason score 6, prostate-specific antigen (PSA) < 10 ng/ml, and clinical stage T1 or T2.

Between February and October 2015, 1720 men were invited to participate via a letter, in which we presented the study and its purpose. The letter included a questionnaire and an addressed and stamped envelope for reply. The participants could also fill out the questionnaire online by using an individual code which was included in the letter. Men who failed to return the questionnaire were contacted by a research assistant via telephone and were sent a second questionnaire.

The Regional Ethical Review Board at Uppsala University approved of the study.

### *Questionnaire design*

The questionnaire consisted of EPIC-26 and 49 study-specific questions (supplementary file). EPIC-26 is an instrument designed to assess pelvic organ function and bother after PC treatment<sup>11</sup>. The study-specific questions were developed after interviews with men living with PC, and were tested for face validity with one investigator accompanying the men while they completed the questionnaire. Questions not fully understood were changed to achieve clarity. The questionnaire was further validated in an unpublished pilot study among men not included in the present study. Our technique for developing a study-specific questionnaire is based on a one-concept–one-question method producing self-reported outcomes and has been previously described<sup>12-14</sup>. The questionnaire explored mental symptoms, quality of life, and overall satisfaction with care. The questionnaire also assessed experiences at the time of diagnosis and at follow-up, socio-demographics, smoking, alcohol consumption, physical activity, treatments, concurrent diseases (Charlson Comorbidity Index (CCI)<sup>15</sup>), and psychiatric problems (obtained by asking if they suffered from depression and/or any other mental illness).

Factors potentially associated with choice of and adherence to AS was further evaluated by two direct questions. Choice of AS was evaluated by the question “If you were on active surveillance for prostate cancer but later received treatment, or if you are still on active surveillance - which of the following alternative(s) influenced the decision?”. Men had the possibility to grade the following alternatives from “I do not agree at all” to “I completely agree”, “I am/was not particularly worried about the prostate cancer”, “I did not want to risk leaking urine”, “I did not want to risk impairing my sexual function”, “I did not want to risk getting bowel problems”, “I preferred not undergoing any treatment”, “I wanted to



1  
2  
3 postpone any treatment until it was deemed necessary”, “I felt uneasy about the available  
4 treatment strategies (surgery and radiotherapy)” and “My doctor recommended active  
5 surveillance”. Adherence was evaluated by the question “Why was the active surveillance  
6 terminated and treatment initiated?” with the following alternatives where men had the  
7 possibility to choose more than one alternative, “The PSA level was rising”, “The prostate  
8 biopsies showed a more aggressive tumour”, “The initiative was mine and had nothing to  
9 do with the PSA level or prostate biopsies” and “The initiative was my doctor’s and had  
10 nothing to do with the PSA level or prostate biopsies”.  
11  
12  
13  
14  
15  
16  
17  
18  
19  
20  
21  
22  
23  
24

25 *Patient and Public Involvement statement:*  
26  
27  
28  
29

30 Men living with prostate cancer were involved in the study early on as we conducted  
31 individual interviews with a small number of respondents to explore their perspectives on  
32 living with prostate cancer. The study-specific questions were developed after these  
33 interviews. However, men with prostate cancer were not involved in the conduct, analysis of  
34 data or writing the manuscript in other ways.  
35  
36  
37  
38  
39  
40  
41  
42  
43

44 *Data collection, analysis, and statistical analysis*  
45  
46  
47  
48  
49

50 The questionnaires and cancer characteristics data from the NPCR were assembled in a  
51 database. Differences between responders and non-responders were analyzed. To assess  
52 factors associated with the initial choice of treatment, men were grouped by their initial  
53 treatment: curative or AS. To assess factors associated with adherence to AS, responders  
54 were grouped by whether they stayed on AS or diverged to treatment. Statements such as  
55  
56  
57  
58  
59  
60

1  
2  
3 “substantial information” were defined as the highest possible response to that specific  
4  
5 question.  
6  
7

8  
9 Missing data were handled using multiple imputations based on the method of chained  
10  
11 equations<sup>16</sup>. Five imputation data sets were created. The maximum number of imputed  
12  
13 answers were 4%.  
14  
15

16  
17 The analysis of factors associated with choice and adherence to AS was carried out using  
18  
19 logistic regression. A multivariate analysis was performed including age, retirement,  
20  
21 education and CCI and it is these values that are presented. Odds ratios (ORs) with 95%  
22  
23 confidence interval (CI) show the probability of choosing and adhering to AS.  
24  
25  
26  
27  
28  
29

## 30 31 Results

### 32 33 *Patient characteristics*

34  
35  
36  
37 In all, 1288 (75%) of the 1720 invited men responded. Mean age at diagnosis was 63 years  
38  
39 old (range 40–70) (Table 1a).  
40  
41  
42

43  
44 Non-responders were on average one year younger, had lower T-stage and lower PSA, were  
45  
46 more likely to be diagnosed after PSA-testing, and were more likely to be initially managed  
47  
48 with AS (data from the NPCR) (supplementary file).  
49  
50

51  
52 A total of 451 (35%) chose AS and 837 (65%) underwent immediate treatment. Of the men  
53  
54 who initially chose AS, 238 (53%) diverted to treatment within seven years, of whom 70%  
55  
56 did so within the first three years (Table 1b and Figure 1).  
57  
58  
59  
60

1  
2  
3 The vast majority of men primarily consulted either a urologist or a medical oncologist, 18%  
4  
5 consulted both a urologist and a medical oncologist.  
6  
7  
8  
9

10  
11  
12 *Factors associated with choice (Figure 2)*  
13  
14

15  
16 Factors statistically associated with choosing AS over treatment included older age (OR  
17  
18 1.81, 95% CI 1.29-2.54 for men aged <60 yr vs men aged 66–70 yr), a CCI >2 (OR 1.50,  
19  
20 95% CI 1.06–2.13, compared with CCI 0), unaccompanied when being notified of the  
21  
22 diagnosis (OR 1.45, 95% CI 1.11-1.89) and being presented with AS by the treating  
23  
24 physician (OR 9.27, 95% CI 7.04-12.19). Factors statistically associated with not choosing  
25  
26 AS over treatment included whether men were still working (OR 0.69, 95% CI 0.47-1.00)  
27  
28 and/or had a T2 tumor (OR 0.40, 95% CI 0.29-0.56).  
29  
30

31  
32  
33 PSA at diagnosis (OR 0.67, 95% CI 0.40-1.13), time to reflect on treatment options (OR  
34  
35 0.93, 95% CI 0.63-1.39) and whether the men had seen both a urologist and a medical  
36  
37 oncologist (OR 1.13, 95% CI 0.83-1.53) were not statistically significantly associated with  
38  
39 choice.  
40  
41  
42  
43  
44

45 Regarding the direct questions on why the men chose AS (Figure 3) (defined as completely  
46  
47 or largely agreed),  
48

- 49 • 83% “My doctor recommended AS”
- 50
- 51 • 74% “I did not want to risk leaking urine”
- 52
- 53 • 66% “I did not want to risk getting bowel problems”
- 54
- 55 • 64% “I am/was not particularly worried about the prostate cancer”
- 56
- 57 • 62% “I did not want to risk impairing my sexual function”,
- 58
- 59
- 60

- 55% “I wanted to postpone any treatment until it was deemed necessary”
- 49% “I felt uneasy about the available treatment strategies (surgery and radiotherapy)”
- 39% “I preferred not undergoing any treatment”

#### *Factors associated with adherence (Figure 4)*

Men with PC detected during investigation of LUTS (Lower Urinary Tract Symptoms) rather than screening was associated with adhering to AS (OR 1.78, 95% CI 1.16-2.72). Men with a higher PSA at the time of diagnosis (OR 0.26, 95% CI 0.10-0.63) were less likely to adhere to AS.

Regarding the direct question on reasons for diverting to treatment (Figure 5), (defined as completely or largely agreed)

- 55% “the PSA level was rising”
- 36% “the prostate biopsies showed a more aggressive tumor”
- 6% “the initiative was my doctor’s and had nothing to do with the PSA level or prostate biopsies”
- 3% “the initiative was mine and had nothing to do with the PSA level or prostate biopsies”

#### Discussion

1  
2  
3 In this nationwide population-based study, a doctor's recommendation was a strong  
4 predictor for choosing AS, as was patient characteristics such as older age and more  
5 concurrent diseases. Men without anyone accompanying them when they were notified of  
6 the cancer diagnosis were more likely to opt for AS. Regarding adherence to AS, a low PSA  
7 at the time of diagnosis was an important factor, both according to the multivariate analysis  
8 and the direct question. Further, men whose PC was detected during the investigation of  
9 LUTS was more likely to adhere to AS. A unique feature of our study is that we could  
10 quantify the relative importance of different potential reasons for choosing and adhering to  
11 AS, as the men could tick more than one reason and grade its importance.  
12  
13  
14  
15  
16  
17  
18  
19  
20  
21  
22  
23

24  
25 A doctor's recommendation emerged as strongest factor associated with choice. This is  
26 highlighted in our direct question on choice where a doctor's recommendation was the  
27 single strongest predictor for choosing AS with 83% stating that they chose AS because  
28 their doctor recommended it. In fact, more men specified a doctor's recommendation as a  
29 reason for choosing AS than the will to avoid side-effects from treatment. This is in line  
30 with the review article about factors influencing men's choice of and adherence to AS by  
31 Kinsella et al <sup>9</sup>, in which a physician's recommendation was identified as an important  
32 element in choosing AS <sup>17-20</sup>. In light of the evidence from multiple studies for the  
33 importance of the physician's recommendation in favor for choosing AS, the most important  
34 cause of the rapid increase in uptake on AS in Sweden over the past decade<sup>3</sup>, was probably  
35 the Swedish national guidelines' clear recommendation since 2007 of AS for men with low-  
36 risk PC. The recommendation was during this time period less clear in the European and US  
37 recommendations <sup>21,22</sup>, in which AS was mentioned as an alternative to radical treatment  
38 rather than the first choice option.  
39  
40  
41  
42  
43  
44  
45  
46  
47  
48  
49  
50  
51  
52  
53  
54  
55  
56  
57  
58  
59  
60

1  
2  
3 That patient characteristics, such as a higher age, were associated with AS is in line with  
4 previous studies<sup>18,23</sup>. It is possible that some of these men might have diverted from AS to  
5 watchful waiting during the seven years of follow-up as the oldest had reached 77 years by  
6 2015 and might not have been eligible for treatment.  
7  
8  
9

10  
11  
12  
13 On multivariate analysis, being unaccompanied when notified of the cancer diagnosis  
14 predicted choice of AS. This might reflect that these men are more prone to accept the  
15 physician's suggestion if no one else was influencing them to undergo treatment. This  
16 highlights the responsibility of the treating physician, not only directed towards the patients  
17 but also to their significant others, to facilitate an informed treatment decision. A recently  
18 published qualitative study by Mader et al stating that spousal and social support play  
19 important roles in helping men understand and accept their PC diagnosis and chosen care  
20 plan<sup>24</sup>. In our study, 18% of men saw both a urologist and a medical oncologist but this did  
21 not affect the choice of treatment.  
22  
23  
24  
25  
26  
27  
28  
29  
30  
31  
32  
33  
34  
35

36 The participants in our study were diagnosed in 2008. Since then, uptake on AS in Sweden  
37 has steadily increased and reached 74% by 2014<sup>3</sup>. In our study, 35% initially chose AS and  
38 47% were still on AS after seven years follow-up. This is in line with a study by Loeb et al  
39 from 2015 that reported 64 % adherence to AS after five years<sup>25</sup> as well as the PRIAS study  
40 where 50% diverted to treatment within five years, mostly due to protocol-based  
41 reclassification (biopsy-related, changes in T-stage and/or PSA-doubling time)<sup>26</sup>.  
42  
43  
44  
45  
46  
47  
48  
49  
50  
51

52  
53 The main patient reported driver behind diverting to treatment was a rise in PSA. Only 9%  
54 of the men stated that the decision to diverge from AS to treatment was not because of PSA  
55 and/or biopsy results. PSA is considered a poor marker for disease progression, which for  
56  
57  
58  
59  
60

1  
2  
3 example was shown by Fall et al when looking at men with high-risk disease<sup>27</sup>. Several  
4  
5 studies have shown that many men with low-risk PC overestimate the risk of living with an  
6  
7 untreated cancer<sup>28,29</sup>, something that might be further magnified by rising PSA. In the  
8  
9 PIVOT study, no difference in mortality was detected between men who were randomized to  
10  
11 radical prostatectomy or observation after nearly 20 years of follow-up<sup>30</sup>. Roughly half of  
12  
13 the men in our study, who all had low-risk PC diverted to treatment within these seven years  
14  
15 which represents a significant overtreatment. Adherence to AS protocols and additional  
16  
17 methods for follow-up such as MRI<sup>31</sup> and evidence-based triggers for treatment might  
18  
19 reduce the fear of living with untreated cancer and thereby reduce unnecessary treatment.  
20  
21  
22

23  
24  
25 Interestingly, men whose PC was detected during the investigation of LUTS rather than  
26  
27 through screening was more likely to adhere to AS. This finding persisted after adjusting for  
28  
29 age, retirement and CCI. A possible explanation might be a higher degree of anxiety in the  
30  
31 group whose PC was detected through screening rather through the investigation on LUTS,  
32  
33 although we do not have any data to support this. A recently published review article on  
34  
35 psychological distress during cancer-screening<sup>32</sup> indicated that psychological distress,  
36  
37 although low and not a barrier to screening, might be present. There might also be a  
38  
39 motivational difference where men diagnosed through screening actively sought the  
40  
41 investigation of PC and might be more motivated to undergo treatment. Another possible  
42  
43 explanation might be that men diagnosed through the investigation of LUTS might have  
44  
45 received drugs that reduce PSA e.g. Finasteride.  
46  
47  
48  
49  
50  
51  
52  
53  
54

55 The strengths of our study include its population-based design, the high response rate for a  
56  
57 study of its kind, the face-validated study-specific questionnaire, and the direct questions on  
58  
59 reasons for choice and adherence. We acknowledge that various selection mechanisms  
60

1  
2  
3 affected the men's choice of treatment and that several important factors could have been  
4 missed. The retrospective design is a limitation, as the men's experiences during the seven-  
5 year follow-up might have affected their recollection of their experiences. We did not have  
6 access to PSA levels during AS, only at diagnosis, which limits the possibility to investigate  
7 how PSA monitoring affects adherence to AS. Regarding being unaccompanied when  
8 notified of the cancer diagnosis, it's important to acknowledge that while these were  
9 unaccompanied during the appointment, they still might have had support from people in  
10 their support network. The study included Swedish men only and the findings might  
11 therefore not be generalizable to other cultural and health-care settings.  
12  
13  
14  
15  
16  
17  
18  
19  
20  
21  
22  
23  
24  
25  
26  
27

## 28 Conclusions

29  
30  
31 A doctor's recommendation strongly affects which treatment is chosen for men with low-  
32 risk PC. Rising PSA values were the main factor for initiating treatment for men on AS.  
33 These findings need to be considered by health-care providers who wish to increase the  
34 uptake of and adherence to AS.  
35  
36  
37  
38  
39  
40  
41  
42  
43  
44  
45  
46  
47  
48  
49  
50  
51  
52  
53  
54  
55  
56  
57  
58  
59  
60



1  
2  
3 Author contributions: Oskar Bergengren had full access to all the data in the study and  
4  
5 takes responsibility for the integrity of the data and the accuracy of the data analysis.  
6  
7

8  
9  
10 Study concept and design: Bergengren, Garmo, Bratt, Johansson, Bill-Axelsson.  
11

12 Acquisition of data: Bergengren, Johansson, Bill-Axelsson.  
13

14 Analysis and interpretation of data: Bergengren, Garmo, Holmberg, Johansson, Bill-  
15  
16 Axelson.  
17

18  
19 Drafting of the manuscript: Bergengren, Johansson, Bill-Axelsson.  
20

21 Critical revision of the manuscript for important intellectual content: Bergengren, Bratt,  
22  
23 Holmberg, Johansson, Bill-Axelsson.  
24

25  
26 Statistical analysis: Garmo.  
27

28 Obtaining funding: Bill-Axelsson.  
29

30 Administrative, technical, or material support: Bill-Axelsson  
31

32 Supervision: Holmberg, Johansson, Bill-Axelsson.  
33  
34

35 Other: None.  
36  
37

38  
39  
40 Acknowledgements: We wish to thank Ellen Kragsterman for her excellent help with data  
41  
42 collection during this study. We also wish to thank all of the men who answered the  
43  
44 questionnaire.  
45  
46  
47  
48  
49

50 Declaration of interests: Oskar Bergengren certifies that there are no conflicts of interest,  
51  
52 including specific financial interests and relationships and affiliations relevant to the subject  
53  
54 matter or materials discussed in the manuscript.  
55  
56  
57  
58  
59  
60

1  
2  
3 Funding/Support and role of the sponsor: This research was funded by grants from the  
4  
5 Swedish cancer society. The funder had no role in the design and conduct of the study;  
6  
7 collection, management, analysis, and interpretation of data; writing of the manuscript; or  
8  
9 the decision to submit the manuscript for publication.  
10  
11  
12  
13  
14  
15  
16  
17  
18  
19  
20  
21  
22  
23  
24  
25  
26  
27  
28  
29  
30  
31  
32  
33  
34  
35  
36  
37  
38  
39  
40  
41  
42  
43  
44  
45  
46  
47  
48  
49  
50  
51  
52  
53  
54  
55  
56  
57  
58  
59  
60

For peer review only

1. Cooperberg MR. Active Surveillance for Low-Risk Prostate Cancer-An Evolving International Standard of Care. *JAMA Oncol.* 2017;3(10):1398-1399.
2. Cooperberg MR, Carroll PR. Trends in Management for Patients With Localized Prostate Cancer, 1990-2013. *JAMA.* 2015;314(1):80-82.
3. Loeb S, Folkvaljon Y, Curnyn C, Robinson D, Bratt O, Stattin P. Uptake of Active Surveillance for Very-Low-Risk Prostate Cancer in Sweden. *JAMA Oncol.* 2017;3(10):1393-1398.
4. Auffenberg GB, Lane BR, Linsell S, Cher ML, Miller DC. Practice- vs Physician-Level Variation in Use of Active Surveillance for Men With Low-Risk Prostate Cancer: Implications for Collaborative Quality Improvement. *JAMA Surg.* 2017;152(10):978-980.
5. Kinsella N, Helleman J, Bruinsma S, et al. Active surveillance for prostate cancer: a systematic review of contemporary worldwide practices. *Transl Androl Urol.* 2018;7(1):83-97.
6. Mitsuzuka K, Koga H, Sugimoto M, et al. Current use of active surveillance for localized prostate cancer: A nationwide survey in Japan. *Int J Urol.* 2015;22(8):754-759.
7. Bul M, Zhu X, Valdagni R, et al. Active surveillance for low-risk prostate cancer worldwide: the PRIAS study. *Eur Urol.* 2013;63(4):597-603.
8. Tosoian JJ, Mamawala M, Epstein JI, et al. Intermediate and Longer-Term Outcomes From a Prospective Active-Surveillance Program for Favorable-Risk Prostate Cancer. *J Clin Oncol.* 2015;33(30):3379-3385.
9. Kinsella N, Stattin P, Cahill D, et al. Factors Influencing Men's Choice of and Adherence to Active Surveillance for Low-risk Prostate Cancer: A Mixed-method Systematic Review. *Eur Urol.* 2018.
10. Van Hemelrijck M, Wigertz A, Sandin F, et al. Cohort Profile: the National Prostate Cancer Register of Sweden and Prostate Cancer data Base Sweden 2.0. *International journal of epidemiology.* 2013;42(4):956-967.
11. Wei JT, Dunn RL, Litwin MS, Sandler HM, Sanda MG. Development and validation of the expanded prostate cancer index composite (EPIC) for comprehensive assessment of health-related quality of life in men with prostate cancer. *Urology.* 2000;56(6):899-905.
12. Johansson E, Bill-Axelsson A, Holmberg L, et al. Time, symptom burden, androgen deprivation, and self-assessed quality of life after radical prostatectomy or watchful waiting: the Randomized Scandinavian Prostate Cancer Group Study Number 4 (SPCG-4) clinical trial. *Eur Urol.* 2009;55(2):422-430.
13. Steineck G, Helgesen F, Adolfsson J, et al. Quality of life after radical prostatectomy or watchful waiting. *N Engl J Med.* 2002;347(11):790-796.
14. Kreicbergs U, Valdimarsdottir U, Onelov E, Henter JI, Steineck G. Talking about death with children who have severe malignant disease. *N Engl J Med.* 2004;351(12):1175-1186.
15. Charlson M, Szatrowski TP, Peterson J, Gold J. Validation of a combined comorbidity index. *J Clin Epidemiol.* 1994;47(11):1245-1251.
16. Buuren Sv. *Flexible imputation of missing data.* Boca Raton, FL: CRC Press; 2012.
17. Davison BJ, Breckon E. Factors influencing treatment decision making and information preferences of prostate cancer patients on active surveillance. *Patient Education and Counseling.* 2012;87(3):369-374.

18. Hoffman KE, Niu J, Shen Y, et al. Physician variation in management of low-risk prostate cancer: a population-based cohort study. *JAMA internal medicine*. 2014;174(9):1450-1459.
19. Gorin MA, Soloway CT, Eldefrawy A, Soloway MS. Factors That Influence Patient Enrollment in Active Surveillance for Low-risk Prostate Cancer. *Urology*. 2011;77(3):588-591.
20. Scherr KA, Fagerlin A, Hofer T, et al. Physician Recommendations Trump Patient Preferences in Prostate Cancer Treatment Decisions. *Medical Decision Making*. 2017;37(1):56-69.
21. Ganz PA, Barry JM, Burke W, et al. National Institutes of Health State-of-the-Science Conference: role of active surveillance in the management of men with localized prostate cancer. *Annals of internal medicine*. 2012;156(8):591-595.
22. Heidenreich A, Bellmunt J, Bolla M, et al. EAU guidelines on prostate cancer. Part 1: screening, diagnosis, and treatment of clinically localised disease. *Eur Urol*. 2011;59(1):61-71.
23. Maurice MJ, Abouassaly R, Kim SP, Zhu H. Contemporary Nationwide Patterns of Active Surveillance Use for Prostate Cancer. *JAMA internal medicine*. 2015;175(9):1569-1571.
24. Mader EM, Li HH, Lyons KD, et al. Qualitative insights into how men with low-risk prostate cancer choosing active surveillance negotiate stress and uncertainty. *BMC Urology*. 2017;17(1):35.
25. Loeb S, Folkvaljon Y, Makarov DV, Bratt O, Bill-Axelson A, Stattin P. Five-year nationwide follow-up study of active surveillance for prostate cancer. *Eur Urol*. 2015;67(2):233-238.
26. Bokhorst LP, Valdagni R, Rannikko A, et al. A Decade of Active Surveillance in the PRIAS Study: An Update and Evaluation of the Criteria Used to Recommend a Switch to Active Treatment. *Eur Urol*. 2016;70(6):954-960.
27. Fall K, Garmo H, Andren O, et al. Prostate-specific antigen levels as a predictor of lethal prostate cancer. *J Natl Cancer Inst*. 2007;99(7):526-532.
28. Xu J, Janisse J, Ruterbusch JJ, et al. Patients' Survival Expectations With and Without Their Chosen Treatment for Prostate Cancer. *Annals of family medicine*. 2016;14(3):208-214.
29. Kendel F, Helbig L, Neumann K, et al. Patients' perceptions of mortality risk for localized prostate cancer vary markedly depending on their treatment strategy. *International journal of cancer*. 2016;139(4):749-753.
30. Wilt TJ, Jones KM, Barry MJ, et al. Follow-up of Prostatectomy versus Observation for Early Prostate Cancer. *N Engl J Med*. 2017;377(2):132-142.
31. Litwin MS, Tan HJ. The Diagnosis and Treatment of Prostate Cancer: A Review. *Jama*. 2017;317(24):2532-2542.
32. Chad-Friedman E, Coleman S, Traeger LN, et al. Psychological distress associated with cancer screening: A systematic review. *Cancer*. 2017;123(20):3882-3894.

1  
2  
3 Figure legends  
4  
5  
6

7 Table 1a: Demographics, clinical characteristics and potential factors associated with the  
8 choice of treatment by treatment group. AS = Active surveillance; RP/RT = Radical  
9 prostatectomy or Radiotherapy. Numbers are frequencies with percentages in brackets  
10 unless otherwise stated.  
11  
12

13 Table 1b: Demographics, clinical characteristics and potential factors associated with  
14 adherence to active surveillance by treatment group. AS -> AS = Stayed on active  
15 surveillance; AS -> RP/RT = Diverted from active surveillance to Radical prostatectomy or  
16 Radiotherapy. Numbers are frequencies with percentages in brackets unless otherwise  
17 stated.  
18  
19  
20

21 Figure 1: Flow chart showing patients participation and treatment.  
22  
23

24 Figure 2: Forrest plot illustrating choice. OR (Odds ratios) shows the probability of  
25 choosing active surveillance as primary treatment. Adjusted for age, work status,  
26 education, and Charlson comorbidity index.  
27  
28

29 Figure 3: Bar chart illustrating the direct question on why men chose active surveillance as  
30 their primary treatment. Numbers are frequencies with percentages.  
31  
32

33 Figure 4: Forrest plot illustrating adherence. OR (Odds ratios) shows the probability of  
34 adhering to active surveillance. Adjusted for age, work status, education, and Charlson  
35 comorbidity index.  
36  
37  
38

39 Figure 5: Bar chart illustrating the direct question on time spent in active surveillance and  
40 why men terminated active surveillance. Numbers are frequencies with percentages.  
41  
42  
43  
44  
45  
46  
47  
48  
49  
50  
51  
52  
53  
54  
55  
56  
57  
58  
59  
60

| <b>Table 1a - Choice</b>                                       |                                 | AS  |             | RP/RT |             | ALL  |             |
|----------------------------------------------------------------|---------------------------------|-----|-------------|-------|-------------|------|-------------|
| n                                                              |                                 | 451 | '(100.0)    | 837   | '(100.0)    | 1288 | '(100.0)    |
| Age, n (range)                                                 |                                 | 64  | ( 61 - 67 ) | 62    | ( 58 - 65 ) | 63   | ( 59 - 66 ) |
| Marital status n (%)                                           |                                 |     |             |       |             |      |             |
|                                                                | Married or domestic partner     | 367 | '(81.4)     | 701   | '(83.8)     | 1068 | '(82.9)     |
|                                                                | Other                           | 73  | '(16.2)     | 126   | '(15.1)     | 199  | '(15.5)     |
|                                                                | Missing                         | 11  | (2.4)       | 10    | '(1.2)      | 21   | '(1.6)      |
| Children n (%)                                                 |                                 |     |             |       |             |      |             |
|                                                                | No children                     | 36  | '(8.0)      | 70    | '(8.4)      | 106  | '(8.2)      |
|                                                                | Children                        | 401 | '(88.9)     | 747   | '(89.2)     | 1148 | '(89.1)     |
|                                                                | Missing                         | 14  | '(3.1)      | 20    | '(2.4)      | 34   | '(2.6)      |
| Work status, n (%)                                             |                                 |     |             |       |             |      |             |
|                                                                | Not retired                     | 74  | '(16.4)     | 211   | '(25.2)     | 285  | '(22.1)     |
|                                                                | Retired                         | 377 | '(83.6)     | 626   | '(74.8)     | 1003 | '(77.9)     |
|                                                                | Missing                         | 0   | '(0.0)      | 0     | '(0.0)      | 0    | '(0.0)      |
| Education level, n (%)                                         |                                 |     |             |       |             |      |             |
|                                                                | Compulsory school               | 143 | '(31.7)     | 208   | '(24.9)     | 351  | '(27.3)     |
|                                                                | Secondary school                | 166 | '(36.8)     | 347   | '(41.5)     | 513  | '(39.8)     |
|                                                                | University                      | 128 | '(28.4)     | 265   | '(31.7)     | 393  | '(30.5)     |
|                                                                | Missing                         | 14  | '(3.1)      | 17    | '(2.0)      | 31   | '(2.4)      |
| Charlson comorbidity index, n (%)                              |                                 |     |             |       |             |      |             |
|                                                                | 0                               | 129 | '(28.6)     | 282   | '(33.7)     | 411  | '(31.9)     |
|                                                                | 1                               | 142 | '(31.5)     | 296   | '(35.4)     | 438  | '(34.0)     |
|                                                                | 2                               | 85  | '(18.8)     | 144   | '(17.2)     | 229  | '(17.8)     |
|                                                                | >2                              | 95  | '(21.1)     | 115   | '(13.7)     | 210  | '(16.3)     |
| Psychiatric illness, n (%)                                     |                                 |     |             |       |             |      |             |
|                                                                | No                              | 411 | '(91.1)     | 770   | '(92.0)     | 1181 | '(91.7)     |
|                                                                | Yes (Depression/ Other)         | 40  | '(8.9)      | 67    | '(8.0)      | 107  | '(8.3)      |
| T-stage                                                        |                                 |     |             |       |             |      |             |
|                                                                | T1ab                            | 37  | (8.2)       | 16    | '(1.9)      | 53   | '(4.1)      |
|                                                                | T1c                             | 354 | (78.5)      | 599   | '(71.6)     | 953  | '(74.0)     |
|                                                                | T2                              | 60  | (13.3)      | 222   | '(26.5)     | 282  | '(21.9)     |
| PSA value at diagnosis, n (%)                                  |                                 |     |             |       |             |      |             |
|                                                                | 0-3.0                           | 31  | (6.9)       | 41    | '(4.9)      | 72   | '(5.6)      |
|                                                                | 3.1-7.0                         | 325 | (72.1)      | 597   | '(71.3)     | 922  | '(71.6)     |
|                                                                | 7.1-10.0                        | 95  | (21.1)      | 199   | '(23.8)     | 294  | '(22.8)     |
| Method of detection n (%)                                      |                                 |     |             |       |             |      |             |
|                                                                | Screening                       | 228 | (50.6)      | 481   | '(57.5)     | 709  | '(55.0)     |
|                                                                | LUTS                            | 161 | (35.7)      | 216   | '(25.8)     | 377  | '(29.3)     |
|                                                                | Other symptoms                  | 51  | (11.3)      | 109   | '(13.0)     | 160  | '(12.4)     |
|                                                                | Missing                         | 11  | (2.4)       | 31    | '(3.7)      | 42   | '(3.3)      |
| Alone when being notified of the cancer diagnosis n (%)        |                                 |     |             |       |             |      |             |
|                                                                | No                              | 107 | '(23.7)     | 256   | '(30.6)     | 363  | '(28.2)     |
|                                                                | Yes                             | 332 | '(73.6)     | 568   | '(67.9)     | 900  | '(69.9)     |
|                                                                | Missing                         | 12  | '(2.7)      | 13    | '(1.6)      | 25   | '(1.9)      |
| Sufficient time from diagnosis until treatment decision, n (%) |                                 |     |             |       |             |      |             |
|                                                                | No, i wanted a quicker decision | 27  | '(6.0)      | 48    | '(5.7)      | 75   | '(5.8)      |
|                                                                | Yes                             | 363 | '(80.5)     | 739   | '(88.3)     | 1102 | '(85.6)     |
|                                                                | No, i wanted more time to think | 11  | '(2.4)      | 35    | '(4.2)      | 46   | '(3.6)      |
|                                                                | Missing                         | 50  | '(11.1)     | 15    | '(1.8)      | 65   | '(5.0)      |

| <b>Table 1b - Adherence</b>                                    | <b>AS-&gt;AS</b> | <b>AS -&gt; RP/RT</b> | <b>ALL</b>   |
|----------------------------------------------------------------|------------------|-----------------------|--------------|
|                                                                | 213 (100.0)      | 238 (100.0)           | 451 (100.0)  |
| Age, n (range)                                                 | 65 (61 - 68)     | 64 (61 - 66)          | 64 (61 - 67) |
| Marital status n (%)                                           |                  |                       |              |
| Married or domestic partner                                    | 174 (81.7)       | 193 (81.1)            | 367 (81.4)   |
| Other                                                          | 35 (16.4)        | 38 (16.0)             | 73 (16.2)    |
| Missing                                                        | 4 (1.9)          | 7 (2.9)               | 11 (2.4)     |
| Children n (%)                                                 |                  |                       |              |
| No children                                                    | 20 (9.4)         | 16 (6.7)              | 36 (8.0)     |
| Children                                                       | 186 (87.3)       | 215 (90.3)            | 401 (88.9)   |
| Missing                                                        | 7 (3.3)          | 7 (2.9)               | 14 (3.1)     |
| Work status, n (%)                                             |                  |                       |              |
| Not retired                                                    | 33 (15.5)        | 41 (17.2)             | 74 (16.4)    |
| Retired                                                        | 180 (84.5)       | 197 (82.8)            | 377 (83.6)   |
| Missing                                                        | 0 (0.0)          | 0 (0.0)               | 0 (0.0)      |
| Education level, n (%)                                         |                  |                       |              |
| Compulsory school                                              | 65 (30.5)        | 78 (32.8)             | 143 (31.7)   |
| Secondary school                                               | 78 (36.6)        | 88 (37.0)             | 166 (36.8)   |
| University                                                     | 64 (30.0)        | 64 (26.9)             | 128 (28.4)   |
| Missing                                                        | 6 (2.8)          | 8 (3.4)               | 14 (3.1)     |
| Charlson comorbidity index, n (%)                              |                  |                       |              |
| 0                                                              | 56 (26.3)        | 73 (30.7)             | 129 (28.6)   |
| 1                                                              | 70 (32.9)        | 72 (30.3)             | 142 (31.5)   |
| 2                                                              | 36 (16.9)        | 49 (20.6)             | 85 (18.8)    |
| >2                                                             | 51 (23.9)        | 44 (18.5)             | 95 (21.1)    |
| Psychiatric illness, n (%)                                     |                  |                       |              |
| No                                                             | 189 (88.7)       | 222 (93.3)            | 411 (91.1)   |
| Yes (Depression/ Other)                                        | 24 (11.3)        | 16 (6.7)              | 40 (8.9)     |
| T-stage                                                        |                  |                       |              |
| T1ab                                                           | 26 (12.2)        | 11 (4.6)              | 37 (8.2)     |
| T1c                                                            | 156 (73.2)       | 198 (83.2)            | 354 (78.5)   |
| T2                                                             | 31 (14.6)        | 29 (12.2)             | 60 (13.3)    |
| PSA value at diagnosis, n (%)                                  |                  |                       |              |
| 0-3.0                                                          | 23 (10.8)        | 8 (3.4)               | 31 (6.9)     |
| 3.1-7.0                                                        | 151 (70.9)       | 174 (73.1)            | 325 (72.1)   |
| 7.1-10.0                                                       | 39 (18.3)        | 56 (23.5)             | 95 (21.1)    |
| Method of detection n (%)                                      |                  |                       |              |
| Screening                                                      | 94 (44.1)        | 134 (56.3)            | 228 (50.6)   |
| LUTS                                                           | 89 (41.8)        | 72 (30.3)             | 161 (35.7)   |
| Other symptoms                                                 | 22 (10.3)        | 29 (12.2)             | 51 (11.3)    |
| Missing                                                        | 8 (3.8)          | 3 (1.3)               | 11 (2.4)     |
| Alone when being notified of the cancer diagnosis n (%)        |                  |                       |              |
| No                                                             | 44 (20.7)        | 63 (26.5)             | 107 (23.7)   |
| Yes                                                            | 164 (77.0)       | 168 (70.6)            | 332 (73.6)   |
| Missing                                                        | 5 (2.3)          | 7 (2.9)               | 12 (2.7)     |
| Sufficient time from diagnosis until treatment decision, n (%) |                  |                       |              |
| No, i wanted a quicker decision                                | 9 (4.2)          | 18 (7.6)              | 27 (6.0)     |
| Yes                                                            | 152 (71.4)       | 211 (88.7)            | 363 (80.5)   |
| No, i wanted more time to think                                | 5 (2.3)          | 6 (2.5)               | 11 (2.4)     |
| Missing                                                        | 47 (22.1)        | 3 (1.3)               | 50 (11.1)    |

**Figure 1 - Flowchart**

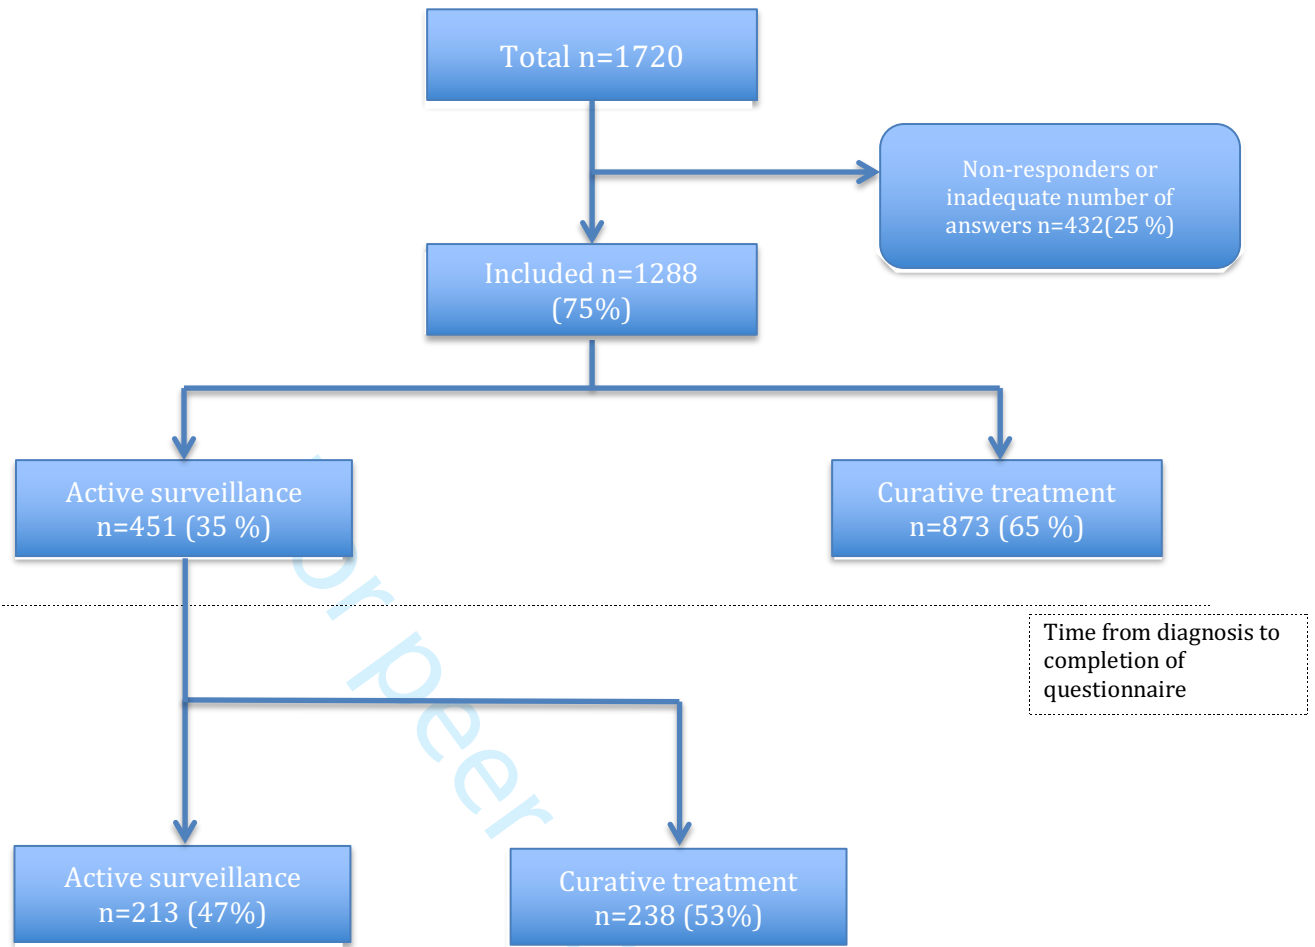



# Figure 2 - Choice

1  
2  
3  
4  
5  
6  
7  
8  
9  
10  
11  
12  
13  
14  
15  
16  
17  
18  
19  
20  
21  
22  
23  
24  
25  
26  
27  
28  
29  
30  
31  
32  
33  
34  
35  
36  
37  
38  
39  
40  
41  
42  
43  
44  
45  
46  
47  
48  
49  
50  
51  
52  
53  
54  
55  
56  
57  
58  
59  
60

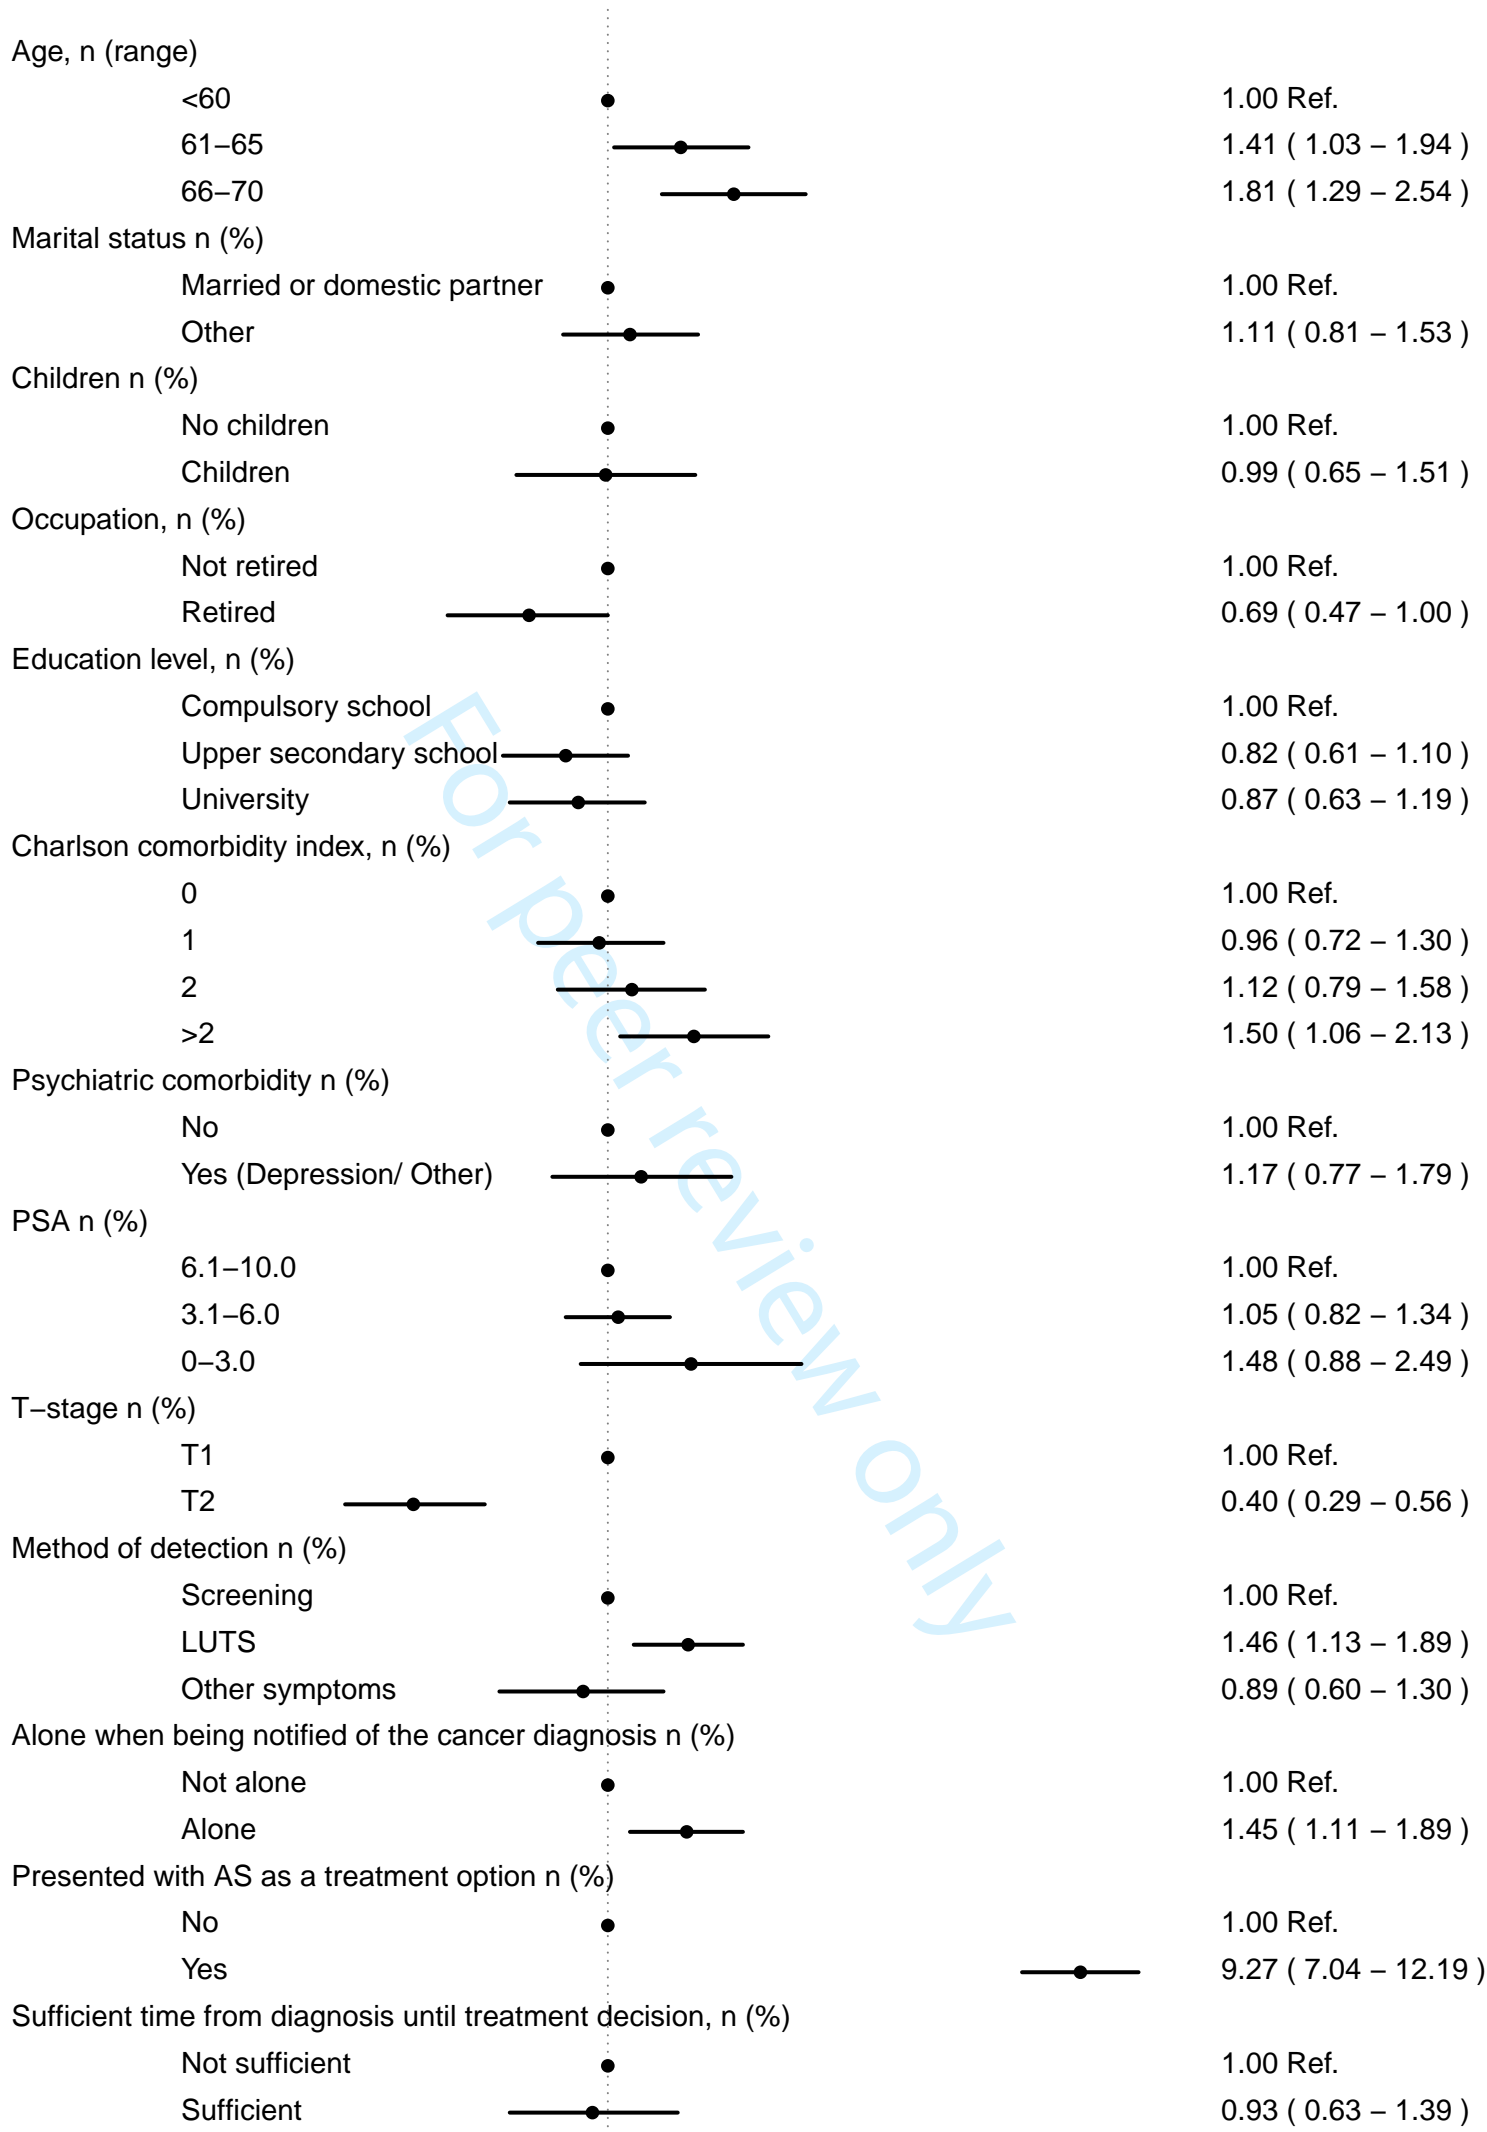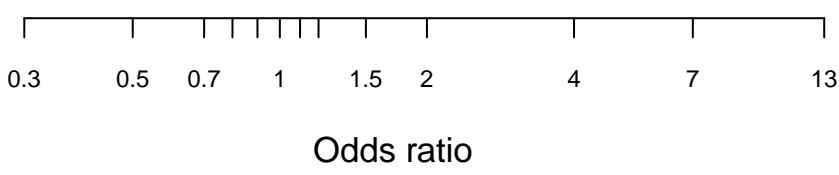

Figure 3 - direct question on why the men chose active surveillance

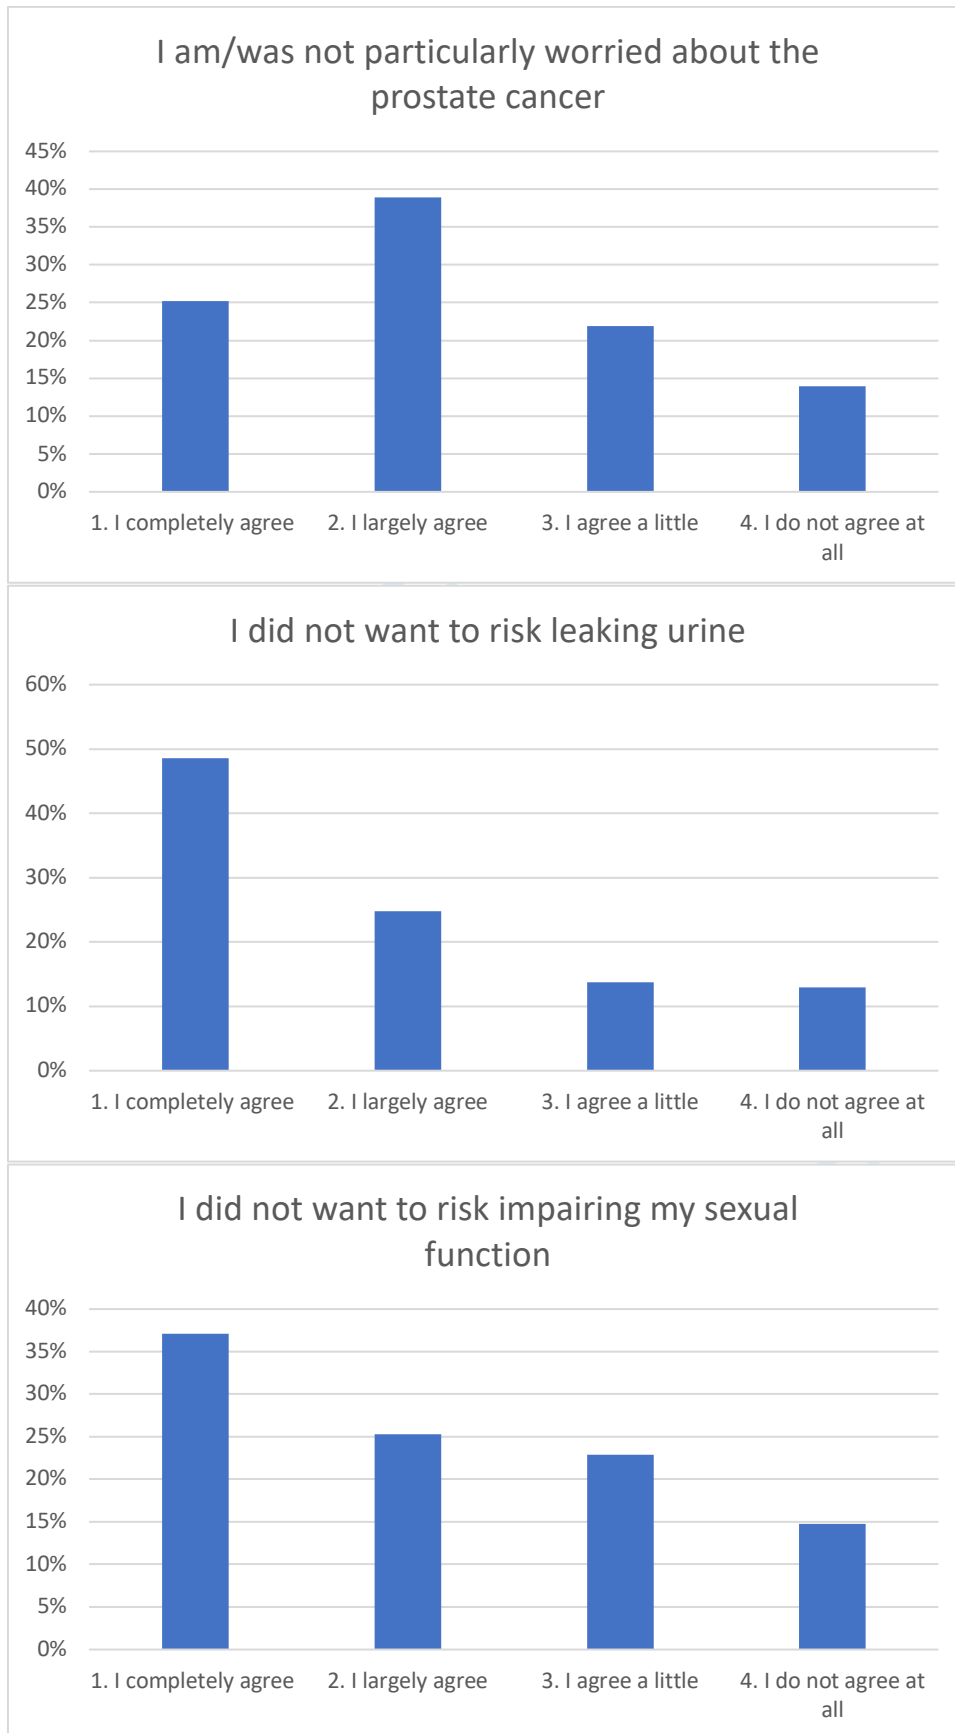

1  
2  
3  
4  
5  
6  
7  
8  
9  
10  
11  
12  
13  
14  
15  
16  
17  
18  
19  
20  
21  
22  
23  
24  
25  
26  
27  
28  
29  
30  
31  
32  
33  
34  
35  
36  
37  
38  
39  
40  
41  
42  
43  
44  
45  
46  
47  
48  
49  
50  
51  
52  
53  
54  
55  
56  
57  
58  
59  
60

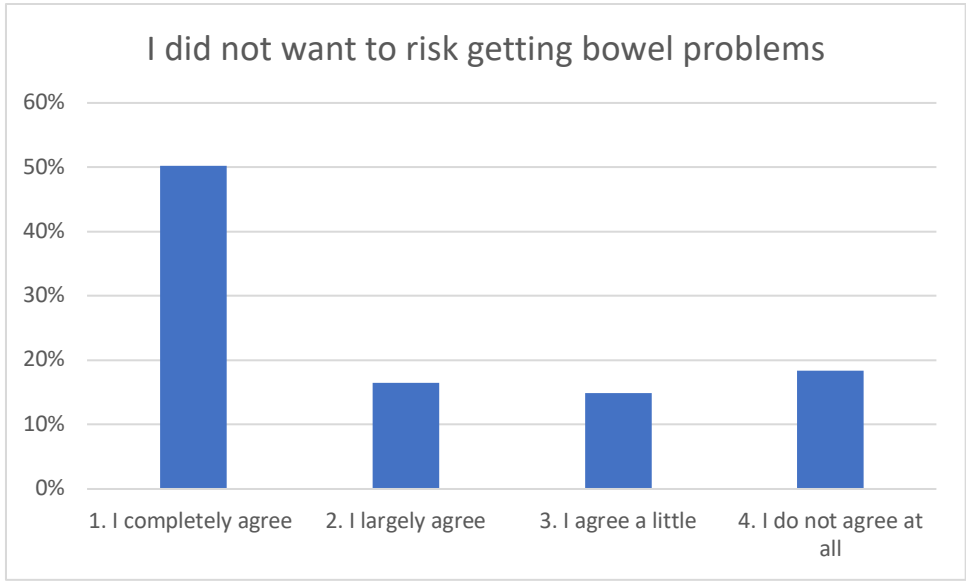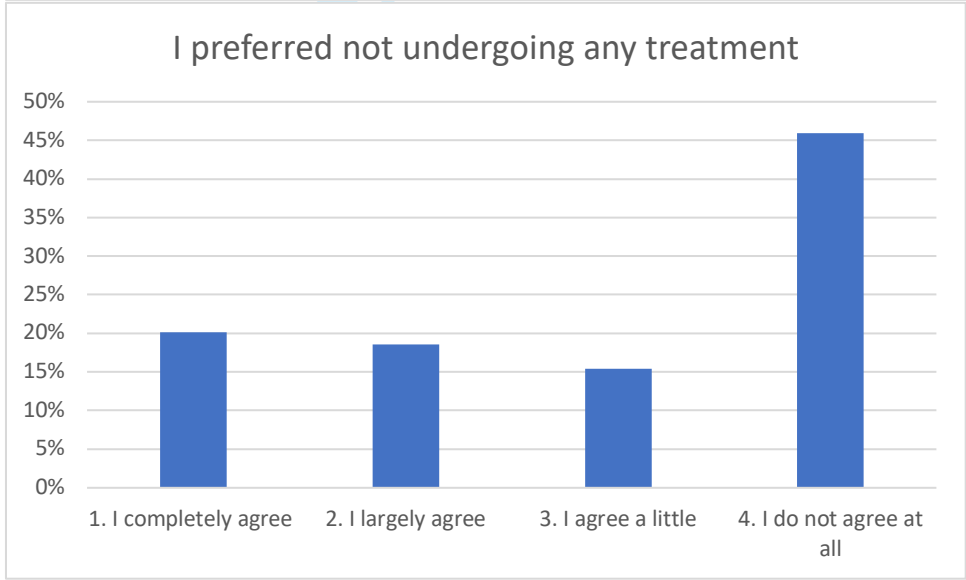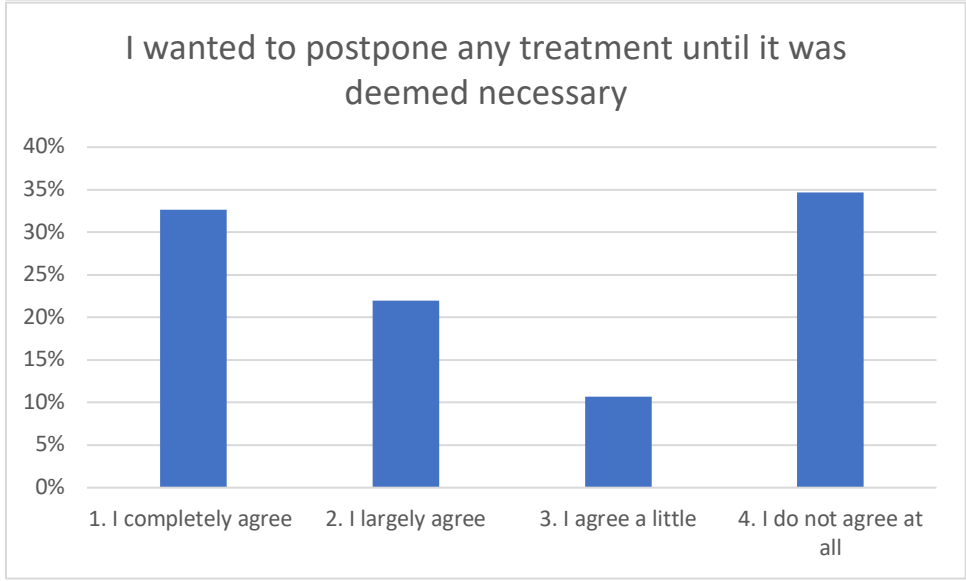

1  
2  
3  
4  
5  
6  
7  
8  
9  
10  
11  
12  
13  
14  
15  
16  
17  
18  
19  
20  
21  
22  
23  
24  
25  
26  
27  
28  
29  
30  
31  
32  
33  
34  
35  
36  
37  
38  
39  
40  
41  
42  
43  
44  
45  
46  
47  
48  
49  
50  
51  
52  
53  
54  
55  
56  
57  
58  
59  
60

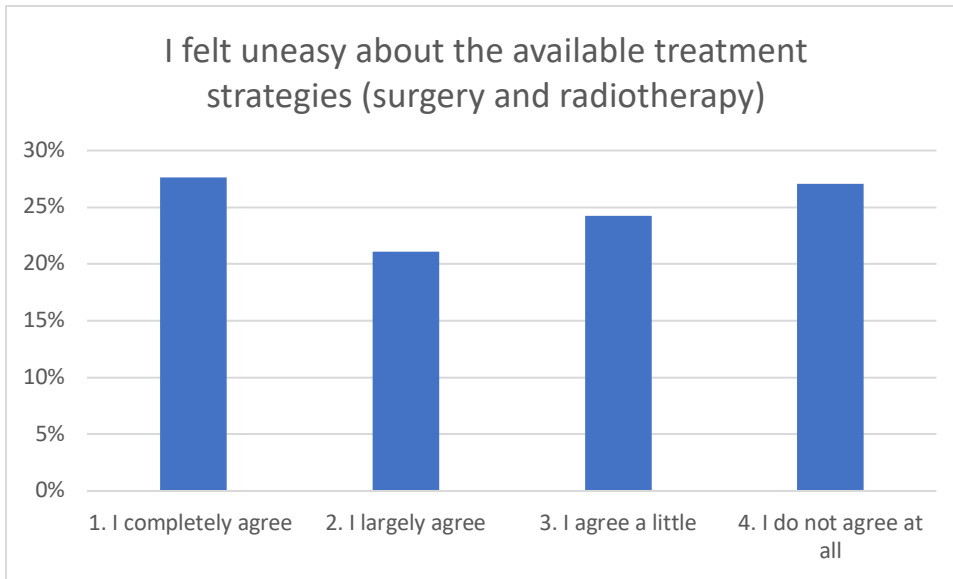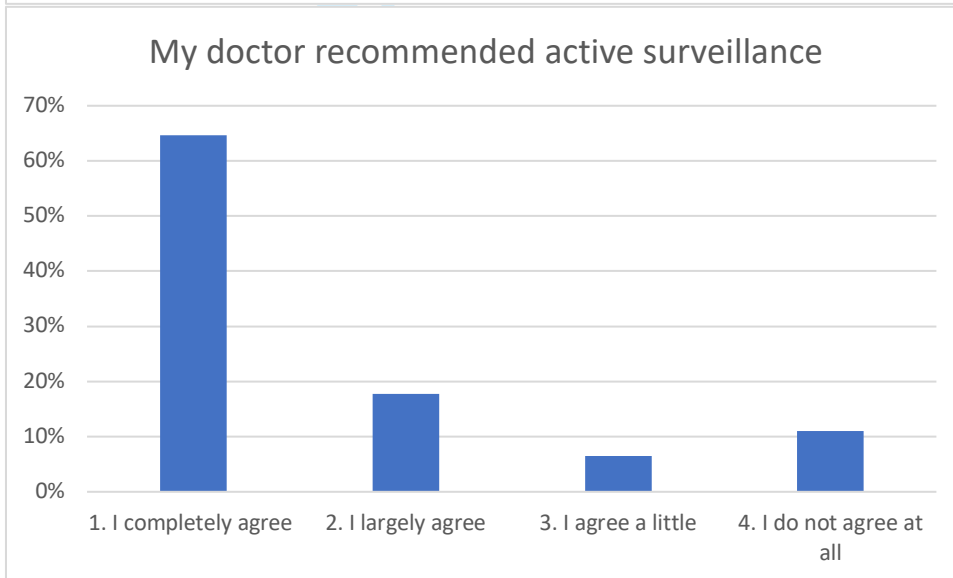

Only

# Figure 4 - Adherence

1  
2  
3  
4  
5  
6  
7  
8  
9  
10  
11  
12  
13  
14  
15  
16  
17  
18  
19  
20  
21  
22  
23  
24  
25  
26  
27  
28  
29  
30  
31  
32  
33  
34  
35  
36  
37  
38  
39  
40  
41  
42  
43  
44  
45  
46  
47  
48  
49  
50  
51  
52  
53  
54  
55  
56  
57  
58  
59  
60

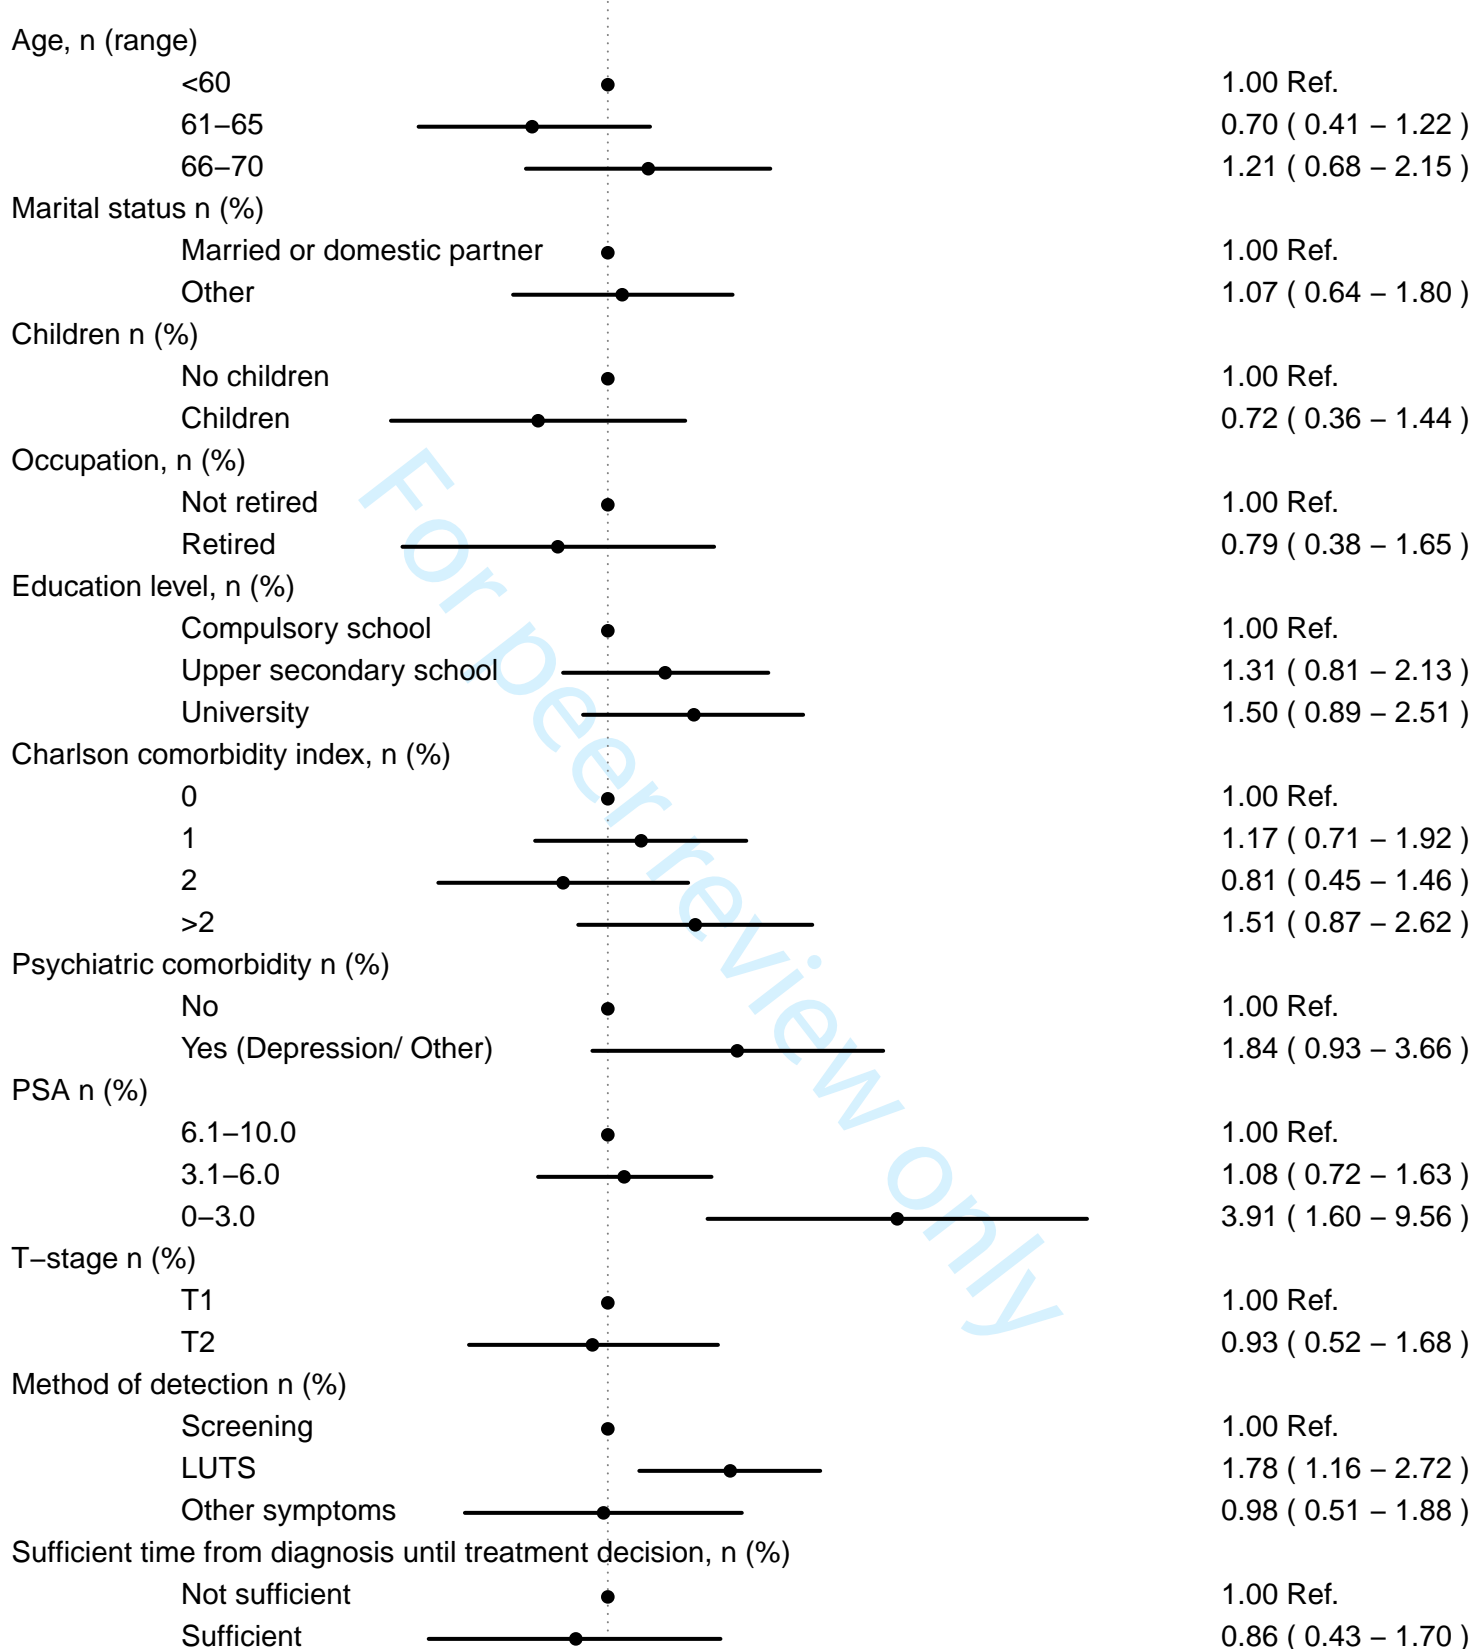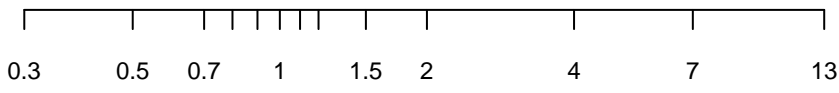

Odds ratio

Figure 5 - direct question on why the men diverted from active surveillance

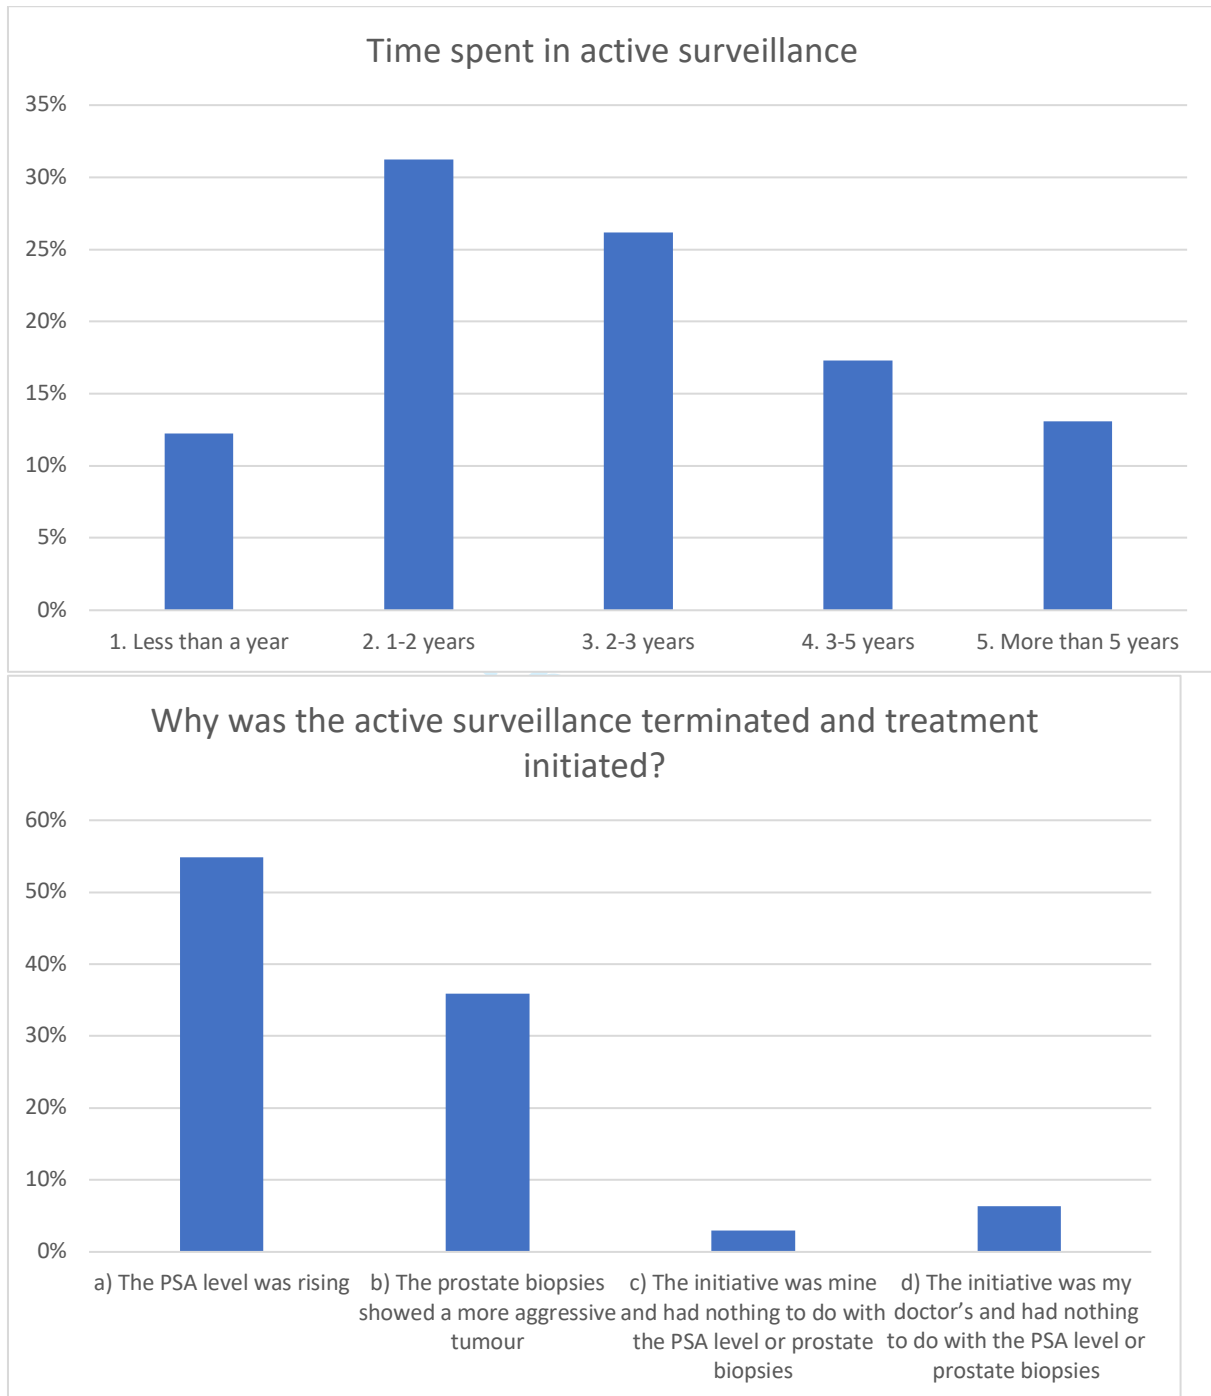

## Health and Quality of Life in Men with Prostate Cancer

Thank you for taking part in this study.

A number of questions follow below (58 questions in part 1 and 17 questions in part 2). Provide the answers that best describe you and your situation. If more than one alternative is possible, the question will indicate as much. Please try to answer all the questions.

PLEASE OBSERVE that the term “active surveillance” is used in this questionnaire.

“Active surveillance” is a conservative treatment strategy for men with low-risk prostate cancer that involves close monitoring of the disease using PSA tests and repeat biopsies. When there are signs of disease progression, the patient receives curative treatment through surgery or radiotherapy. A patient is not in active surveillance if:

- 1) A decision to treat the prostate cancer by surgery or radiotherapy is taken within six months from the prostate cancer diagnosis.
- 2) Being monitored after having received treatment of any kind.

1  
2  
3  
4  
5  
6  
7  
8  
9  
10  
11  
12  
13  
14  
15  
16  
17  
18  
19  
20  
21  
22  
23  
24  
25  
26  
27  
28  
29  
30  
31  
32  
33  
34  
35  
36  
37  
38  
39  
40  
41  
42  
43  
44  
45  
46  
47  
48  
49  
50  
51  
52  
53  
54  
55  
56  
57  
58  
59  
60

## PART I. Demographics and questions about quality of life

### General Questions

---

1. In which year were you born?  
(Give four figures, e.g. 1945)

|  |  |  |  |
|--|--|--|--|
|  |  |  |  |
|--|--|--|--|

2. Are you currently:

- Living with spouse or partner  
 Not in a significant relationship  
 In a significant relationship, but not living together

3. Do you have children?

- No     Yes

4. Do you have grandchildren?

- No     Yes

5. Are you currently:

- Employed  
 Looking for work  
 Retired  
 On long-term sick leave  
 On disability pension

6. What is the highest level of your education?

- Basic education or equivalent  
 Upper secondary, vocational school or equivalent  
 College or university

7. **During the last 4 weeks**, how many hours per have you undertaken at least moderate physical exercise involving an elevated pulse rate (i.e. walking, cycling, swimming, etc.)?

- None  
 Less than 1 hour per week  
 1-3 hours per week  
 More than 3 and up to 7 hours per week  
 More than 7 hours per week

8. What are your smoking habits? (*Only pick one answer*)



- 1  
2  
3  
4  Smoke everyday  
5  Smoke occasionally (less than 1 cigarette per day)  
6  Former smoker  
7  Never smoked  
8  
9

10 9. How many units of alcohol (see example below) do you typically drink on a day when you  
11 drink alcohol?  
12

- 13  0 units of alcohol per week  
14  1-5 units of alcohol per week  
15  6-10 units of alcohol per week  
16  11-20 units of alcohol per week  
17  More than 20 units of alcohol per week  
18

19 In the UK, one unit of alcohol is for example:  
20

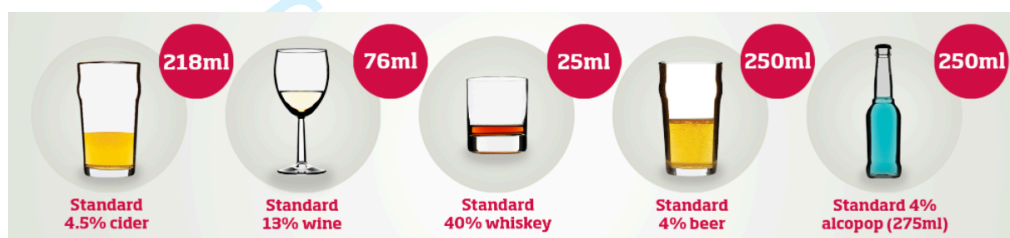

30  
31 10. How tall are you?  
32

33    cm  
34  
35

36  
37 11. How much do you weigh?  
38

39    kg  
40  
41  
42  
43

44 12. Do you have or have you ever had any of the following illnesses? If so, which? (Tick the  
45 appropriate box for each question)  
46

- 47 A. Heart disease (e.g. angina, heart attack, or heart failure)  No  Yes  
48 B. High blood pressure  No  Yes  
49 C. Pains in the legs when walking owing to poor blood circulation No  Yes  
50 D. Lung disease (e.g. asthma, chronic bronchitis, or chronic obstructive  
51 pulmonary disease (COPD))  No  Yes  
52 E. Diabetes  No  Yes  
53 F. Kidney disease  No  Yes  
54  
55  
56  
57  
58  
59  
60

- G. Liver disease  No  Yes
- H. Stroke  No  Yes
- I. Neurological disease (e.g. Parkinson’s disease or MS)  No  Yes
- J. Other type of cancer than prostate cancer (in the last 5 years)  No  Yes
- K. Depression  No  Yes
- L. Other psychological illness  No  Yes
- M. Rheumatism  No  Yes
- N. Paralysis  No  Yes
- O. HIV+ or AIDS  No  Yes

(modified from Charlson Comorbidity index Chaudhry et al 2005)

**Questions About Quality of Life**

Answer the following questions by circling the number that best fits your opinion.

13. **During the last 4 weeks**, what has your quality of life been like?

1-----2-----3-----4-----5-----6-----7  
 No quality of life Best possible quality of life

14. **During the last 4 weeks**, has your life felt meaningful?

1-----2-----3-----4-----5-----6-----7  
 Never All the time

15. **During the last 4 weeks**, what has your physical stamina been like?

1-----2-----3-----4-----5-----6-----7  
 No stamina Best possible stamina

16. **During the last 4 weeks**, what has your mental wellbeing been like?

1-----2-----3-----4-----5-----6-----7  
 No wellbeing Best possible wellbeing

1  
2  
3 **17. During the last 4 weeks**, what has your physical health been like?  
4

5 |-----2-----3-----4-----5-----6-----7  
6 Worst imaginable health Best imaginable health  
7

8  
9 **18. During the last 4 weeks**, what has your self-esteem been like?  
10

11 |-----2-----3-----4-----5-----6-----7  
12 No self-esteem Best imaginable self-esteem  
13  
14

15  
16  
17  
18 **Questions About Depression and Anxiety**  
19

---

20  
21 **19. During the last 4 weeks**, have you felt miserable or depressed?  
22

23 |-----2-----3-----4-----5-----6-----7  
24 Never All the time  
25  
26

27  
28 **20. During the last 4 weeks**, have you experienced worry or anxiety?  
29

30 |-----2-----3-----4-----5-----6-----7  
31 Never All the time  
32  
33

34  
35 **21. During the last 4 weeks**, have you had difficulties sleeping at night?  
36

- 37  No, never  
38  Yes, at least once this month  
39  Yes, at least once a week  
40  Yes, at least 3 times per week  
41  Yes, every night  
42  
43

44  
45 **22. During the last 4 weeks**, have you woken during the night with feelings of worry or anxiety?  
46

- 47  No, never  
48  Yes, at least once this month  
49  Yes, at least once a week  
50  Yes, at least 3 times per week  
51  Yes, every night  
52  
53

54  
55 **23. During the last 4 weeks**, have you taken any preparations to help you sleep?  
56

- 57  No, never  
58  Yes, at least once this month  
59  Yes, at least once a week  
60  Yes, at least 3 times per week

Yes, every evening

24. **During the last 4 weeks**, have you taken any tranquilizers (anti-anxiety medications)?

- No, never
- Yes, at least once this month
- Yes, at least once a week
- Yes, at least 3 times per week
- Yes, every day

25. **During the last 4 weeks**, have you taken any anti-depressives, i.e medication against feeling low or depressed?

No  Yes

**Questions About Information and Decision on Treatment**

---

26. I was informed about my prostate cancer:

- At a meeting in person
- By telephone
- By mail
- In another way, which? \_\_\_\_\_

27. When you were informed about your prostate cancer, were you informed in a good way?  
(Circle the number which best describes you or your situation)

1-----2-----3-----4-----5-----6-----7  
Worst imaginable way Best imaginable way

28. Did you have a friend or relative with you when you were informed about your prostate cancer?

No  Yes

29. How much information have you received from your doctor? (For each row, tick the box that best describes your perception)

|                                                        | No Information           | Little Information       | Quite a lot of Information | A great deal of Information |
|--------------------------------------------------------|--------------------------|--------------------------|----------------------------|-----------------------------|
| A. About prostate cancer – the illness and its course  | <input type="checkbox"/> | <input type="checkbox"/> | <input type="checkbox"/>   | <input type="checkbox"/>    |
| B. About various treatment options for prostate cancer | <input type="checkbox"/> | <input type="checkbox"/> | <input type="checkbox"/>   | <input type="checkbox"/>    |

- 1  
2  
3 C. About side effects of the
- 4 various treatment options
- 5  
6 D. About how the various
- 7 treatments could affect your
- 8 quality of life
- 9  
10

11 30. Which treatment options were suitable to you, according to your perception of the information  
12 you received from your doctor? (Multiple answers are possible)

- 13  
14  Active surveillance (go to checks with PSA tests and MRI examinations, treatment will become  
15 relevant if the cancer becomes more serious)
- 16  Surgical removal of the prostate (radical prostatectomy)
- 17  Radiotherapy
- 18  Other treatment, please specify: \_\_\_\_\_
- 19  
20  
21

22 31. How much did you influence the treatment decision-making?

- 23  
24  Not at all
- 25  A little
- 26  Moderately
- 27  Very much
- 28  
29

30 32. Are you satisfied with how much you were involved in the decision-making between radiotherapy,  
31 surgery or active surveillance?

- 32  
33  No, I wish I had been less involved in the decision-making
- 34  No, I wish I had been more involved in the decision-making
- 35  Yes, I am satisfied with how much I was involved in the decision-making
- 36  
37  
38

39 33. How much time passed between your prostate cancer diagnosis and the treatment decision-making?

- 40  
41  The treatment decision was made right after I received my diagnosis
- 42  1-4 weeks
- 43  2-3 months
- 44  More than 3 months
- 45  
46

47 34. In your opinion, were you given enough time to think before the treatment decision was made?

- 48  
49  No, I wish I had been given less time before the decision was made
- 50  No, I wish I had been given more time before the decision was made
- 51  Yes, I was given enough time before the decision was made
- 52  
53

54 35. In your opinion, did the right amount of time pass between the treatment decision-making and the  
55 treatment start?

- 56  
57  *Not applicable*, I have not received treatment for my prostate cancer
- 58  No, I wish there had been less time between the treatment decision-making and the treatment  
59 start
- 60

- 1  
2  
3  
4  
5  
6  
7  
8  
9  
10  
11  
12  
13  
14  
15  
16  
17  
18  
19  
20  
21  
22  
23  
24  
25  
26  
27  
28  
29  
30  
31  
32  
33  
34  
35  
36  
37  
38  
39  
40  
41  
42  
43  
44  
45  
46  
47  
48  
49  
50  
51  
52  
53  
54  
55  
56  
57  
58  
59  
60
- No, I wish there had been more time between treatment decision and treatment start
- Yes, I am satisfied with the amount of time that passed between treatment decision-making and the treatment start
36. What type of doctor(s) did you discuss your prostate cancer with before the treatment decision was made?
- Urologist (doctor that performs prostate cancer surgery)
- Oncologist (doctor that gives radiotherapy treatment)
- Other type of doctor
37. Do you have access to a nurse navigator?
- No     Yes     I don't know
38. Where have you searched for information about prostate cancer? (NB! Several alternatives possible.)
- I have not searched for information about prostate cancer
- Internet
- Radio
- TV
- Newspapers
- Patient brochures
- Patients association
- Friends or family
- If elsewhere, please specify: \_\_\_\_\_

### Questions About Your Treatment

---

39. Which alternatives below describes your situation? (Cross of one alternative)
- I am currently on active surveillance (i.e. my prostate cancer is closely monitored using PSA tests and repeat biopsies and curative treatment is initiated if the disease progresses)
- I started on active surveillance but have since received curative treatment
- I received treatment directly (within 6 months from my prostate cancer diagnosis)
40. If you have received treatment for prostate cancer, which treatment(s) have you received up to date?
- (NB! Several alternatives are possible. You may, for example, have undergone an operation and radiotherapy, radiotherapy and hormone treatment, or just hormone treatment.)
- I have not had any treatment, I am on active surveillance
- Removal of the whole prostate gland (so-called radical prostatectomy)
- Radiotherapy of the prostate gland
- Hormone treatment in connection with radiotherapy of the prostate gland
- Only hormone treatment by injection (so-called GnRH-analogue)
- Only hormone treatment with pills (e.g. Bicalutamide, or Casodex)

Testicles have been removed by means of operation

41. If you were on active surveillance for prostate cancer but later received treatment, or if you are still on active surveillance - which of the following alternative(s) influenced the decision?

Not applicable, I was never on active surveillance, I received treatment directly

A. I am/was not particularly worried about the prostate cancer

- I completely agree
- I largely agree
- I agree a little
- I do not agree at all

B. I did not want to risk leaking urine

- I completely agree
- I largely agree
- I agree a little
- I do not agree at all

C. I did not want to risk impairing my sexual function

- I completely agree
- I largely agree
- I agree a little
- I do not agree at all

D. I did not want to risk getting bowel problems

- I completely agree
- I largely agree
- I agree a little
- I do not agree at all

E. I preferred not undergoing any treatment

- I completely agree
- I largely agree
- I agree a little
- I do not agree at all

F. I wanted to postpone any treatment until it was deemed necessary

- I completely agree
- I largely agree
- I agree a little
- I do not agree at all

G. I felt uneasy about the available treatment strategies (surgery and radiotherapy)

- I completely agree
- I largely agree
- I agree a little

I do not agree at all

**H. My doctor recommended active surveillance**

- I completely agree  
 I largely agree  
 I agree a little  
 I do not agree at all

42. What do you believe will happen in the future when it comes to your prostate cancer? (Cross of one alternative.)

- I believe that my disease will progress/recur and require treatment within 2 years  
 I believe that my disease will progress/recur and require treatment within 5 years  
 I believe that my disease will progress/recur and require treatment within 10 years  
 I believe that my disease is harmless

43. If you were on active surveillance but then received treatment, please answer the following questions (A to C).

Not applicable, I was never on active surveillance, I received treatment directly

**A. For how long were you on active surveillance?**

- Less than a year  
 1-2 years  
 2-3 years  
 3-5 years  
 More than 5 years

**B. Why was the active surveillance terminated and treatment initiated? (NB! Several alternatives possible.)**

- The PSA level was rising  
 The prostate biopsies showed a more aggressive tumour  
 The initiative was mine and had nothing to do with the PSA level or prostate biopsies  
 The initiative was my doctor's and had nothing to do with the PSA level or prostate biopsies  
 If other reason, please specify: \_\_\_\_\_

**C. If it was your initiative to terminate active surveillance and start treatment but the reason for this was not that the tumour was progressing, what was the reason: (NB! Several alternatives possible.)**

- I was worried  
 My partner was worried  
 My friends were worried  
 I wanted to avoid further biopsies  
 I wanted to avoid the repeated PSA tests  
 I just wanted to have treatment done  
 Other reason



If other reason, please describe it:

---



---

44. Are you worried that your medical problems, if you have any, are related to prostate cancer?

- Not at all
- A little
- Moderately
- Very much

45. Do you believe that you will die from prostate cancer?

- No
- Yes

46. Have you told anyone about your prostate cancer? (NB! Several alternatives possible.)

- I have not told anyone about my prostate cancer
- Partner
- Children
- Grandchildren
- Close friend(s)
- Colleague(s)
- Other person(s)

47. If you are concerned about telling others about your prostate cancer, what are the reasons for this? (NB! Several alternatives possible.)

- Not applicable, I do not hesitate to tell others about the prostate cancer
- It felt too private
- I did not want to worry others
- I believe that people would act differently towards me if I told them about the prostate cancer
- I believe that telling others would affect my career
- Other reason

If other reason, please describe it:

---



---

### Questions About Your Prostate Cancer Checks

---

48. Who monitors your prostate cancer? (NB! Several alternatives possible.)

- Doctor
- Nurse

1  
2  
3  
4  
5 49. When was your last prostate cancer check?  
6

- 7  Less than one week ago  
8  Less than one month ago  
9  Less than three months ago  
10  More than three months ago  
11  
12

13 50. When did you last take a PSA test?  
14

- 15  Less than one week ago  
16  1-4 weeks ago  
17  1-3 months ago  
18  More than three months ago  
19  
20

21 51. When is your next scheduled PSA test?  
22

- 23  In less than one week  
24  In 1-4 weeks  
25  In more than one month  
26  I don't know  
27  
28

29 52. In connection with your prostate cancer check, do you feel reminded of your cancer disease?  
30

- 31  Not at all  
32  A little  
33  Moderately  
34  Very much  
35  
36

37 53. In connections with your prostate cancer check, do you feel worried about what the PSA test will show?  
38

- 39  Not at all  
40  A little  
41  Moderately  
42  Very much  
43  
44

45 54. In connection with your prostate cancer checks, do you feel worried about needing to take new tissue  
46 samples (biopsies) from your prostate (if you are on active surveillance)?  
47  
48

- 49  Not applicable, I have received treatment for prostate cancer  
50  Not at all  
51  A little  
52  Moderately  
53  Very much  
54  
55

56 55. In connection with your prostate cancer check, do you feel worried that your prostate cancer has  
57 spread (metastasized) to a different part of your body?  
58

- 59  Not at all  
60

- 1  
2  
3  
4  
5  
6  
7
- A little
  - Moderately
  - Very much

8  
9  
56. If you feel worried in connection with your prostate cancer check, how long does the worry last?

- 10  
11  
12  
13  
14  
15  
16
- Not applicable, I am not worried before the prostate cancer check
  - Only a day or so, at the time of the prostate cancer check
  - From the day I receive the invitation to the time of the prostate cancer check
  - From before I receive the invitation
  - I am always, more or less, worried

17  
18  
19  
20  
21  
22  
23  
24  
25  
26  
27  
28  
29  
30  
31  
32  
33  
34  
57. Has your prostate cancer diagnosis had an affect on your life style in any way, and if so, in what areas?

- 35  
36  
37  
38  
39  
40  
41  
42  
43  
44  
45  
46  
47  
48  
49  
50  
51  
52  
53  
54  
55  
56  
57  
58  
59  
60
- |    |                                             |                                             |                                    |                                          |
|----|---------------------------------------------|---------------------------------------------|------------------------------------|------------------------------------------|
| A. | Type of food                                | <input type="checkbox"/> I eat less healthy | <input type="checkbox"/> Unchanged | <input type="checkbox"/> I eat healthier |
| B. | Exercise                                    | <input type="checkbox"/> I exercise less    | <input type="checkbox"/> Unchanged | <input type="checkbox"/> I exercise more |
| C. | Interest in social activities/relationships | <input type="checkbox"/> Less               | <input type="checkbox"/> Unchanged | <input type="checkbox"/> More            |
| D. | Interest in religion/philosophy             | <input type="checkbox"/> Less               | <input type="checkbox"/> Unchanged | <input type="checkbox"/> More            |

58. How has prostate cancer affected your economic situation?

- Impaired
- Unchanged
- Improved

## PART II. Questionnaire for Symptoms (EPIC-26)

The next few questions concern problems you may be experiencing.  
(Tick the appropriate box for each question)

I. **Over the past 4 weeks**, how often has your urine leaked?

- More than once a day
- About once a day
- More than once a week
- About once a week
- Rarely or never

2. Which of the following alternatives best describes how well you have been able to control your urinating **during the last 4 weeks?**

- No urinary control whatsoever
- Drip all the time
- Drip a little occasionally
- Full control

3. On average **over the last 4 weeks**, how many incontinence pads or adult diapers have you used per day owing to urine leakage?

- None
- 1 per day
- 2 per day
- 3 or more per day

4. How large a problem, if any, have the following symptoms been **during the last 4 weeks?** (Cross of one alternative for each sub-question.)

|                                              | None                     | Very Little              | Little                   | Moderate                 | Large                    |
|----------------------------------------------|--------------------------|--------------------------|--------------------------|--------------------------|--------------------------|
| A. Dripping or leaking urine                 | <input type="checkbox"/> |
| B. Pain or burning on urination              | <input type="checkbox"/> |
| C. Bleeding with urination                   | <input type="checkbox"/> |
| D. Weak urine stream or incomplete emptying  | <input type="checkbox"/> |
| E. Need to urinate frequently during the day | <input type="checkbox"/> |

5. Overall, how large a problem has urination been for you **during the last 4 weeks?** (Tick the box that best describes your perception.)

- No problem
- Very little problem
- Little problem
- Moderate problem
- Large problem

6. How large a problem, if any, have the following symptoms been for you? (Cross of one alternative for each sub-question.)

None    Very Little    Little    Moderate    Large

- 1  
2  
3 A. Urgent need to empty the bowel  
4 immediately
- 5 B. Need to empty the bowel often
- 6  
7 C. Inability to control the bowel  
8 function
- 9  
10 D. Bloody in faeces
- 11 E. Abdominal/pelvic/rectal pain
- 12  
13  
14

15 7. Overall, how large a problem has your bowel emptying been for you **during the last 4 weeks?** (Tick  
16 the box that best describes your perception.)

- 17  No problem
- 18  Very little problem
- 19  Little problem
- 20  Moderate problem
- 21  Large problem
- 22  
23  
24

25 8. How would you rate each of the following **during the last 4 weeks?** (Cross of one alternative for each  
26 sub-question.)

- |                                                                           | Very Poor<br>to Non-existent | Poor                     | Moderate                 | Good                     | Very Good                |
|---------------------------------------------------------------------------|------------------------------|--------------------------|--------------------------|--------------------------|--------------------------|
| 27<br>28<br>29<br>30<br>31<br>32 A. Your ability to get<br>33 an erection | <input type="checkbox"/>     | <input type="checkbox"/> | <input type="checkbox"/> | <input type="checkbox"/> | <input type="checkbox"/> |
| 34 B. Your ability to achieve<br>35 orgasm (climax)?                      | <input type="checkbox"/>     | <input type="checkbox"/> | <input type="checkbox"/> | <input type="checkbox"/> | <input type="checkbox"/> |
- 36  
37  
38

39 9. How would you describe the usual quality of your erections **during the last 4 weeks?**  
40 (Tick the box that best describes your perception.)

- 41  None at all
- 42  Not firm enough for any sexual activity
- 43  Firm enough for masturbation and foreplay only
- 44  Firm enough for intercourse
- 45  
46  
47

48 10. How would you describe the frequency of your erections **during the last 4 weeks?**  
49 (Tick the box that best describes your perception.)

- 50  I NEVER obtained an erection when desired
- 51  Less than half of the times I wanted an erection
- 52  Around half of the times I wanted an erection
- 53  More than half of the times I wanted an erection
- 54  Whenever I wanted an erection
- 55  
56  
57

58 11. Overall, how would you rate your sexual capability **during the last 4 weeks?**

59  
60

12. (Tick the box that best describes your perception.)

- Very poor
- Poor
- Moderate
- Good
- Very good

12. How large a problem have you had with your sexual capability **during the last 4 weeks?**  
(Tick the box that best describes your perception)

- No problem
- Very little problem
- Little problem
- Moderate problem
- Large problem

13. How large a problem, if any, have the following symptoms been for you during the last 4 weeks?  
(Cross of one alternative for each sub-question)

|                                     | None                     | Very little problem      | Little problem           | Moderate problem         | Large problem            |
|-------------------------------------|--------------------------|--------------------------|--------------------------|--------------------------|--------------------------|
| A. Hot flushes                      | <input type="checkbox"/> |
| B. Tenderness/<br>swelling in chest | <input type="checkbox"/> |
| C. Feeling low                      | <input type="checkbox"/> |
| D. Lacking energy                   | <input type="checkbox"/> |
| E. Change in body weight            | <input type="checkbox"/> |

14. Which of the following medications/sexual aids have you tried and how did they work? (Cross of one alternative for each sub-question)

|                                                                                                      | Have not tried           | Tried but it did not help | Helped but not using it now | Helps and I use it now and then | Helps and I always use it in connection with sexual activity |
|------------------------------------------------------------------------------------------------------|--------------------------|---------------------------|-----------------------------|---------------------------------|--------------------------------------------------------------|
| A. Viagra, Sildenafil, Cialis, Levitra or other medications? If other pills, please give name: _____ | <input type="checkbox"/> | <input type="checkbox"/>  | <input type="checkbox"/>    | <input type="checkbox"/>        | <input type="checkbox"/>                                     |
| B. Bondil (gel in urethra)?                                                                          | <input type="checkbox"/> | <input type="checkbox"/>  | <input type="checkbox"/>    | <input type="checkbox"/>        | <input type="checkbox"/>                                     |
| C. Caverject (injection in the penis)?                                                               | <input type="checkbox"/> | <input type="checkbox"/>  | <input type="checkbox"/>    | <input type="checkbox"/>        | <input type="checkbox"/>                                     |
| D. Vacuum pump?                                                                                      | <input type="checkbox"/> | <input type="checkbox"/>  | <input type="checkbox"/>    | <input type="checkbox"/>        | <input type="checkbox"/>                                     |
| E. Other? If so, please state what: _____                                                            | <input type="checkbox"/> | <input type="checkbox"/>  | <input type="checkbox"/>    | <input type="checkbox"/>        | <input type="checkbox"/>                                     |

15. How long did your erection usually last with the aid of medication/sexual aid during the last 4 weeks?  
(Tick the box that best describes your perception)

- Not relevant, I do not use medications or sexual aids

- Non-existent
- Insufficient for any kind of sexual activity
- Sufficient for masturbation and foreplay
- Sufficient for intercourse

16. **Are you satisfied with your sexual life?**  
*(Circle the number which best describes you or your situation)*

1-----2-----3-----4-----5-----6-----7  
 Not at all satisfied Completely satisfied

**Finally, we would like to ask you**

17. **Overall, how satisfied are you with the medical care you have received as a prostate cancer patient?**  
 (Personalised service, information, etc.)

*(Circle the number which best describes you or your situation)*

1-----2-----3-----4-----5-----6-----7  
 Not satisfied at all Completely satisfied

Is there anything else that you think is important concerning your illness that we have failed to ask about? Please write and tell us!

---



---



---

**THANK YOU FOR YOUR ANSWERS!**

| Appendix 2 – Drop-out analysis            | No questioner data (n=432) |        | Questioner data (n=1288) |        | Received questioner (n=1720) |        | Fisher's exact test |
|-------------------------------------------|----------------------------|--------|--------------------------|--------|------------------------------|--------|---------------------|
| <b>Age, n (%)</b>                         |                            |        |                          |        |                              |        |                     |
| ≤50                                       | 17                         | (3.9)  | 39                       | (3.0)  | 56                           | (3.3)  | 0.003               |
| 51-60                                     | 170                        | (39.4) | 401                      | (31.1) | 571                          | (33.2) |                     |
| 61-65                                     | 128                        | (29.6) | 488                      | (37.9) | 616                          | (35.8) |                     |
| 66-70                                     | 117                        | (27.1) | 360                      | (28.0) | 477                          | (27.7) |                     |
| <b>T-stage, n (%)</b>                     |                            |        |                          |        |                              |        |                     |
| T1a                                       | 25                         | (5.8)  | 45                       | (3.5)  | 70                           | (4.1)  | 0.04                |
| T1b                                       | 6                          | (1.4)  | 8                        | (0.6)  | 14                           | (0.8)  |                     |
| T1c                                       | 320                        | (74.1) | 953                      | (74.0) | 1273                         | (74.0) |                     |
| T2                                        | 81                         | (18.8) | 282                      | (21.9) | 363                          | (21.1) |                     |
| <b>PSA, n (%)</b>                         |                            |        |                          |        |                              |        |                     |
| ≤3                                        | 48                         | (11.1) | 72                       | (5.6)  | 120                          | (7.0)  | <0.001              |
| 3.1-7                                     | 292                        | (67.6) | 922                      | (71.6) | 1214                         | (70.6) |                     |
| 7.1-10                                    | 92                         | (21.3) | 294                      | (22.8) | 386                          | (22.4) |                     |
| <b>Proportion positive cores, n (%)</b>   |                            |        |                          |        |                              |        |                     |
| ≤12.5%                                    | 137                        | (31.7) | 378                      | (29.3) | 515                          | (29.9) | 0.15                |
| 12.5-25%                                  | 107                        | (24.8) | 380                      | (29.5) | 487                          | (28.3) |                     |
| 25.1-50%                                  | 126                        | (29.2) | 359                      | (27.9) | 485                          | (28.2) |                     |
| >50%                                      | 27                         | (6.2)  | 111                      | (8.6)  | 138                          | (8.0)  |                     |
| Missing data                              | 35                         | (8.1)  | 60                       | (4.7)  | 95                           | (5.5)  |                     |
| <b>Mode of detection, n (%)</b>           |                            |        |                          |        |                              |        |                     |
| Screening                                 | 203                        | (47.0) | 709                      | (55.0) | 912                          | (53.0) | 0.024               |
| LUTS                                      | 145                        | (33.6) | 377                      | (29.3) | 522                          | (30.3) |                     |
| Other symptoms                            | 64                         | (14.8) | 160                      | (12.4) | 224                          | (13.0) |                     |
| Missing data                              | 20                         | (4.6)  | 42                       | (3.3)  | 62                           | (3.6)  |                     |
| <b>Treatment according to NPCR, n (%)</b> |                            |        |                          |        |                              |        |                     |
| AS                                        | 202                        | (46.8) | 476                      | (37.0) | 678                          | (39.4) | 0.002               |
| RP                                        | 187                        | (43.3) | 660                      | (51.2) | 847                          | (49.2) |                     |
| RT                                        | 43                         | (10.0) | 152                      | (11.8) | 195                          | (11.3) |                     |



**STROBE 2007 (v4) Statement—Checklist of items that should be included in reports of cohort studies**

| Section/Topic                | Item # | Recommendation                                                                                                                                                                       | Reported on page # |
|------------------------------|--------|--------------------------------------------------------------------------------------------------------------------------------------------------------------------------------------|--------------------|
| <b>Title and abstract</b>    | 1      | (a) Indicate the study’s design with a commonly used term in the title or the abstract                                                                                               | 1                  |
|                              |        | (b) Provide in the abstract an informative and balanced summary of what was done and what was found                                                                                  | 2                  |
| <b>Introduction</b>          |        |                                                                                                                                                                                      |                    |
| Background/rationale         | 2      | Explain the scientific background and rationale for the investigation being reported                                                                                                 | 4                  |
| Objectives                   | 3      | State specific objectives, including any prespecified hypotheses                                                                                                                     | 4                  |
| <b>Methods</b>               |        |                                                                                                                                                                                      |                    |
| Study design                 | 4      | Present key elements of study design early in the paper                                                                                                                              | 4                  |
| Setting                      | 5      | Describe the setting, locations, and relevant dates, including periods of recruitment, exposure, follow-up, and data collection                                                      | 5                  |
| Participants                 | 6      | (a) Give the eligibility criteria, and the sources and methods of selection of participants. Describe methods of follow-up                                                           | 5                  |
|                              |        | (b) For matched studies, give matching criteria and number of exposed and unexposed                                                                                                  |                    |
| Variables                    | 7      | Clearly define all outcomes, exposures, predictors, potential confounders, and effect modifiers. Give diagnostic criteria, if applicable                                             | 5-6                |
| Data sources/<br>measurement | 8*     | For each variable of interest, give sources of data and details of methods of assessment (measurement). Describe comparability of assessment methods if there is more than one group | 7                  |
| Bias                         | 9      | Describe any efforts to address potential sources of bias                                                                                                                            | 7-8                |
| Study size                   | 10     | Explain how the study size was arrived at                                                                                                                                            | 5                  |
| Quantitative variables       | 11     | Explain how quantitative variables were handled in the analyses. If applicable, describe which groupings were chosen and why                                                         | 7                  |
| Statistical methods          | 12     | (a) Describe all statistical methods, including those used to control for confounding                                                                                                | 7                  |
|                              |        | (b) Describe any methods used to examine subgroups and interactions                                                                                                                  | 7                  |
|                              |        | (c) Explain how missing data were addressed                                                                                                                                          | 7                  |
|                              |        | (d) If applicable, explain how loss to follow-up was addressed                                                                                                                       |                    |
|                              |        | (e) Describe any sensitivity analyses                                                                                                                                                |                    |
| <b>Results</b>               |        |                                                                                                                                                                                      |                    |

|                          |     |                                                                                                                                                                                                                                                                                                                                                                                                               |                                 |
|--------------------------|-----|---------------------------------------------------------------------------------------------------------------------------------------------------------------------------------------------------------------------------------------------------------------------------------------------------------------------------------------------------------------------------------------------------------------|---------------------------------|
| Participants             | 13* | (a) Report numbers of individuals at each stage of study—eg numbers potentially eligible, examined for eligibility, confirmed eligible, included in the study, completing follow-up, and analysed<br>(b) Give reasons for non-participation at each stage<br>(c) Consider use of a flow diagram                                                                                                               | 8<br><br>Figure 1               |
| Descriptive data         | 14* | (a) Give characteristics of study participants (eg demographic, clinical, social) and information on exposures and potential confounders<br>(b) Indicate number of participants with missing data for each variable of interest<br>(c) Summarise follow-up time (eg, average and total amount)                                                                                                                | Table 1<br><br>Table 1<br><br>8 |
| Outcome data             | 15* | Report numbers of outcome events or summary measures over time                                                                                                                                                                                                                                                                                                                                                | 8-10                            |
| Main results             | 16  | (a) Give unadjusted estimates and, if applicable, confounder-adjusted estimates and their precision (eg, 95% confidence interval). Make clear which confounders were adjusted for and why they were included<br>(b) Report category boundaries when continuous variables were categorized<br>(c) If relevant, consider translating estimates of relative risk into absolute risk for a meaningful time period | 7-10                            |
| Other analyses           | 17  | Report other analyses done—eg analyses of subgroups and interactions, and sensitivity analyses                                                                                                                                                                                                                                                                                                                | 8-10                            |
| <b>Discussion</b>        |     |                                                                                                                                                                                                                                                                                                                                                                                                               |                                 |
| Key results              | 18  | Summarise key results with reference to study objectives                                                                                                                                                                                                                                                                                                                                                      | 10                              |
| <b>Limitations</b>       |     |                                                                                                                                                                                                                                                                                                                                                                                                               |                                 |
| Interpretation           | 20  | Give a cautious overall interpretation of results considering objectives, limitations, multiplicity of analyses, results from similar studies, and other relevant evidence                                                                                                                                                                                                                                    | 10-13                           |
| Generalisability         | 21  | Discuss the generalisability (external validity) of the study results                                                                                                                                                                                                                                                                                                                                         | 13                              |
| <b>Other information</b> |     |                                                                                                                                                                                                                                                                                                                                                                                                               |                                 |
| Funding                  | 22  | Give the source of funding and the role of the funders for the present study and, if applicable, for the original study on which the present article is based                                                                                                                                                                                                                                                 | 15-16                           |

\*Give information separately for cases and controls in case-control studies and, if applicable, for exposed and unexposed groups in cohort and cross-sectional studies.

**Note:** An Explanation and Elaboration article discusses each checklist item and gives methodological background and published examples of transparent reporting. The STROBE checklist is best used in conjunction with this article (freely available on the Web sites of PLoS Medicine at <http://www.plosmedicine.org/>, Annals of Internal Medicine at <http://www.annals.org/>, and Epidemiology at <http://www.epidem.com/>). Information on the STROBE Initiative is available at [www.strobe-statement.org](http://www.strobe-statement.org).

# BMJ Open

## Determinants for choosing and adhering to active surveillance for localized prostate cancer: a nationwide population-based study

|                                 |                                                                                                                                                                                                                                                                                                                                                                                                                                   |
|---------------------------------|-----------------------------------------------------------------------------------------------------------------------------------------------------------------------------------------------------------------------------------------------------------------------------------------------------------------------------------------------------------------------------------------------------------------------------------|
| Journal:                        | <i>BMJ Open</i>                                                                                                                                                                                                                                                                                                                                                                                                                   |
| Manuscript ID                   | bmjopen-2019-033944.R1                                                                                                                                                                                                                                                                                                                                                                                                            |
| Article Type:                   | Original research                                                                                                                                                                                                                                                                                                                                                                                                                 |
| Date Submitted by the Author:   | 05-Nov-2019                                                                                                                                                                                                                                                                                                                                                                                                                       |
| Complete List of Authors:       | Bergengren, Oskar; Uppsala University, Department of Surgical Sciences Garmo, Hans; Uppsala University, Regional Cancer Center Uppsala Örebro<br>Bratt, Ola; Sahlgrenska Academy, Department of Urology<br>Holmberg, Lars; Uppsala University, Department of Surgical Sciences<br>Johansson, Eva; Uppsala University, Department of Surgical Sciences<br>Bill-Axelsson, Anna; Uppsala University, Department of Surgical Sciences |
| <b>Primary Subject Heading</b>: | Urology                                                                                                                                                                                                                                                                                                                                                                                                                           |
| Secondary Subject Heading:      | Oncology                                                                                                                                                                                                                                                                                                                                                                                                                          |
| Keywords:                       | Prostate disease < UROLOGY, Urological tumours < UROLOGY, Protocols & guidelines < HEALTH SERVICES ADMINISTRATION & MANAGEMENT                                                                                                                                                                                                                                                                                                    |
|                                 |                                                                                                                                                                                                                                                                                                                                                                                                                                   |

SCHOLARONE™  
Manuscripts

1  
2  
3 Determinants for choosing and adhering to active surveillance for localized prostate cancer:  
4  
5 a nationwide population-based study  
6  
7  
8  
9  
10

11  
12 Authors:

13  
14 Oskar Bergengren <sup>a\*</sup>, Hans Garmo <sup>b</sup>, Ola Bratt <sup>c,d</sup>, Lars Holmberg <sup>a</sup>, Eva Johansson <sup>a</sup>,  
15  
16 Anna Bill-Axelsson <sup>a</sup>  
17  
18

19  
20  
21 Affiliations:

22  
23 <sup>a</sup> Uppsala University Hospital, Department of Surgical Sciences, Uppsala, Sweden, <sup>b</sup>  
24 Uppsala University Hospital, Regional Cancer Center Uppsala Örebro, Uppsala, Sweden, <sup>c</sup>  
25 Department of Urology, Sahlgrenska Academy, University of Gothenburg, Gothenburg,  
26 Sweden, <sup>d</sup> Department of Urology, Sahlgrenska University Hospital, Gothenburg, Sweden  
27  
28  
29  
30  
31  
32  
33  
34

35 Contact information:

36  
37 \*Corresponding author. Uppsala University Hospital, Department of Surgical Sciences,  
38 entrance 70, 1tr, 751 85, Uppsala, Sweden. Tel +46 (0)736386324. Fax +46(0)18559159.  
39  
40 Email addresses: [oskar.bergengren@akademiska.se](mailto:oskar.bergengren@akademiska.se), [oskar.bergengren@gmail.com](mailto:oskar.bergengren@gmail.com)  
41  
42  
43  
44  
45  
46

47 Keywords: low-risk prostate cancer; active surveillance; choice; adherence  
48  
49  
50

51 Word count of text: 2701

52  
53 Word count of the abstract: 282  
54  
55  
56  
57  
58  
59  
60

## Abstract

Objective: Knowledge about factors influencing choice of and adherence to active surveillance (AS) for prostate cancer (PC) is scarce. We aim to identify which factors most affected choosing and adhering to AS and to quantify their relative importance.

Design, Setting, and Participants: In 2015 we sent a questionnaire to all Swedish men aged  $\leq$  70 years registered in the National Prostate Cancer Register of Sweden who were diagnosed in 2008 with low-risk PC and had undergone prostatectomy, radiotherapy, or started on AS.

Outcome Measurements and Statistical Analysis: Logistic regression was used to calculate odds ratios (OR) with 95% confidence intervals (CI) for factors potentially affecting choice and adherence to AS.

Results: 1288 out of 1720 men (75%) responded, 451 (35%) chose AS and 837 (65%) underwent curative treatment. Of those starting on AS, 238 (53%) diverted to treatment within seven years. Most men (83%) choose AS because “My doctor recommended AS”. Factors associated with choosing AS over treatment were older age (OR 1.81, 95% CI 1.29-2.54), a Charlson Comorbidity Index  $>2$  (OR 1.50, 95% CI 1.06–2.13), being unaccompanied when notified of the cancer diagnosis (OR 1.45, 95% CI 1.11-1.89). Men with a higher PSA at the time of diagnosis were less likely to adhere to AS (OR 0.26, 95% CI 0.10-0.63). The reason for having treatment after initial AS was “the PSA level was rising” in 55% and biopsy findings in 36%.

1  
2  
3 Conclusions: A doctor's recommendation strongly affects which treatment is chosen for men  
4 with low-risk PC. Rising PSA values were the main factor for initiating treatment for men  
5 on AS. These findings need be considered by health-care providers who wish to increase the  
6 uptake of and adherence to AS.  
7  
8  
9  
10  
11  
12  
13  
14  
15  
16

17 Strengths and limitations of this study:  
18  
19

- 20 • The strengths of our study include its population-based design, the high response rate  
21 for a study of its kind, the face-validated study-specific questionnaire, and the direct  
22 questions on reasons for choice and adherence.  
23  
24  
25  
26
- 27 • The retrospective design is a limitation, as the men's experiences during the seven-  
28 year follow-up might have affected their recollection of their experiences.  
29  
30  
31
- 32 • We acknowledge that various selection mechanisms may have affected the men's  
33 choice of treatment and that several important factors therefor could have been  
34 missed.  
35  
36  
37  
38
- 39 • We did not have access to PSA (prostate specific antigen) levels during AS, only at  
40 diagnosis, which limits the possibility to investigate how PSA-monitoring affects  
41 adherence to AS.  
42  
43  
44
- 45 • The study included Swedish men only and the findings might therefore not be  
46 generalizable to other cultural and health-care settings.  
47  
48  
49  
50  
51  
52  
53  
54  
55  
56  
57  
58  
59  
60

## Introduction

A large proportion of men with prostate cancer (PC) are diagnosed with low-risk disease with a long-life expectancy even without curative treatment. Active surveillance (AS) has therefore emerged as the primary strategy for these men to reduce unnecessary treatment <sup>1,2</sup>.

In Sweden, uptake of AS has increased steadily over the past decade and is now 80-90% <sup>3</sup>. However, the proportion of men with low-risk cancer who are on AS varies substantially between and within countries <sup>2,4</sup>. Although notable rising trends are seen in e.g. North America, Australia and Europe <sup>5</sup>, a 2014 survey in Japan noted that roughly half of urologists used AS in < 5% of men with low-risk PC and that only 27% stated that they would want to offer AS more frequently in the future <sup>6</sup>. Additionally, a considerable proportion of men on AS diverge to treatment over time without any clear evidence of disease progression <sup>7,8</sup>.

In a systematic review on choice and adherence to AS, Kinsella et al <sup>9</sup> identifies several factors such as clinician's attitudes, family and social support, and patient education as potential determinants for choice and adherence to AS. However, no grading of these factors' relative importance was made.

We could not identify any previous studies on factors influencing choice of and adherence to AS in a nationwide population-based setting. In this nationwide population-based study, representing a period in time when Sweden experienced a rapid increase in AS <sup>3</sup>, we used a questionnaire to identify which factors most affected choosing and adhering to AS, and to quantify the relative importance of different reasons for this, thereby identifying possibly influenceable determinants to increase the implementation of AS.

## Material and methods

### *Study design and participants*

We identified all men in the National Prostate Cancer Register of Sweden (NPCR) who were diagnosed in 2008 with low-risk PC at age 70 years or younger, had radical prostatectomy, radiotherapy or AS as primary treatment and were alive in 2015. The reason for choosing men diagnosed in 2008 was that we wished to assess reasons for diverting from AS to treatment after several years of AS. The reason for choosing men younger than 70 years with low-risk disease was to avoid getting men in watchful waiting mixed with the active surveillance group.

The NPCR has a capture rate of > 96% compared with the national cancer registry, to which registration is mandatory by law<sup>10</sup>. Low-risk disease was defined as Gleason score 6, prostate-specific antigen (PSA) < 10 ng/ml, and clinical stage T1 or T2.

Between February and October 2015, 1720 men were invited to participate via a letter, in which we presented the study and its purpose. The letter included a questionnaire and an addressed and stamped envelope for reply. The participants could also fill out the questionnaire online by using an individual code which was included in the letter. Men who failed to return the questionnaire were contacted by a research assistant via telephone and were sent a second questionnaire.

The Regional Ethical Review Board at Uppsala University approved of the study.



### *Questionnaire design*

The questionnaire consisted of EPIC-26 and 49 study-specific questions (Appendix 1). EPIC-26 is an instrument designed to assess pelvic organ function and bother after PC treatment<sup>11</sup>. The study-specific questions were developed after interviews with men living with PC, and were tested for face validity with one investigator accompanying the men while they completed the questionnaire. Questions not fully understood were changed to achieve clarity. The questionnaire was further validated in an unpublished pilot study among men not included in the present study. Our technique for developing a study-specific questionnaire is based on a one-concept–one-question method producing self-reported outcomes and has been previously described<sup>12-14</sup>. The questionnaire explored mental symptoms, quality of life, and overall satisfaction with care. The questionnaire also assessed experiences at the time of diagnosis and at follow-up, socio-demographics, smoking, alcohol consumption, physical activity, treatments, concurrent diseases (Charlson Comorbidity Index (CCI)<sup>15</sup>), and psychiatric problems (obtained by asking if they suffered from depression and/or any other mental illness).

Factors potentially associated with choice of and adherence to AS was further evaluated by two direct questions. Choice of AS was evaluated by the question “If you were on active surveillance for prostate cancer but later received treatment, or if you are still on active surveillance - which of the following alternative(s) influenced the decision?”. Men had the possibility to grade the following alternatives from “I do not agree at all” to “I completely agree”, “I am/was not particularly worried about the prostate cancer”, “I did not want to risk leaking urine”, “I did not want to risk impairing my sexual function”, “I did not want to risk getting bowel problems”, “I preferred not undergoing any treatment”, “I wanted to

1  
2  
3 postpone any treatment until it was deemed necessary”, “I felt uneasy about the available  
4 treatment strategies (surgery and radiotherapy)” and “My doctor recommended active  
5 surveillance”. Adherence was evaluated by the question “Why was the active surveillance  
6 terminated and treatment initiated?” with the following alternatives where men had the  
7 possibility to choose more than one alternative, “The PSA level was rising”, “The prostate  
8 biopsies showed a more aggressive tumour”, “The initiative was mine and had nothing to  
9 do with the PSA level or prostate biopsies” and “The initiative was my doctor’s and had  
10 nothing to do with the PSA level or prostate biopsies”.  
11  
12  
13  
14  
15  
16  
17  
18  
19  
20  
21  
22  
23  
24

25 *Patient and Public Involvement statement:*

26  
27  
28  
29 Men living with prostate cancer were involved in the study early on as we conducted  
30 individual interviews with a small number of respondents to explore their perspectives on  
31 living with prostate cancer. The study-specific questions were developed after these  
32 interviews. However, men with prostate cancer were not involved in the conduct, analysis of  
33 data or writing the manuscript in other ways.  
34  
35  
36  
37  
38  
39  
40  
41  
42

43 *Data availability statement:*

44  
45  
46 No additional data available.  
47  
48  
49  
50  
51  
52

53 *Data collection, analysis, and statistical analysis*  
54  
55  
56  
57  
58  
59  
60

1  
2  
3 The questionnaires and cancer characteristics data from the NPCR were assembled in a  
4 database. Differences between responders and non-responders were analyzed. To assess  
5 factors associated with the initial choice of treatment, men were grouped by their initial  
6 treatment: curative or AS. To assess factors associated with adherence to AS, responders  
7 where grouped by whether they stayed on AS or diverged to treatment. Statements such as  
8 “substantial information” were defined as the highest possible response to that specific  
9 question.  
10  
11  
12  
13  
14  
15  
16  
17  
18  
19

20 Missing data were handled using multiple imputations based on the method of chained  
21 equations<sup>16</sup>. Five imputation data sets were created. The maximum number of imputed  
22 answers where 4%.  
23  
24  
25  
26  
27

28 The analysis of factors associated with choice and adherence to AS was carried out using  
29 logistic regression. A multivariate analysis was performed including age, retirement,  
30 education and CCI and it is these values that are presented. Odds ratios (ORs) with 95%  
31 confidence interval (CI) show the probability of choosing and adhering to AS.  
32  
33  
34  
35  
36  
37  
38  
39  
40  
41

## 42 Results

### 43 *Patient characteristics*

44  
45  
46 In all, 1288 (75%) of the 1720 invited men responded. Mean age at diagnosis was 63 years  
47 old (range 40–70) (Table 1a).  
48  
49  
50  
51  
52  
53

54  
55 Non-responders were on average one year younger, had lower T-stage and lower PSA, were  
56 more likely to be diagnosed after PSA-testing, and were more likely to be initially managed  
57 with AS (data from the NPCR) (Appendix 2).  
58  
59  
60

1  
2  
3 A total of 451 (35%) chose AS and 837 (65%) underwent immediate treatment. Of the men  
4 who initially chose AS, 238 (53%) diverted to treatment within seven years, of whom 70%  
5 did so within the first three years (Table 1b and Figure 1). Prostate cancers comprised of 3%  
6 T1a, 1% T1b, 74% T1c and 22% T2 tumors.  
7  
8  
9

10  
11  
12  
13  
14  
15  
16  
17  
18 The vast majority of men primarily consulted either a urologist or a clinical oncologist, 18%  
19 consulted both a urologist and a clinical oncologist.  
20  
21  
22

### 23 24 25 26 27 *Factors associated with choice*

28  
29  
30 Factors statistically associated with choosing AS over treatment included older age (OR  
31 1.81, 95% CI 1.29-2.54 for men aged <60 yr vs men aged 66–70 yr), a CCI >2 (OR 1.50,  
32 95% CI 1.06–2.13, compared with CCI 0), unaccompanied when being notified of the  
33 diagnosis (OR 1.45, 95% CI 1.11-1.89) and being presented with AS by the treating  
34 physician (OR 9.27, 95% CI 7.04-12.19). Factors statistically associated with not choosing  
35 AS over treatment included whether men were still working (OR 0.69, 95% CI 0.47-1.00)  
36 and/or had a T2 tumor (OR 0.40, 95% CI 0.29-0.56). (Figure 2)  
37  
38  
39

40  
41  
42 PSA at diagnosis (OR 0.67, 95% CI 0.40-1.13), time to reflect on treatment options (OR  
43 0.93, 95% CI 0.63-1.39) and whether the men had seen both a urologist and a clinical  
44 oncologist (OR 1.13, 95% CI 0.83-1.53) were not statistically significantly associated with  
45 choice.  
46  
47  
48  
49  
50  
51  
52  
53  
54  
55  
56  
57  
58  
59  
60

1  
2  
3 Regarding the direct questions on why the men chose AS (Figure 3) (defined as completely  
4 or largely agreed),  
5  
6

- 7 • 83% “My doctor recommended AS”
- 8
- 9 • 74% “I did not want to risk leaking urine”
- 10
- 11 • 66% “I did not want to risk getting bowel problems”
- 12
- 13 • 64% “I am/was not particularly worried about the prostate cancer”
- 14
- 15 • 62% “I did not want to risk impairing my sexual function”,
- 16
- 17 • 55% “I wanted to postpone any treatment until it was deemed necessary”
- 18
- 19 • 49% “I felt uneasy about the available treatment strategies (surgery and
- 20 radiotherapy)”
- 21
- 22 • 39% “I preferred not undergoing any treatment”
- 23
- 24
- 25
- 26
- 27
- 28
- 29
- 30
- 31
- 32

### 33 *Factors associated with adherence*

34  
35  
36  
37 Men with PC detected during investigation of LUTS (Lower Urinary Tract Symptoms)  
38 rather than screening was associated with adhering to AS (OR 1.78, 95% CI 1.16-2.72). Men  
39 with a higher PSA at the time of diagnosis (OR 0.26, 95% CI 0.10-0.63) were less likely to  
40 adhere to AS. (Figure 4)  
41  
42  
43  
44  
45  
46

47 Regarding the direct question on reasons for diverting to treatment (Figure 5), (defined as  
48 completely or largely agreed)  
49  
50

- 51 • 55% “the PSA level was rising”
- 52
- 53 • 36% “the prostate biopsies showed a more aggressive tumor”
- 54
- 55 • 6% “the initiative was my doctor’s and had nothing to do with the PSA level or
- 56 prostate biopsies”
- 57
- 58
- 59
- 60

- 3% “the initiative was mine and had nothing to do with the PSA level or prostate biopsies”

## Discussion

In this nationwide population-based study, a doctor’s recommendation was a strong predictor for choosing AS, as was patient characteristics such as older age and more concurrent diseases. Men without anyone accompanying them when they were notified of the cancer diagnosis were more likely to opt for AS. Regarding adherence to AS, a low PSA at the time of diagnosis was an important factor, both according to the multivariate analysis and the direct question. Further, men whose PC was detected during the investigation of LUTS was more likely to adhere to AS. A unique feature of our study is that we could quantify the relative importance of different potential reasons for choosing and adhering to AS, as the men could tick more than one reason and grade its importance.

A doctor’s recommendation emerged as strongest factor associated with choice. This is highlighted in our direct question on choice where a doctor’s recommendation was the single strongest predictor for choosing AS with 83% stating that they chose AS because their doctor recommended it. In fact, more men specified a doctor’s recommendation as a reason for choosing AS than the will to avoid side-effects from treatment. This is in line with the review article about factors influencing men's choice of and adherence to AS by Kinsella et al <sup>9</sup>, in which a physician’s recommendation was identified as an important element in choosing AS <sup>17-20</sup>. In light of the evidence from multiple studies for the importance of the physician’s recommendation in favor for choosing AS, the most important

1  
2  
3 cause of the rapid increase in uptake on AS in Sweden over the past decade<sup>3</sup>, was probably  
4 the Swedish national guidelines' clear recommendation since 2007 of AS for men with low-  
5 risk PC. The recommendation was during this time period less clear in the European and US  
6 recommendations<sup>21,22</sup>, in which AS was mentioned as an alternative to radical treatment  
7 rather than the first choice option.  
8  
9

10  
11  
12 That patient characteristics, such as a higher age, were associated with AS is in line with  
13 previous studies<sup>18,23</sup>. It is possible that some of these men might have diverted from AS to  
14 watchful waiting during the seven years of follow-up as the oldest had reached 77 years by  
15 2015 and might not have been eligible for treatment.  
16  
17

18  
19  
20 On multivariate analysis, being unaccompanied when notified of the cancer diagnosis  
21 predicted choice of AS. This might reflect that these men are more prone to accept the  
22 physician's suggestion if no one else was influencing them to undergo treatment. This  
23 highlights the responsibility of the treating physician, not only directed towards the patients  
24 but also to their significant others, to facilitate an informed treatment decision. A recently  
25 published qualitative study by Mader et al stating that spousal and social support play  
26 important roles in helping men understand and accept their PC diagnosis and chosen care  
27 plan<sup>24</sup>. In our study, 18% of men saw both a urologist and a clinical oncologist but this did  
28 not affect the choice of treatment.  
29  
30  
31  
32  
33  
34  
35  
36  
37  
38  
39  
40  
41  
42  
43  
44  
45  
46  
47  
48

49  
50 The participants in our study were diagnosed in 2008. Since then, uptake on AS in Sweden  
51 has steadily increased and reached 74% by 2014<sup>3</sup>. In our study, 35% initially chose AS and  
52 47% were still on AS after seven years follow-up. This is in line with a study by Loeb et al  
53 from 2015 that reported 64 % adherence to AS after five years<sup>25</sup> as well as the PRIAS study  
54  
55  
56  
57  
58  
59  
60

1  
2  
3 where 50% diverted to treatment within five years, mostly due to protocol-based  
4 reclassification (biopsy-related, changes in T-stage and/or PSA-doubling time) <sup>26</sup>.  
5  
6  
7  
8  
9

10  
11 The main patient reported driver behind diverting to treatment was a rise in PSA. Only 9%  
12 of the men stated that the decision to diverge from AS to treatment was not because of PSA  
13 and/or biopsy results. PSA is considered a poor marker for disease progression, which for  
14 example was shown by Fall et al when looking at men with high-risk disease <sup>27</sup>. Several  
15 studies have shown that many men with low-risk PC overestimate the risk of living with an  
16 untreated cancer <sup>28,29</sup>, something that might be further magnified by rising PSA. In the  
17 PIVOT study, no difference in mortality was detected between men who were randomized to  
18 radical prostatectomy or observation after nearly 20 years of follow-up <sup>30</sup>. Roughly half of  
19 the men in our study, who all had low-risk PC diverted to treatment within these seven years  
20 which represents a significant overtreatment. Adherence to AS protocols and additional  
21 methods for follow-up such as MRI <sup>31</sup> and evidence-based triggers for treatment might  
22 reduce the fear of living with untreated cancer and thereby reduce unnecessary treatment.  
23  
24  
25  
26  
27  
28  
29  
30  
31  
32  
33  
34  
35  
36  
37  
38  
39

40 Interestingly, men whose PC was detected during the investigation of LUTS rather than  
41 through screening was more likely to adhere to AS. This finding persisted after adjusting for  
42 age, retirement and CCI. A possible explanation might be a higher degree of anxiety in the  
43 group whose PC was detected through screening rather through the investigation on LUTS,  
44 although we do not have any data to support this. A recently published review article on  
45 psychological distress during cancer-screening <sup>32</sup> indicated that psychological distress,  
46 although low and not a barrier to screening, might be present. There might also be a  
47 motivational difference where men diagnosed through screening actively sought the  
48 investigation of PC and might be more motivated to undergo treatment. Another possible  
49  
50  
51  
52  
53  
54  
55  
56  
57  
58  
59  
60



1  
2  
3 explanation might be that men diagnosed through the investigation of LUTS might have  
4  
5 received drugs that reduce PSA e.g. Finasteride.  
6  
7  
8  
9

10  
11  
12 The strengths of our study include its population-based design, the high response rate for a  
13  
14 study of its kind, the face-validated study-specific questionnaire, and the direct questions on  
15  
16 reasons for choice and adherence. We acknowledge that various selection mechanisms  
17  
18 affected the men's choice of treatment and that several important factors could have been  
19  
20 missed. The retrospective design is a limitation, as the men's experiences during the seven-  
21  
22 year follow-up might have affected their recollection of their experiences. We did not have  
23  
24 access to PSA levels during AS, only at diagnosis, which limits the possibility to investigate  
25  
26 how PSA monitoring affects adherence to AS. Regarding being unaccompanied when  
27  
28 notified of the cancer diagnosis, it's important to acknowledge that while these were  
29  
30 unaccompanied during the appointment, they still might have had support from people in  
31  
32 their support network. The study included Swedish men only and the findings might  
33  
34 therefore not be generalizable to other cultural and health-care settings.  
35  
36  
37  
38  
39  
40  
41  
42  
43  
44

#### 45 Conclusions

46  
47  
48 A doctor's recommendation strongly affects which treatment is chosen for men with low-  
49  
50 risk PC. Rising PSA values were the main factor for initiating treatment for men on AS.  
51  
52 These findings need to be considered by health-care providers who wish to increase the  
53  
54 uptake of and adherence to AS.  
55  
56  
57  
58  
59  
60

1  
2  
3  
4  
5  
6  
7  
8  
9  
10  
11  
12  
13  
14  
15  
16  
17 Author contributions: Oskar Bergengren had full access to all the data in the study and  
18 takes responsibility for the integrity of the data and the accuracy of the data analysis.  
19  
20  
21  
22

23  
24 Study concept and design: Bergengren, Garmo, Bratt, Johansson, Bill-Axelson.  
25

26 Acquisition of data: Bergengren, Johansson, Bill-Axelson.  
27

28 Analysis and interpretation of data: Bergengren, Garmo, Holmberg, Johansson, Bill-  
29 Axelson.  
30  
31

32 Drafting of the manuscript: Bergengren, Johansson, Bill-Axelson.  
33  
34

35 Critical revision of the manuscript for important intellectual content: Bergengren, Bratt,  
36 Holmberg, Johansson, Bill-Axelson.  
37  
38

39 Statistical analysis: Garmo.  
40

41 Obtaining funding: Bill-Axelson.  
42  
43

44 Administrative, technical, or material support: Bill-Axelson  
45

46 Supervision: Holmberg, Johansson, Bill-Axelson.  
47  
48

49 Other: None.  
50  
51

52  
53 Acknowledgements: We wish to thank Ellen Kragsterman for her excellent help with data  
54 collection during this study. We also wish to thank all of the men who answered the  
55 questionnaire.  
56  
57  
58  
59  
60

1  
2  
3  
4  
5  
6  
7 Declaration of interests: Oskar Bergengren certifies that there are no conflicts of interest,  
8  
9 including specific financial interests and relationships and affiliations relevant to the subject  
10  
11 matter or materials discussed in the manuscript.  
12  
13  
14  
15  
16  
17

18 Funding/Support and role of the sponsor: This research was funded by grants from the  
19  
20 Swedish cancer society. The funder had no role in the design and conduct of the study;  
21  
22 collection, management, analysis, and interpretation of data; writing of the manuscript; or  
23  
24 the decision to submit the manuscript for publication.  
25  
26  
27  
28  
29  
30  
31  
32  
33  
34  
35  
36  
37  
38  
39  
40  
41  
42  
43  
44  
45  
46  
47  
48  
49  
50  
51  
52  
53  
54  
55  
56  
57  
58  
59  
60

1. Cooperberg MR. Active Surveillance for Low-Risk Prostate Cancer-An Evolving International Standard of Care. *JAMA Oncol.* 2017;3(10):1398-1399.
2. Cooperberg MR, Carroll PR. Trends in Management for Patients With Localized Prostate Cancer, 1990-2013. *JAMA.* 2015;314(1):80-82.
3. Loeb S, Folkvaljon Y, Curnyn C, Robinson D, Bratt O, Stattin P. Uptake of Active Surveillance for Very-Low-Risk Prostate Cancer in Sweden. *JAMA Oncol.* 2017;3(10):1393-1398.
4. Auffenberg GB, Lane BR, Linsell S, Cher ML, Miller DC. Practice- vs Physician-Level Variation in Use of Active Surveillance for Men With Low-Risk Prostate Cancer: Implications for Collaborative Quality Improvement. *JAMA Surg.* 2017;152(10):978-980.
5. Kinsella N, Helleman J, Bruinsma S, et al. Active surveillance for prostate cancer: a systematic review of contemporary worldwide practices. *Transl Androl Urol.* 2018;7(1):83-97.
6. Mitsuzuka K, Koga H, Sugimoto M, et al. Current use of active surveillance for localized prostate cancer: A nationwide survey in Japan. *Int J Urol.* 2015;22(8):754-759.
7. Bul M, Zhu X, Valdagni R, et al. Active surveillance for low-risk prostate cancer worldwide: the PRIAS study. *Eur Urol.* 2013;63(4):597-603.
8. Tosoian JJ, Mamawala M, Epstein JI, et al. Intermediate and Longer-Term Outcomes From a Prospective Active-Surveillance Program for Favorable-Risk Prostate Cancer. *J Clin Oncol.* 2015;33(30):3379-3385.
9. Kinsella N, Stattin P, Cahill D, et al. Factors Influencing Men's Choice of and Adherence to Active Surveillance for Low-risk Prostate Cancer: A Mixed-method Systematic Review. *Eur Urol.* 2018.
10. Van Hemelrijck M, Wigertz A, Sandin F, et al. Cohort Profile: the National Prostate Cancer Register of Sweden and Prostate Cancer data Base Sweden 2.0. *International journal of epidemiology.* 2013;42(4):956-967.
11. Wei JT, Dunn RL, Litwin MS, Sandler HM, Sanda MG. Development and validation of the expanded prostate cancer index composite (EPIC) for comprehensive assessment of health-related quality of life in men with prostate cancer. *Urology.* 2000;56(6):899-905.
12. Johansson E, Bill-Axelsson A, Holmberg L, et al. Time, symptom burden, androgen deprivation, and self-assessed quality of life after radical prostatectomy or watchful waiting: the Randomized Scandinavian Prostate Cancer Group Study Number 4 (SPCG-4) clinical trial. *Eur Urol.* 2009;55(2):422-430.

13. Steineck G, Helgesen F, Adolfsson J, et al. Quality of life after radical prostatectomy or watchful waiting. *N Engl J Med*. 2002;347(11):790-796.
14. Kreicbergs U, Valdimarsdottir U, Onelov E, Henter JJ, Steineck G. Talking about death with children who have severe malignant disease. *N Engl J Med*. 2004;351(12):1175-1186.
15. Charlson M, Szatrowski TP, Peterson J, Gold J. Validation of a combined comorbidity index. *J Clin Epidemiol*. 1994;47(11):1245-1251.
16. Buuren Sv. *Flexible imputation of missing data*. Boca Raton, FL: CRC Press; 2012.
17. Davison BJ, Breckon E. Factors influencing treatment decision making and information preferences of prostate cancer patients on active surveillance. *Patient Education and Counseling*. 2012;87(3):369-374.
18. Hoffman KE, Niu J, Shen Y, et al. Physician variation in management of low-risk prostate cancer: a population-based cohort study. *JAMA internal medicine*. 2014;174(9):1450-1459.
19. Gorin MA, Soloway CT, Eldefrawy A, Soloway MS. Factors That Influence Patient Enrollment in Active Surveillance for Low-risk Prostate Cancer. *Urology*. 2011;77(3):588-591.
20. Scherr KA, Fagerlin A, Hofer T, et al. Physician Recommendations Trump Patient Preferences in Prostate Cancer Treatment Decisions. *Medical Decision Making*. 2017;37(1):56-69.
21. Ganz PA, Barry JM, Burke W, et al. National Institutes of Health State-of-the-Science Conference: role of active surveillance in the management of men with localized prostate cancer. *Annals of internal medicine*. 2012;156(8):591-595.
22. Heidenreich A, Bellmunt J, Bolla M, et al. EAU guidelines on prostate cancer. Part 1: screening, diagnosis, and treatment of clinically localised disease. *Eur Urol*. 2011;59(1):61-71.
23. Maurice MJ, Abouassaly R, Kim SP, Zhu H. Contemporary Nationwide Patterns of Active Surveillance Use for Prostate Cancer. *JAMA internal medicine*. 2015;175(9):1569-1571.
24. Mader EM, Li HH, Lyons KD, et al. Qualitative insights into how men with low-risk prostate cancer choosing active surveillance negotiate stress and uncertainty. *BMC Urology*. 2017;17(1):35.
25. Loeb S, Folkvaljon Y, Makarov DV, Bratt O, Bill-Axelsson A, Stattin P. Five-year nationwide follow-up study of active surveillance for prostate cancer. *Eur Urol*. 2015;67(2):233-238.
26. Bokhorst LP, Valdagni R, Rannikko A, et al. A Decade of Active Surveillance in the PRIAS Study: An Update and Evaluation of the Criteria Used to Recommend a Switch to Active Treatment. *Eur Urol*. 2016;70(6):954-960.
27. Fall K, Garmo H, Andren O, et al. Prostate-specific antigen levels as a predictor of lethal prostate cancer. *J Natl Cancer Inst*. 2007;99(7):526-532.
28. Xu J, Janisse J, Ruterbusch JJ, et al. Patients' Survival Expectations With and Without Their Chosen Treatment for Prostate Cancer. *Annals of family medicine*. 2016;14(3):208-214.
29. Kendel F, Helbig L, Neumann K, et al. Patients' perceptions of mortality risk for localized prostate cancer vary markedly depending on their treatment strategy. *International journal of cancer*. 2016;139(4):749-753.

- 1
- 2
- 3 30. Wilt TJ, Jones KM, Barry MJ, et al. Follow-up of Prostatectomy versus Observation
- 4 for Early Prostate Cancer. *N Engl J Med.* 2017;377(2):132-142.
- 5
- 6 31. Litwin MS, Tan HJ. The Diagnosis and Treatment of Prostate Cancer: A Review.
- 7 *Jama.* 2017;317(24):2532-2542.
- 8 32. Chad-Friedman E, Coleman S, Traeger LN, et al. Psychological distress associated
- 9 with cancer screening: A systematic review. *Cancer.* 2017;123(20):3882-3894.
- 10
- 11
- 12
- 13
- 14
- 15
- 16
- 17
- 18
- 19
- 20
- 21
- 22
- 23
- 24
- 25
- 26
- 27
- 28
- 29
- 30
- 31
- 32
- 33
- 34
- 35
- 36
- 37
- 38
- 39
- 40
- 41
- 42
- 43
- 44
- 45
- 46
- 47
- 48
- 49
- 50
- 51
- 52
- 53
- 54
- 55
- 56
- 57
- 58
- 59
- 60

For peer review only

## Figure legends

Table 1a: Demographics, clinical characteristics and potential factors associated with the choice of treatment by treatment group. AS = Active surveillance; RP/RT = Radical prostatectomy or Radiotherapy. Numbers are frequencies with percentages in brackets unless otherwise stated.

Table 1b: Demographics, clinical characteristics and potential factors associated with adherence to active surveillance by treatment group. AS -> AS = Stayed on active surveillance; AS -> RP/RT = Diverted from active surveillance to Radical prostatectomy or Radiotherapy. Numbers are frequencies with percentages in brackets unless otherwise stated.

Figure 1: Flow chart showing patients participation and treatment.

Figure 2: Forrest plot illustrating choice. OR (Odds ratios) shows the probability of choosing active surveillance as primary treatment. An OR above 1 favor AS. Adjusted for age, work status, education, and Charlson comorbidity index.

Figure 3: Bar chart illustrating the direct question on why men chose active surveillance as their primary treatment. Numbers are frequencies with percentages.

Figure 4: Forrest plot illustrating adherence. OR (Odds ratios) shows the probability of adhering to active surveillance. An OR above 1 favor adhering to AS. Adjusted for age, work status, education, and Charlson comorbidity index.

Figure 5: Bar chart illustrating the direct question on time spent in active surveillance and why men terminated active surveillance. Numbers are frequencies with percentages.

| <b>Table 1a - Choice</b>                                       |                                 | AS  |             | RP/RT |             | ALL  |             |
|----------------------------------------------------------------|---------------------------------|-----|-------------|-------|-------------|------|-------------|
| n                                                              |                                 | 451 | '(100.0)    | 837   | '(100.0)    | 1288 | '(100.0)    |
| Age, n (range)                                                 |                                 | 64  | ( 61 - 67 ) | 62    | ( 58 - 65 ) | 63   | ( 59 - 66 ) |
| Marital status n (%)                                           |                                 |     |             |       |             |      |             |
|                                                                | Married or domestic partner     | 367 | '(81.4)     | 701   | '(83.8)     | 1068 | '(82.9)     |
|                                                                | Other                           | 73  | '(16.2)     | 126   | '(15.1)     | 199  | '(15.5)     |
|                                                                | Missing                         | 11  | (2.4)       | 10    | '(1.2)      | 21   | '(1.6)      |
| Children n (%)                                                 |                                 |     |             |       |             |      |             |
|                                                                | No children                     | 36  | '(8.0)      | 70    | '(8.4)      | 106  | '(8.2)      |
|                                                                | Children                        | 401 | '(88.9)     | 747   | '(89.2)     | 1148 | '(89.1)     |
|                                                                | Missing                         | 14  | '(3.1)      | 20    | '(2.4)      | 34   | '(2.6)      |
| Work status, n (%)                                             |                                 |     |             |       |             |      |             |
|                                                                | Not retired                     | 74  | '(16.4)     | 211   | '(25.2)     | 285  | '(22.1)     |
|                                                                | Retired                         | 377 | '(83.6)     | 626   | '(74.8)     | 1003 | '(77.9)     |
|                                                                | Missing                         | 0   | '(0.0)      | 0     | '(0.0)      | 0    | '(0.0)      |
| Education level, n (%)                                         |                                 |     |             |       |             |      |             |
|                                                                | Compulsory school               | 143 | '(31.7)     | 208   | '(24.9)     | 351  | '(27.3)     |
|                                                                | Secondary school                | 166 | '(36.8)     | 347   | '(41.5)     | 513  | '(39.8)     |
|                                                                | University                      | 128 | '(28.4)     | 265   | '(31.7)     | 393  | '(30.5)     |
|                                                                | Missing                         | 14  | '(3.1)      | 17    | '(2.0)      | 31   | '(2.4)      |
| Charlson comorbidity index, n (%)                              |                                 |     |             |       |             |      |             |
|                                                                | 0                               | 129 | '(28.6)     | 282   | '(33.7)     | 411  | '(31.9)     |
|                                                                | 1                               | 142 | '(31.5)     | 296   | '(35.4)     | 438  | '(34.0)     |
|                                                                | 2                               | 85  | '(18.8)     | 144   | '(17.2)     | 229  | '(17.8)     |
|                                                                | >2                              | 95  | '(21.1)     | 115   | '(13.7)     | 210  | '(16.3)     |
| Psychiatric illness, n (%)                                     |                                 |     |             |       |             |      |             |
|                                                                | No                              | 411 | '(91.1)     | 770   | '(92.0)     | 1181 | '(91.7)     |
|                                                                | Yes (Depression/ Other)         | 40  | '(8.9)      | 67    | '(8.0)      | 107  | '(8.3)      |
| T-stage                                                        |                                 |     |             |       |             |      |             |
|                                                                | T1ab                            | 37  | (8.2)       | 16    | '(1.9)      | 53   | '(4.1)      |
|                                                                | T1c                             | 354 | (78.5)      | 599   | '(71.6)     | 953  | '(74.0)     |
|                                                                | T2                              | 60  | (13.3)      | 222   | '(26.5)     | 282  | '(21.9)     |
| PSA value at diagnosis, n (%)                                  |                                 |     |             |       |             |      |             |
|                                                                | 0-3.0                           | 31  | (6.9)       | 41    | '(4.9)      | 72   | '(5.6)      |
|                                                                | 3.1-7.0                         | 325 | (72.1)      | 597   | '(71.3)     | 922  | '(71.6)     |
|                                                                | 7.1-10.0                        | 95  | (21.1)      | 199   | '(23.8)     | 294  | '(22.8)     |
| Method of detection n (%)                                      |                                 |     |             |       |             |      |             |
|                                                                | Screening                       | 228 | (50.6)      | 481   | '(57.5)     | 709  | '(55.0)     |
|                                                                | LUTS                            | 161 | (35.7)      | 216   | '(25.8)     | 377  | '(29.3)     |
|                                                                | Other symptoms                  | 51  | (11.3)      | 109   | '(13.0)     | 160  | '(12.4)     |
|                                                                | Missing                         | 11  | (2.4)       | 31    | '(3.7)      | 42   | '(3.3)      |
| Alone when being notified of the cancer diagnosis n (%)        |                                 |     |             |       |             |      |             |
|                                                                | No                              | 107 | '(23.7)     | 256   | '(30.6)     | 363  | '(28.2)     |
|                                                                | Yes                             | 332 | '(73.6)     | 568   | '(67.9)     | 900  | '(69.9)     |
|                                                                | Missing                         | 12  | '(2.7)      | 13    | '(1.6)      | 25   | '(1.9)      |
| Sufficient time from diagnosis until treatment decision, n (%) |                                 |     |             |       |             |      |             |
|                                                                | No, i wanted a quicker decision | 27  | '(6.0)      | 48    | '(5.7)      | 75   | '(5.8)      |
|                                                                | Yes                             | 363 | '(80.5)     | 739   | '(88.3)     | 1102 | '(85.6)     |
|                                                                | No, i wanted more time to think | 11  | '(2.4)      | 35    | '(4.2)      | 46   | '(3.6)      |
|                                                                | Missing                         | 50  | '(11.1)     | 15    | '(1.8)      | 65   | '(5.0)      |



| <b>Table 1b - Adherence</b>                                    | <b>AS-&gt;AS</b> | <b>AS -&gt; RP/RT</b> | <b>ALL</b>   |
|----------------------------------------------------------------|------------------|-----------------------|--------------|
|                                                                | 213 (100.0)      | 238 (100.0)           | 451 (100.0)  |
| Age, n (range)                                                 | 65 (61 - 68)     | 64 (61 - 66)          | 64 (61 - 67) |
| Marital status n (%)                                           |                  |                       |              |
| Married or domestic partner                                    | 174 (81.7)       | 193 (81.1)            | 367 (81.4)   |
| Other                                                          | 35 (16.4)        | 38 (16.0)             | 73 (16.2)    |
| Missing                                                        | 4 (1.9)          | 7 (2.9)               | 11 (2.4)     |
| Children n (%)                                                 |                  |                       |              |
| No children                                                    | 20 (9.4)         | 16 (6.7)              | 36 (8.0)     |
| Children                                                       | 186 (87.3)       | 215 (90.3)            | 401 (88.9)   |
| Missing                                                        | 7 (3.3)          | 7 (2.9)               | 14 (3.1)     |
| Work status, n (%)                                             |                  |                       |              |
| Not retired                                                    | 33 (15.5)        | 41 (17.2)             | 74 (16.4)    |
| Retired                                                        | 180 (84.5)       | 197 (82.8)            | 377 (83.6)   |
| Missing                                                        | 0 (0.0)          | 0 (0.0)               | 0 (0.0)      |
| Education level, n (%)                                         |                  |                       |              |
| Compulsory school                                              | 65 (30.5)        | 78 (32.8)             | 143 (31.7)   |
| Secondary school                                               | 78 (36.6)        | 88 (37.0)             | 166 (36.8)   |
| University                                                     | 64 (30.0)        | 64 (26.9)             | 128 (28.4)   |
| Missing                                                        | 6 (2.8)          | 8 (3.4)               | 14 (3.1)     |
| Charlson comorbidity index, n (%)                              |                  |                       |              |
| 0                                                              | 56 (26.3)        | 73 (30.7)             | 129 (28.6)   |
| 1                                                              | 70 (32.9)        | 72 (30.3)             | 142 (31.5)   |
| 2                                                              | 36 (16.9)        | 49 (20.6)             | 85 (18.8)    |
| >2                                                             | 51 (23.9)        | 44 (18.5)             | 95 (21.1)    |
| Psychiatric illness, n (%)                                     |                  |                       |              |
| No                                                             | 189 (88.7)       | 222 (93.3)            | 411 (91.1)   |
| Yes (Depression/ Other)                                        | 24 (11.3)        | 16 (6.7)              | 40 (8.9)     |
| T-stage                                                        |                  |                       |              |
| T1ab                                                           | 26 (12.2)        | 11 (4.6)              | 37 (8.2)     |
| T1c                                                            | 156 (73.2)       | 198 (83.2)            | 354 (78.5)   |
| T2                                                             | 31 (14.6)        | 29 (12.2)             | 60 (13.3)    |
| PSA value at diagnosis, n (%)                                  |                  |                       |              |
| 0-3.0                                                          | 23 (10.8)        | 8 (3.4)               | 31 (6.9)     |
| 3.1-7.0                                                        | 151 (70.9)       | 174 (73.1)            | 325 (72.1)   |
| 7.1-10.0                                                       | 39 (18.3)        | 56 (23.5)             | 95 (21.1)    |
| Method of detection n (%)                                      |                  |                       |              |
| Screening                                                      | 94 (44.1)        | 134 (56.3)            | 228 (50.6)   |
| LUTS                                                           | 89 (41.8)        | 72 (30.3)             | 161 (35.7)   |
| Other symptoms                                                 | 22 (10.3)        | 29 (12.2)             | 51 (11.3)    |
| Missing                                                        | 8 (3.8)          | 3 (1.3)               | 11 (2.4)     |
| Alone when being notified of the cancer diagnosis n (%)        |                  |                       |              |
| No                                                             | 44 (20.7)        | 63 (26.5)             | 107 (23.7)   |
| Yes                                                            | 164 (77.0)       | 168 (70.6)            | 332 (73.6)   |
| Missing                                                        | 5 (2.3)          | 7 (2.9)               | 12 (2.7)     |
| Sufficient time from diagnosis until treatment decision, n (%) |                  |                       |              |
| No, i wanted a quicker decision                                | 9 (4.2)          | 18 (7.6)              | 27 (6.0)     |
| Yes                                                            | 152 (71.4)       | 211 (88.7)            | 363 (80.5)   |
| No, i wanted more time to think                                | 5 (2.3)          | 6 (2.5)               | 11 (2.4)     |
| Missing                                                        | 47 (22.1)        | 3 (1.3)               | 50 (11.1)    |

# Figure 1 - Flowchart

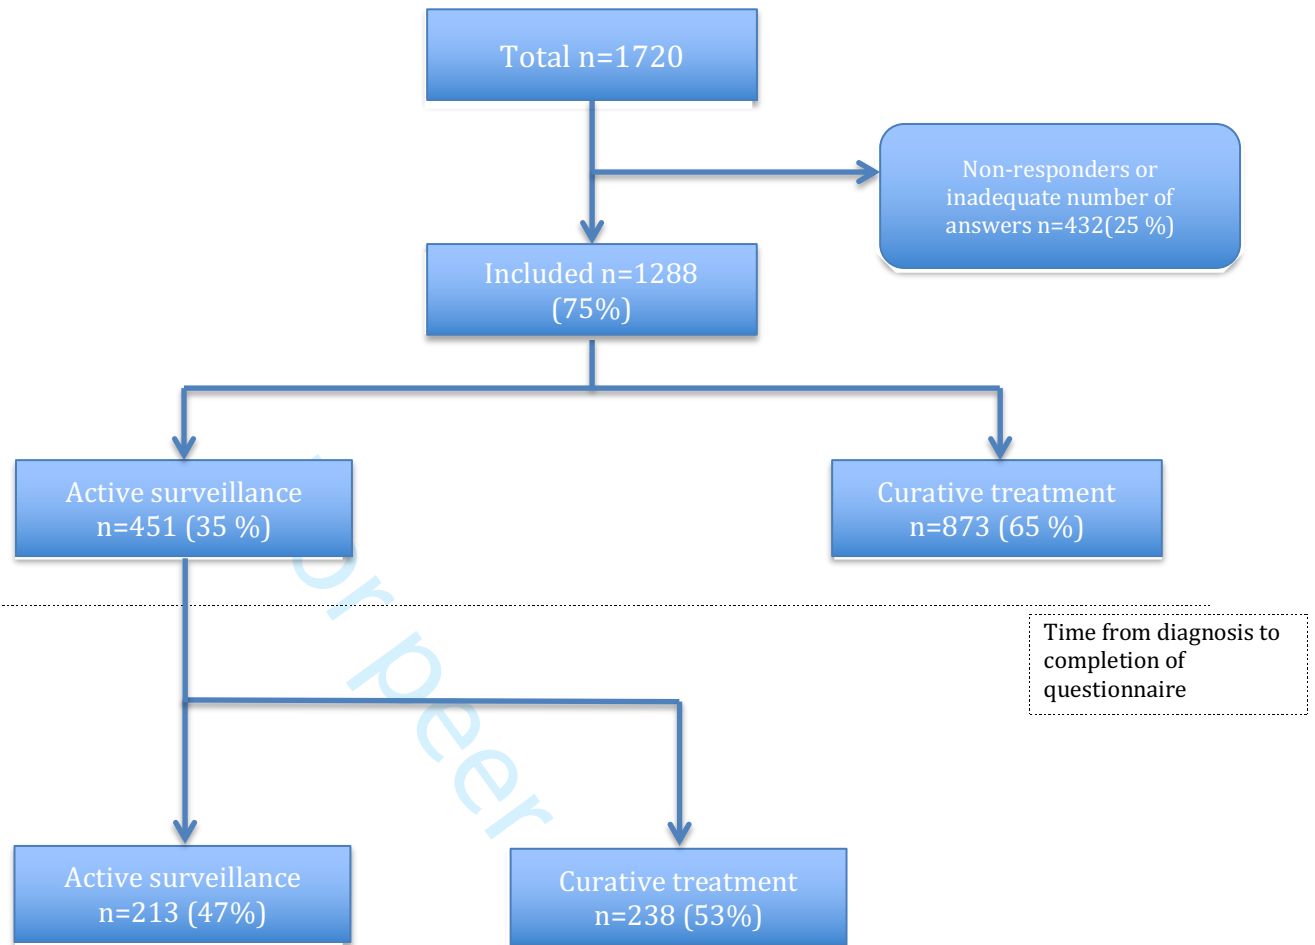

**Figure 2 - Choice**

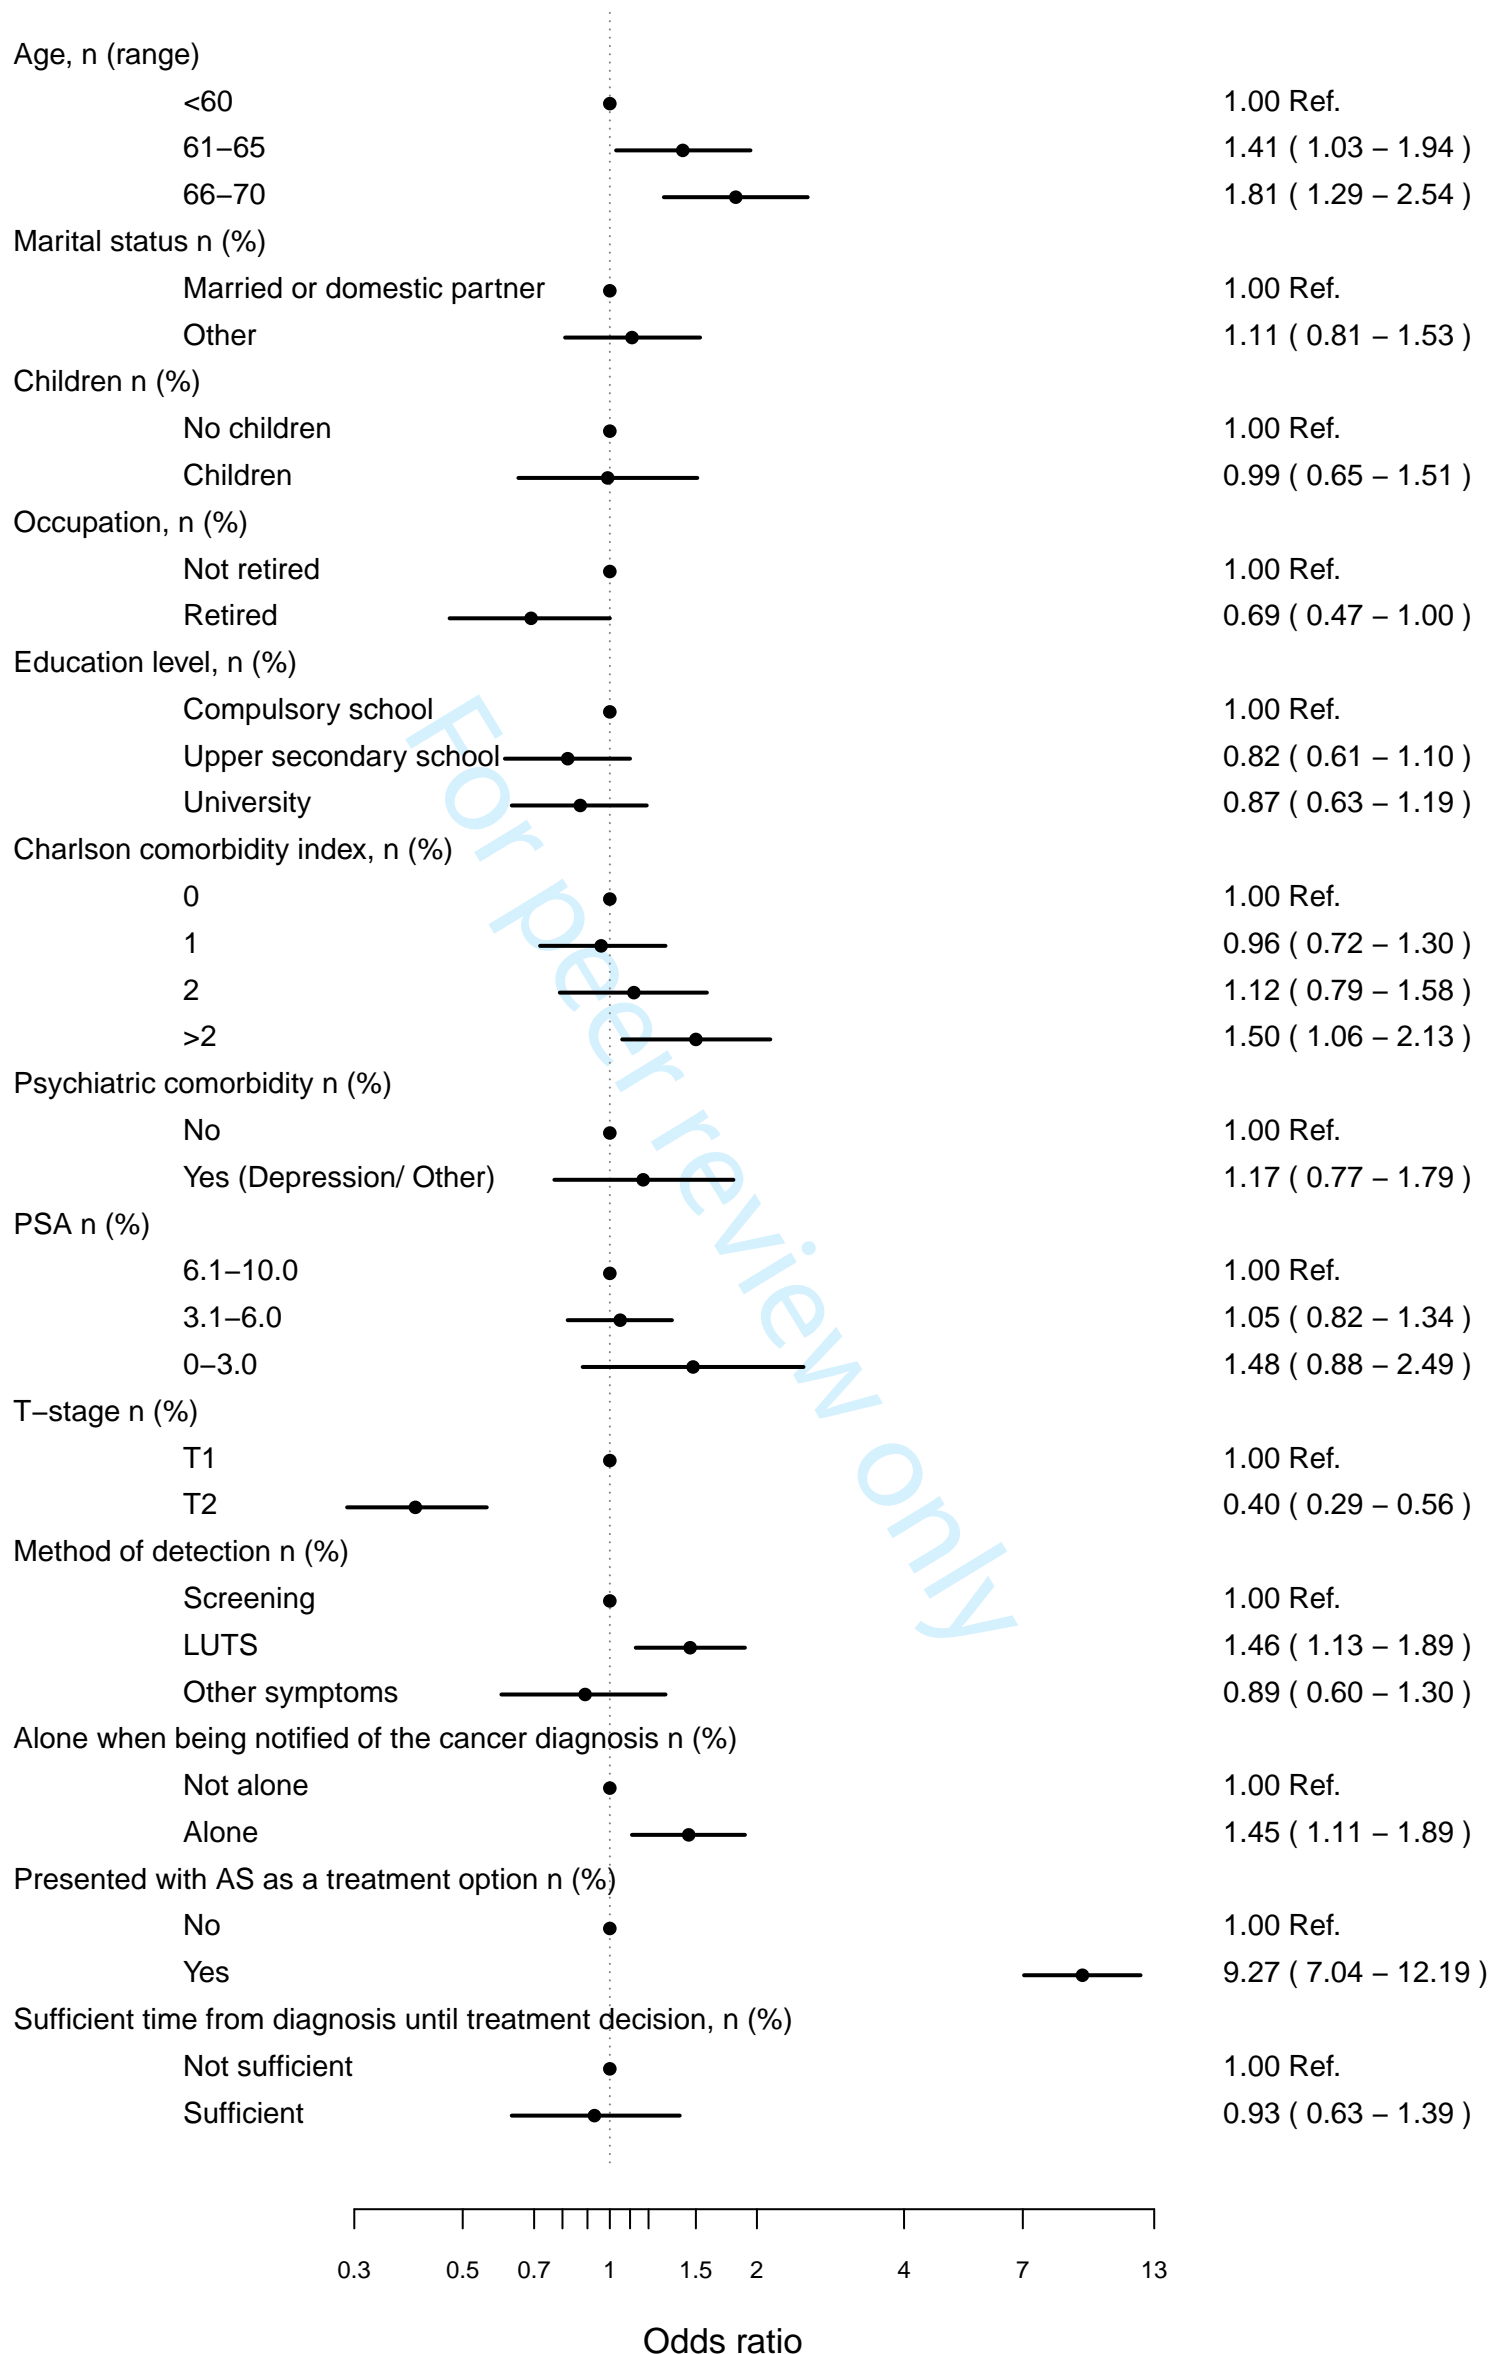

Figure 3 - direct question on why the men chose active surveillance

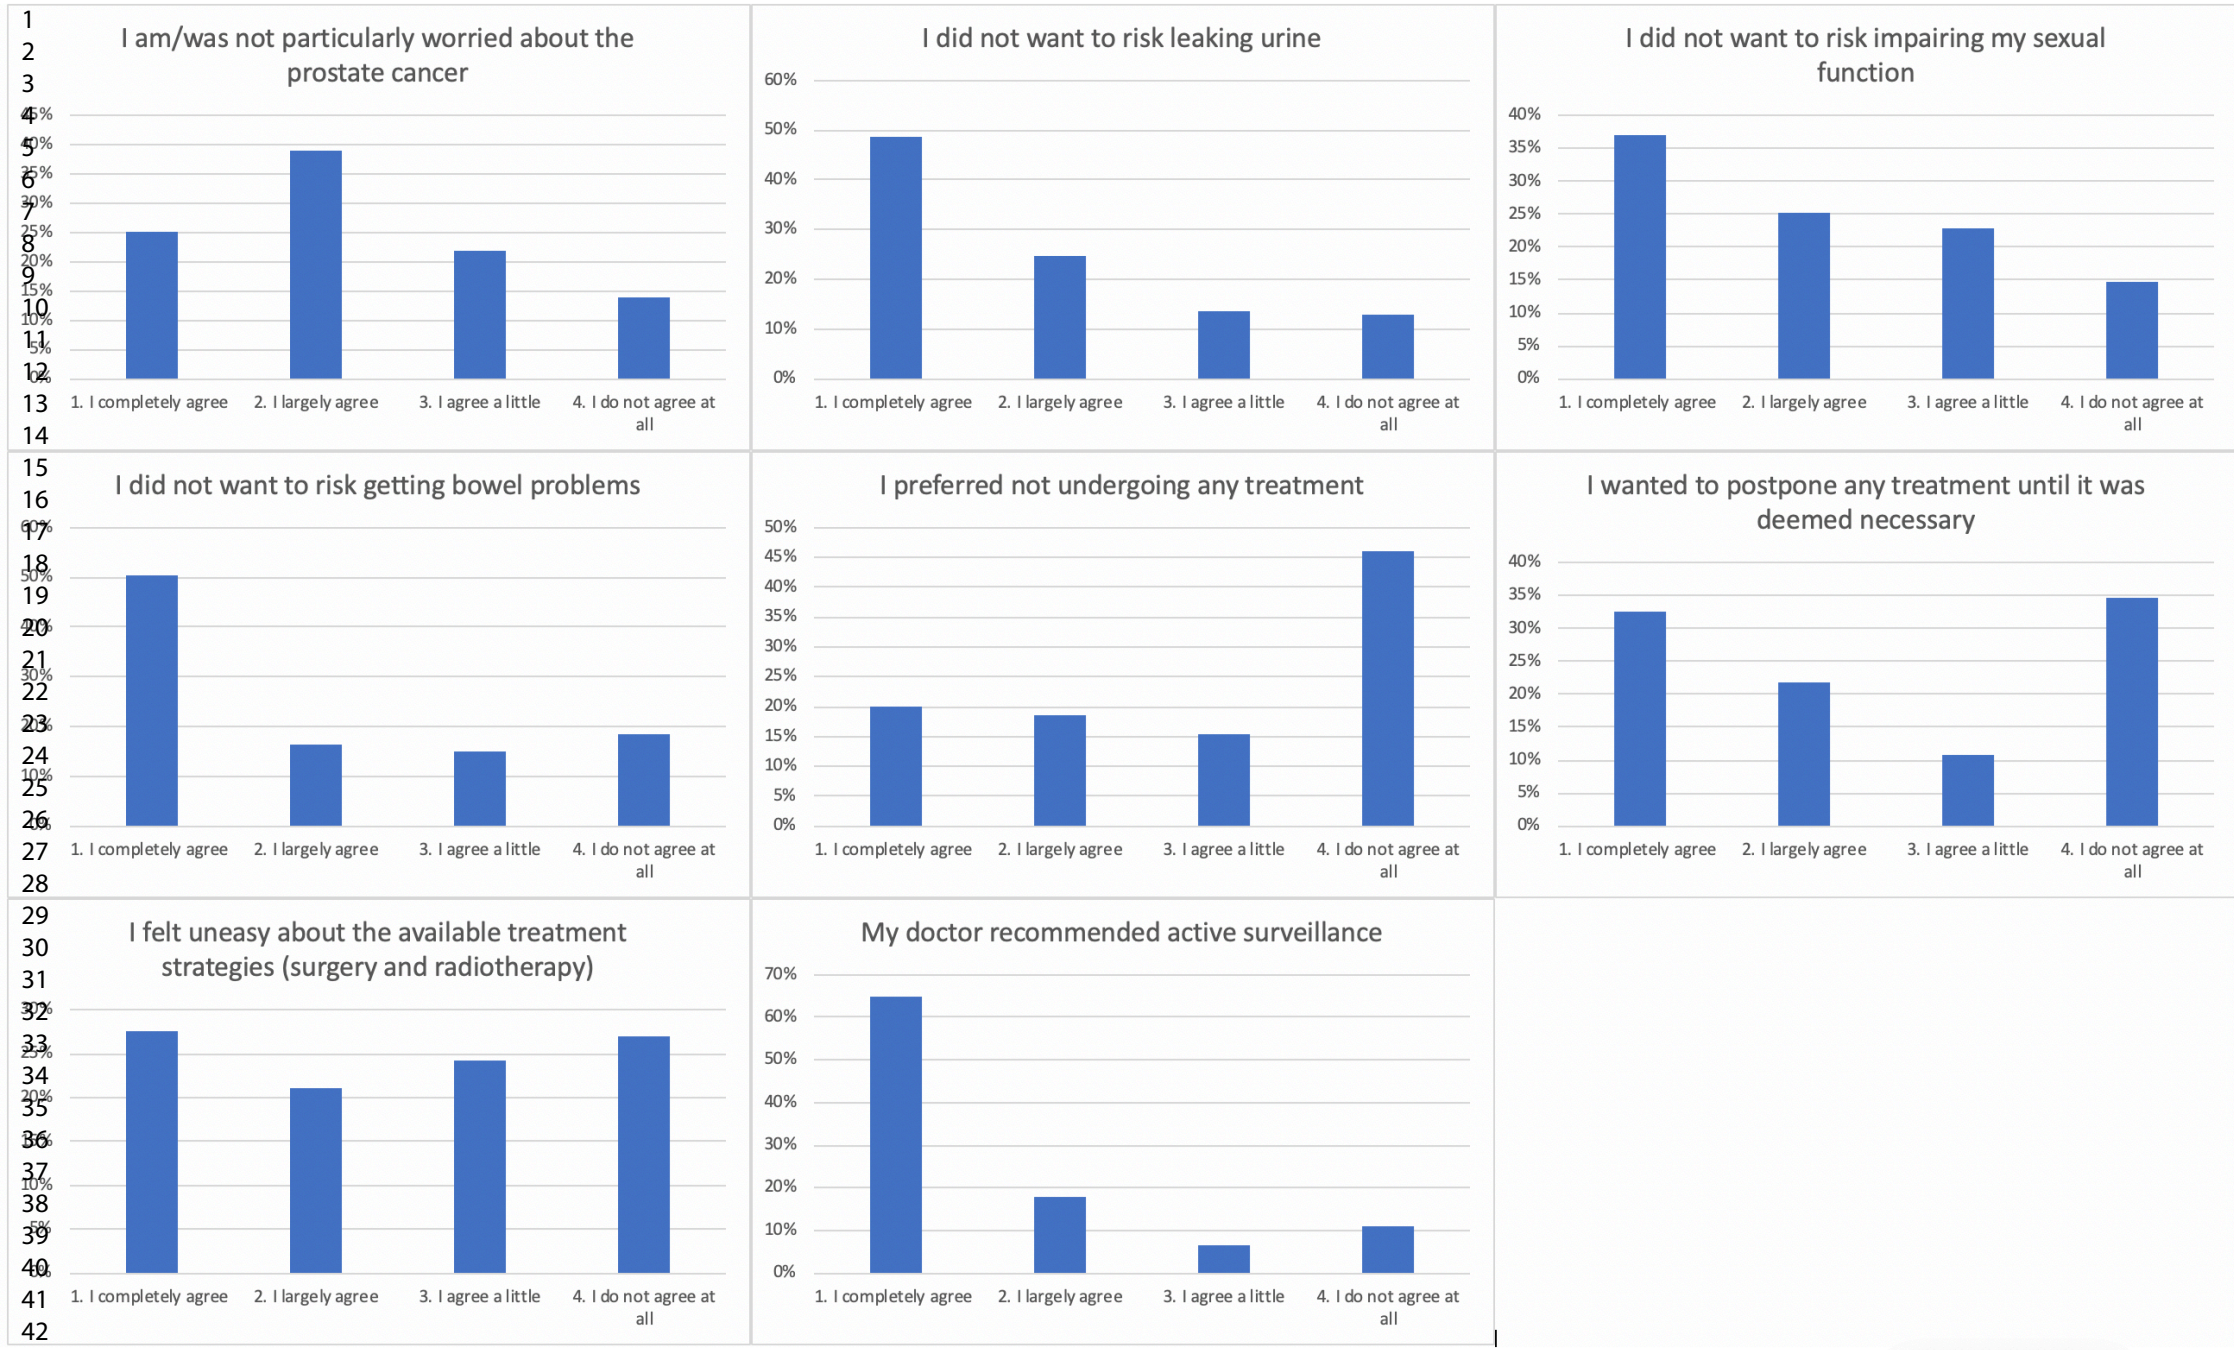

43  
44  
45  
46

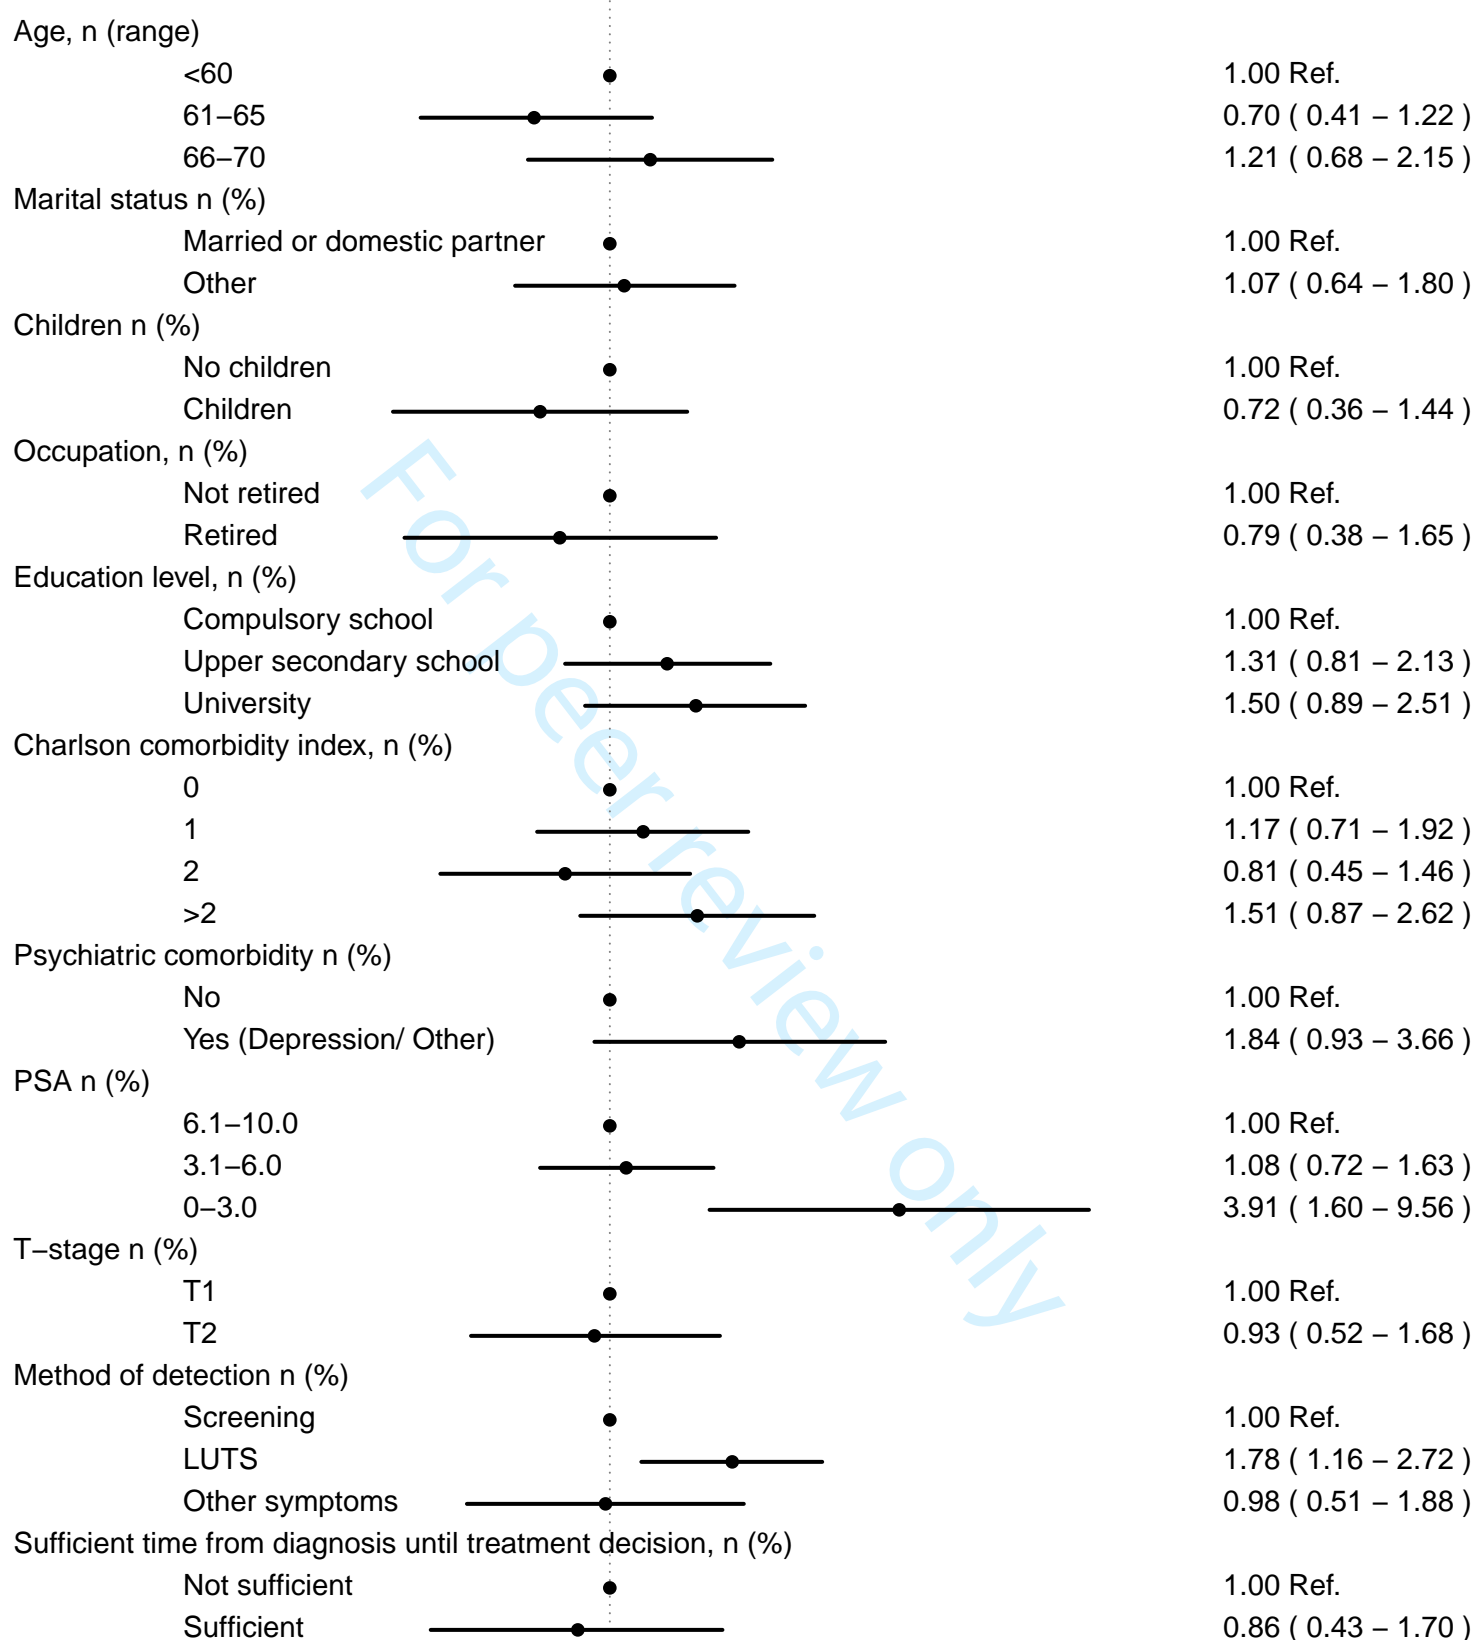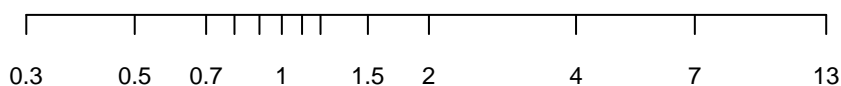

Odds ratio

Figure 5 - direct question on why the men diverted from active surveillance

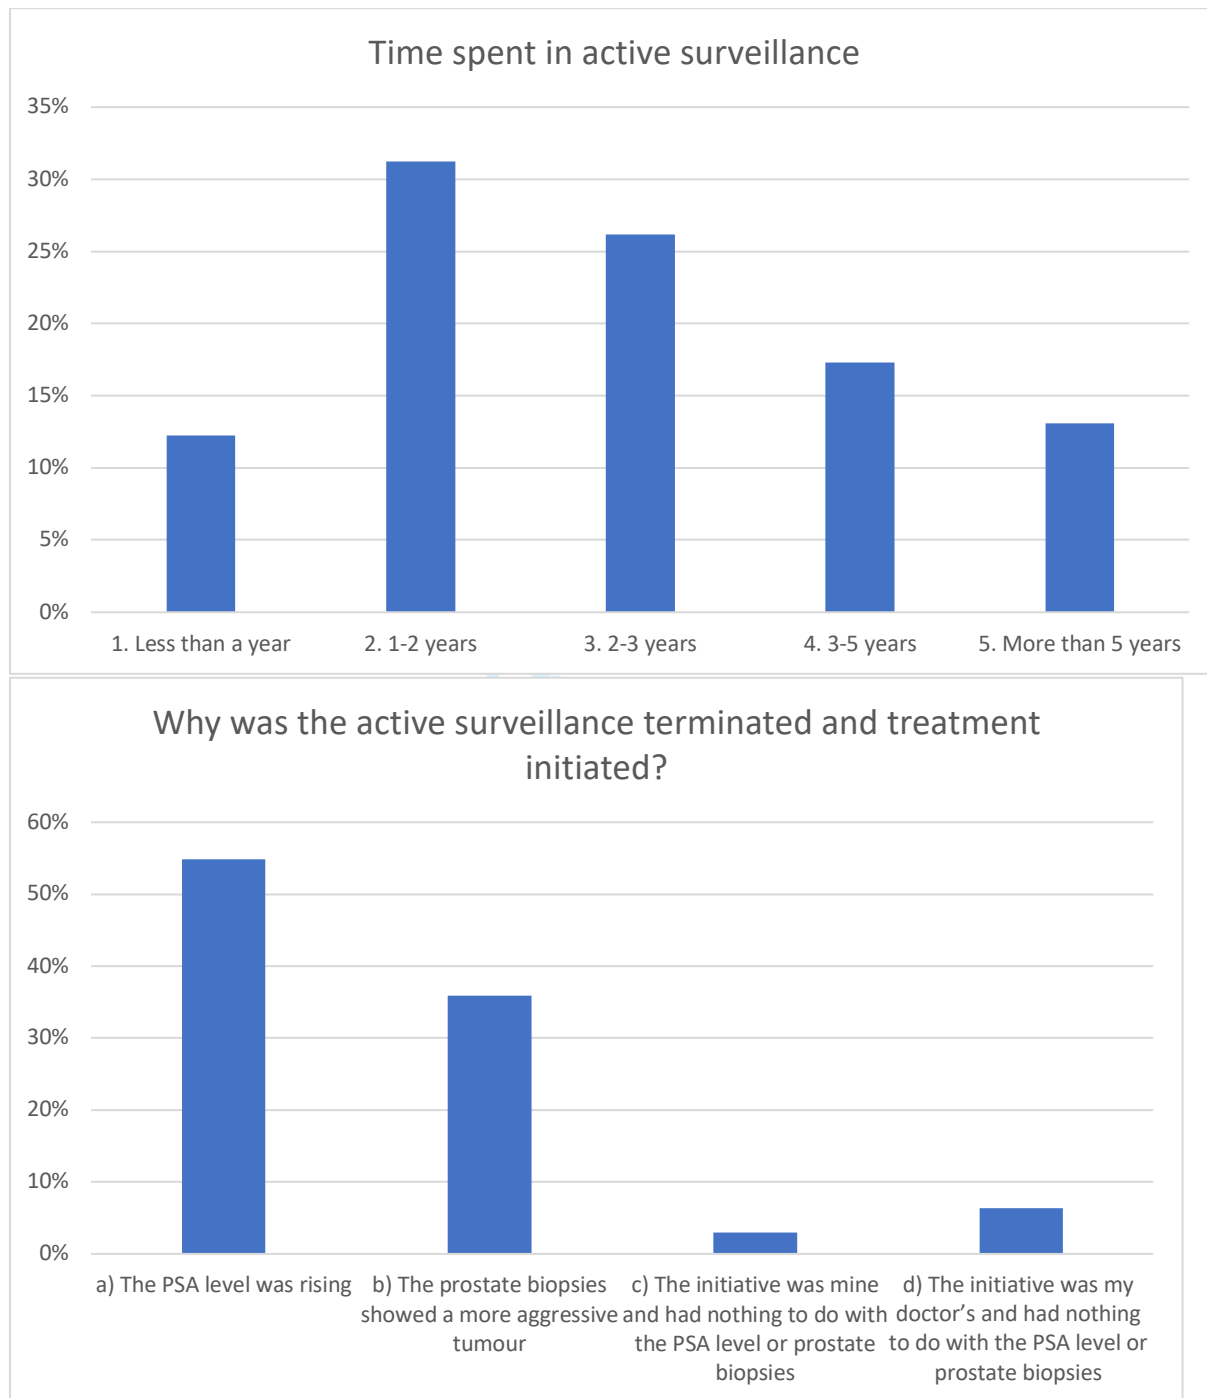



## Health and Quality of Life in Men with Prostate Cancer

Thank you for taking part in this study.

A number of questions follow below (58 questions in part 1 and 17 questions in part 2). Provide the answers that best describe you and your situation. If more than one alternative is possible, the question will indicate as much. Please try to answer all the questions.

PLEASE OBSERVE that the term “active surveillance” is used in this questionnaire.

“Active surveillance” is a conservative treatment strategy for men with low-risk prostate cancer that involves close monitoring of the disease using PSA tests and repeat biopsies. When there are signs of disease progression, the patient receives curative treatment through surgery or radiotherapy. A patient is not in active surveillance if:

- 1) A decision to treat the prostate cancer by surgery or radiotherapy is taken within six months from the prostate cancer diagnosis.
- 2) Being monitored after having received treatment of any kind.

1  
2  
3 **PART I. Demographics and questions about quality of life**  
4  
5

6 **General Questions**  
7

---

- 8  
9 1. In which year were you born?  
10 (Give four figures, e.g. 1945)

11  
12   
13

- 14  
15  
16 2. Are you currently:

- 17  Living with spouse or partner  
18  Not in a significant relationship  
19  In a significant relationship, but not living together  
20  
21

- 22  
23 3. Do you have children?

- 24  No  Yes  
25  
26

- 27  
28 4. Do you have grandchildren?

- 29  No  Yes  
30  
31

- 32  
33 5. Are you currently:

- 34  Employed  
35  Looking for work  
36  Retired  
37  On long-term sick leave  
38  On disability pension  
39  
40

- 41  
42 6. What is the highest level of your education?

- 43  Basic education or equivalent  
44  Upper secondary, vocational school or equivalent  
45  College or university  
46  
47

- 48  
49 7. **During the last 4 weeks**, how many hours per have you undertaken at least moderate physical  
50 exercise involving an elevated pulse rate (i.e. walking, cycling, swimming, etc.)?

- 51  None  
52  Less than 1 hour per week  
53  1-3 hours per week  
54  More than 3 and up to 7 hours per week  
55  More than 7 hours per week  
56  
57

- 58  
59 8. What are your smoking habits? (*Only pick one answer*)  
60



- Smoke everyday
- Smoke occasionally (less than 1 cigarette per day)
- Former smoker
- Never smoked

9. How many units of alcohol (see example below) do you typically drink on a day when you drink alcohol?

- 0 units of alcohol per week
- 1-5 units of alcohol per week
- 6-10 units of alcohol per week
- 11-20 units of alcohol per week
- More than 20 units of alcohol per week

In the UK, one unit of alcohol is for example:

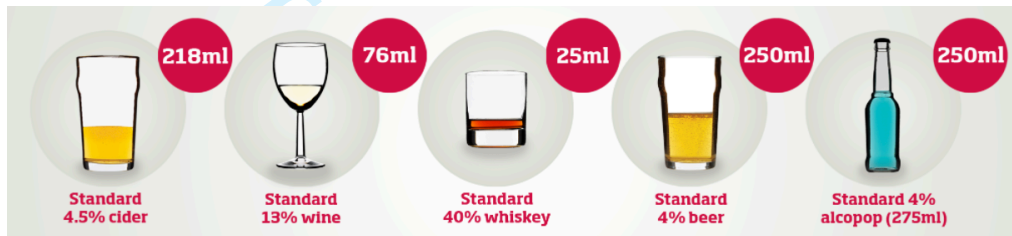

10. How tall are you?

cm

11. How much do you weigh?

kg

12. Do you have or have you ever had any of the following illnesses? If so, which? (Tick the appropriate box for each question)

- A. Heart disease (e.g. angina, heart attack, or heart failure)  No  Yes
- B. High blood pressure  No  Yes
- C. Pains in the legs when walking owing to poor blood circulation No  Yes
- D. Lung disease (e.g. asthma, chronic bronchitis, or chronic obstructive pulmonary disease (COPD))  No  Yes
- E. Diabetes  No  Yes
- F. Kidney disease  No  Yes

- 1  
2  
3 G. Liver disease  No  Yes  
4  
5 H. Stroke  No  Yes  
6  
7 I. Neurological disease (e.g. Parkinson's disease or MS)  No  Yes  
8  
9 J. Other type of cancer than prostate cancer (in the last 5 years)  No  Yes  
10  
11 K. Depression  No  Yes  
12  
13 L. Other psychological illness  No  Yes  
14  
15 M. Rheumatism  No  Yes  
16  
17 N. Paralysis  No  Yes  
18  
19 O. HIV+ or AIDS  No  Yes  
20  
21

22 (modified from Charlson Comorbidity index Chaudhry et al 2005)  
23  
24  
25  
26  
27

### 28 Questions About Quality of Life

---

29 Answer the following questions by circling the number that best fits your opinion.  
30  
31

32  
33 13. **During the last 4 weeks**, what has your quality of life been like?  
34

35 1-----2-----3-----4-----5-----6-----7  
36 No quality of life Best possible quality of life  
37  
38

39  
40 14. **During the last 4 weeks**, has your life felt meaningful?  
41

42 1-----2-----3-----4-----5-----6-----7  
43 Never All the time  
44  
45

46  
47 15. **During the last 4 weeks**, what has your physical stamina been like?  
48

49 1-----2-----3-----4-----5-----6-----7  
50 No stamina Best possible stamina  
51  
52

53  
54 16. **During the last 4 weeks**, what has your mental wellbeing been like?  
55

56 1-----2-----3-----4-----5-----6-----7  
57 No wellbeing Best possible wellbeing  
58  
59  
60

17. **During the last 4 weeks**, what has your physical health been like?

1-----2-----3-----4-----5-----6-----7  
 Worst imaginable health Best imaginable health

18. **During the last 4 weeks**, what has your self-esteem been like?

1-----2-----3-----4-----5-----6-----7  
 No self-esteem Best imaginable self-esteem

**Questions About Depression and Anxiety**

---

19. **During the last 4 weeks**, have you felt miserable or depressed?

1-----2-----3-----4-----5-----6-----7  
 Never All the time

20. **During the last 4 weeks**, have you experienced worry or anxiety?

1-----2-----3-----4-----5-----6-----7  
 Never All the time

21. **During the last 4 weeks**, have you had difficulties sleeping at night?

- No, never
- Yes, at least once this month
- Yes, at least once a week
- Yes, at least 3 times per week
- Yes, every night

22. **During the last 4 weeks**, have you woken during the night with feelings of worry or anxiety?

- No, never
- Yes, at least once this month
- Yes, at least once a week
- Yes, at least 3 times per week
- Yes, every night

23. **During the last 4 weeks**, have you taken any preparations to help you sleep?

- No, never
- Yes, at least once this month
- Yes, at least once a week
- Yes, at least 3 times per week

Yes, every evening

24. **During the last 4 weeks**, have you taken any tranquilizers (anti-anxiety medications)?

- No, never  
 Yes, at least once this month  
 Yes, at least once a week  
 Yes, at least 3 times per week  
 Yes, every day

25. **During the last 4 weeks**, have you taken any anti-depressives, i.e medication against feeling low or depressed?

No  Yes

### Questions About Information and Decision on Treatment

---

26. I was informed about my prostate cancer:

- At a meeting in person  
 By telephone  
 By mail  
 In another way, which? \_\_\_\_\_

27. When you were informed about your prostate cancer, were you informed in a good way?  
 (Circle the number which best describes you or your situation)

1-----2-----3-----4-----5-----6-----7  
 Worst imaginable way Best imaginable way

28. Did you have a friend or relative with you when you were informed about your prostate cancer?

No  Yes

29. How much information have you received from your doctor? (For each row, tick the box that best describes your perception)

|                                                        | No Information           | Little Information       | Quite a lot of Information | A great deal of Information |
|--------------------------------------------------------|--------------------------|--------------------------|----------------------------|-----------------------------|
| A. About prostate cancer – the illness and its course  | <input type="checkbox"/> | <input type="checkbox"/> | <input type="checkbox"/>   | <input type="checkbox"/>    |
| B. About various treatment options for prostate cancer | <input type="checkbox"/> | <input type="checkbox"/> | <input type="checkbox"/>   | <input type="checkbox"/>    |

- 1  
2  
3  
4  
5  
6  
7  
8  
9  
10
- C. About side effects of the various treatment options
- D. About how the various treatments could affect your quality of life

11  
12  
13  
14

30. Which treatment options were suitable to you, according to your perception of the information you received from your doctor? (Multiple answers are possible)

- 15  
16  
17  
18  
19  
20  
21
- Active surveillance (go to checks with PSA tests and MRI examinations, treatment will become relevant if the cancer becomes more serious)
- Surgical removal of the prostate (radical prostatectomy)
- Radiotherapy
- Other treatment, please specify: \_\_\_\_\_

22  
23  
24

31. How much did you influence the treatment decision-making?

- 25  
26  
27  
28  
29
- Not at all
- A little
- Moderately
- Very much

30  
31  
32  
33

32. Are you satisfied with how much you were involved in the decision-making between radiotherapy, surgery or active surveillance?

- 34  
35  
36  
37  
38
- No, I wish I had been less involved in the decision-making
- No, I wish I had been more involved in the decision-making
- Yes, I am satisfied with how much I was involved in the decision-making

39  
40  
41

33. How much time passed between your prostate cancer diagnosis and the treatment decision-making?

- 42  
43  
44  
45  
46
- The treatment decision was made right after I received my diagnosis
- 1-4 weeks
- 2-3 months
- More than 3 months

47  
48  
49

34. In your opinion, were you given enough time to think before the treatment decision was made?

- 50  
51  
52  
53
- No, I wish I had been given less time before the decision was made
- No, I wish I had been given more time before the decision was made
- Yes, I was given enough time before the decision was made

54  
55  
56  
57

35. In your opinion, did the right amount of time pass between the treatment decision-making and the treatment start?

- 58  
59  
60
- Not applicable, I have not received treatment for my prostate cancer
- No, I wish there had been less time between the treatment decision-making and the treatment start

- 1  
2  
3  
4  
5  
6  
7  
8  
9  
10  
11  
12  
13  
14  
15  
16  
17  
18  
19  
20  
21  
22  
23  
24  
25  
26  
27  
28  
29  
30  
31  
32  
33  
34  
35  
36  
37  
38  
39  
40  
41  
42  
43  
44  
45  
46  
47  
48  
49  
50  
51  
52  
53  
54  
55  
56  
57  
58  
59  
60
- No, I wish there had been more time between treatment decision and treatment start
- Yes, I am satisfied with the amount of time that passed between treatment decision-making and the treatment start
36. What type of doctor(s) did you discuss your prostate cancer with before the treatment decision was made?
- Urologist (doctor that performs prostate cancer surgery)
- Oncologist (doctor that gives radiotherapy treatment)
- Other type of doctor
37. Do you have access to a nurse navigator?
- No     Yes     I don't know
38. Where have you searched for information about prostate cancer? (NB! Several alternatives possible.)
- I have not searched for information about prostate cancer
- Internet
- Radio
- TV
- Newspapers
- Patient brochures
- Patients association
- Friends or family
- If elsewhere, please specify: \_\_\_\_\_

### Questions About Your Treatment

---

39. Which alternatives below describes your situation? (Cross of one alternative)
- I am currently on active surveillance (i.e. my prostate cancer is closely monitored using PSA tests and repeat biopsies and curative treatment is initiated if the disease progresses)
- I started on active surveillance but have since received curative treatment
- I received treatment directly (within 6 months from my prostate cancer diagnosis)
40. If you have received treatment for prostate cancer, which treatment(s) have you received up to date?
- (NB! Several alternatives are possible. You may, for example, have undergone an operation and radiotherapy, radiotherapy and hormone treatment, or just hormone treatment.)
- I have not had any treatment, I am on active surveillance
- Removal of the whole prostate gland (so-called radical prostatectomy)
- Radiotherapy of the prostate gland
- Hormone treatment in connection with radiotherapy of the prostate gland
- Only hormone treatment by injection (so-called GnRH-analogue)
- Only hormone treatment with pills (e.g. Bicalutamide, or Casodex)

Testicles have been removed by means of operation

41. If you were on active surveillance for prostate cancer but later received treatment, or if you are still on active surveillance - which of the following alternative(s) influenced the decision?

Not applicable, I was never on active surveillance, I received treatment directly

A. I am/was not particularly worried about the prostate cancer

- I completely agree
- I largely agree
- I agree a little
- I do not agree at all

B. I did not want to risk leaking urine

- I completely agree
- I largely agree
- I agree a little
- I do not agree at all

C. I did not want to risk impairing my sexual function

- I completely agree
- I largely agree
- I agree a little
- I do not agree at all

D. I did not want to risk getting bowel problems

- I completely agree
- I largely agree
- I agree a little
- I do not agree at all

E. I preferred not undergoing any treatment

- I completely agree
- I largely agree
- I agree a little
- I do not agree at all

F. I wanted to postpone any treatment until it was deemed necessary

- I completely agree
- I largely agree
- I agree a little
- I do not agree at all

G. I felt uneasy about the available treatment strategies (surgery and radiotherapy)

- I completely agree
- I largely agree
- I agree a little

I do not agree at all

**H. My doctor recommended active surveillance**

I completely agree

I largely agree

I agree a little

I do not agree at all

42. What do you believe will happen in the future when it comes to your prostate cancer? (Cross of one alternative.)

I believe that my disease will progress/recur and require treatment within 2 years

I believe that my disease will progress/recur and require treatment within 5 years

I believe that my disease will progress/recur and require treatment within 10 years

I believe that my disease is harmless

43. If you were on active surveillance but then received treatment, please answer the following questions (A to C).

Not applicable, I was never on active surveillance, I received treatment directly

**A. For how long were you on active surveillance?**

Less than a year

1-2 years

2-3 years

3-5 years

More than 5 years

**B. Why was the active surveillance terminated and treatment initiated? (NB! Several alternatives possible.)**

The PSA level was rising

The prostate biopsies showed a more aggressive tumour

The initiative was mine and had nothing to do with the PSA level or prostate biopsies

The initiative was my doctor's and had nothing to do with the PSA level or prostate biopsies

If other reason, please specify: \_\_\_\_\_

**C. If it was your initiative to terminate active surveillance and start treatment but the reason for this was not that the tumour was progressing, what was the reason: (NB! Several alternatives possible.)**

I was worried

My partner was worried

My friends were worried

I wanted to avoid further biopsies

I wanted to avoid the repeated PSA tests

I just wanted to have treatment done

Other reason



If other reason, please describe it:

---

---

44. Are you worried that your medical problems, if you have any, are related to prostate cancer?

- Not at all
- A little
- Moderately
- Very much

45. Do you believe that you will die from prostate cancer?

- No
- Yes

46. Have you told anyone about your prostate cancer? (NB! Several alternatives possible.)

- I have not told anyone about my prostate cancer
- Partner
- Children
- Grandchildren
- Close friend(s)
- Colleague(s)
- Other person(s)

47. If you are concerned about telling others about your prostate cancer, what are the reasons for this? (NB! Several alternatives possible.)

- Not applicable, I do not hesitate to tell others about the prostate cancer
- It felt too private
- I did not want to worry others
- I believe that people would act differently towards me if I told them about the prostate cancer
- I believe that telling others would affect my career
- Other reason

If other reason, please describe it:

---

---

### Questions About Your Prostate Cancer Checks

---

48. Who monitors your prostate cancer? (NB! Several alternatives possible.)

- Doctor
- Nurse

1  
2  
3  
4  
5 49. When was your last prostate cancer check?  
6

- 7  Less than one week ago  
8  Less than one month ago  
9  Less than three months ago  
10  More than three months ago  
11  
12

13  
14 50. When did you last take a PSA test?  
15

- 16  Less than one week ago  
17  1-4 weeks ago  
18  1-3 months ago  
19  More than three months ago  
20

21 51. When is your next scheduled PSA test?  
22

- 23  In less than one week  
24  In 1-4 weeks  
25  In more than one month  
26  I don't know  
27  
28

29 52. In connection with your prostate cancer check, do you feel reminded of your cancer disease?  
30

- 31  Not at all  
32  A little  
33  Moderately  
34  Very much  
35  
36

37 53. In connections with your prostate cancer check, do you feel worried about what the PSA test will show?  
38

- 39  Not at all  
40  A little  
41  Moderately  
42  Very much  
43  
44

45 54. In connection with your prostate cancer checks, do you feel worried about needing to take new tissue  
46 samples (biopsies) from your prostate (if you are on active surveillance)?  
47

- 48  Not applicable, I have received treatment for prostate cancer  
49  Not at all  
50  A little  
51  Moderately  
52  Very much  
53  
54

55 55. In connection with your prostate cancer check, do you feel worried that your prostate cancer has  
56 spread (metastasized) to a different part of your body?  
57

- 58  Not at all  
59  
60

- A little  
 Moderately  
 Very much

56. If you feel worried in connection with your prostate cancer check, how long does the worry last?

- Not applicable, I am not worried before the prostate cancer check  
 Only a day or so, at the time of the prostate cancer check  
 From the day I receive the invitation to the time of the prostate cancer check  
 From before I receive the invitation  
 I am always, more or less, worried

57. Has your prostate cancer diagnosis had an affect on your life style in any way, and if so, in what areas?

- A. Type of food**       I eat less healthy       Unchanged       I eat healthier  
**B. Exercise**       I exercise less       Unchanged       I exercise more  
**C. Interest in social activities/relationships**       Less       Unchanged       More  
**D. Interest in religion/philosophy**       Less       Unchanged       More

58. How has prostate cancer affected your economic situation?

- Impaired  
 Unchanged  
 Improved

## PART II. Questionnaire for Symptoms (EPIC-26)

The next few questions concern problems you may be experiencing.

(Tick the appropriate box for each question)

I. **Over the past 4 weeks**, how often has your urine leaked?

- More than once a day  
 About once a day  
 More than once a week  
 About once a week  
 Rarely or never

- 1  
2  
3 2. Which of the following alternatives best describes how well you have been able to control your  
4 urinating **during the last 4 weeks?**  
5  
6  No urinary control whatsoever  
7  Drip all the time  
8  Drip a little occasionally  
9  Full control  
10  
11  
12  
13 3. On average **over the last 4 weeks**, how many incontinence pads or adult diapers have you used  
14 per day owing to urine leakage?  
15  
16  None  
17  1 per day  
18  2 per day  
19  3 or more per day  
20  
21  
22  
23 4. How large a problem, if any, have the following symptoms been **during the last 4 weeks?**  
24 *(Cross of one alternative for each sub-question.)*  
25  
26 

|                                    | None                     | Very Little              | Little                   | Moderate                 | Large                    |
|------------------------------------|--------------------------|--------------------------|--------------------------|--------------------------|--------------------------|
| 29 A. Dripping or leaking urine    | <input type="checkbox"/> |
| 30 B. Pain or burning on urination | <input type="checkbox"/> |
| 31 C. Bleeding with urination      | <input type="checkbox"/> |
| 32 D. Weak urine stream or         |                          |                          |                          |                          |                          |
| 33 incomplete emptying             | <input type="checkbox"/> |
| 34 E. Need to urinate frequently   |                          |                          |                          |                          |                          |
| 35 during the day                  | <input type="checkbox"/> |

  
36  
37  
38  
39  
40  
41  
42 5. Overall, how large a problem has urination been for you **during the last 4 weeks?** *(Tick the box that*  
43 *best describes your perception.)*  
44  
45  No problem  
46  Very little problem  
47  Little problem  
48  Moderate problem  
49  Large problem  
50  
51  
52  
53 6. How large a problem, if any, have the following symptoms been for you?  
54 *(Cross of one alternative for each sub-question.)*  
55  
56  
57 

|  | None | Very Little | Little | Moderate | Large |
|--|------|-------------|--------|----------|-------|
|--|------|-------------|--------|----------|-------|

  
58  
59  
60

- A. Urgent need to empty the bowel immediately
- B. Need to empty the bowel often
- C. Inability to control the bowel function
- D. Bloody in faeces
- E. Abdominal/pelvic/rectal pain

7. Overall, how large a problem has your bowel emptying been for you **during the last 4 weeks?** (Tick the box that best describes your perception.)

- No problem
- Very little problem
- Little problem
- Moderate problem
- Large problem

8. How would you rate each of the following **during the last 4 weeks?** (Cross of one alternative for each sub-question.)

- |                                             | Very Poor<br>to Non-existent | Poor                     | Moderate                 | Good                     | Very Good                |
|---------------------------------------------|------------------------------|--------------------------|--------------------------|--------------------------|--------------------------|
| A. Your ability to get an erection          | <input type="checkbox"/>     | <input type="checkbox"/> | <input type="checkbox"/> | <input type="checkbox"/> | <input type="checkbox"/> |
| B. Your ability to achieve orgasm (climax)? | <input type="checkbox"/>     | <input type="checkbox"/> | <input type="checkbox"/> | <input type="checkbox"/> | <input type="checkbox"/> |

9. How would you describe the usual quality of your erections **during the last 4 weeks?** (Tick the box that best describes your perception.)

- None at all
- Not firm enough for any sexual activity
- Firm enough for masturbation and foreplay only
- Firm enough for intercourse

10. How would you describe the frequency of your erections **during the last 4 weeks?** (Tick the box that best describes your perception.)

- I NEVER obtained an erection when desired
- Less than half of the times I wanted an erection
- Around half of the times I wanted an erection
- More than half of the times I wanted an erection
- Whenever I wanted an erection

11. Overall, how would you rate your sexual capability **during the last 4 weeks?**

## 12. (Tick the box that best describes your perception.)

- Very poor  
 Poor  
 Moderate  
 Good  
 Very good

12. How large a problem have you had with your sexual capability **during the last 4 weeks?**  
(Tick the box that best describes your perception)

- No problem  
 Very little problem  
 Little problem  
 Moderate problem  
 Large problem

13. How large a problem, if any, have the following symptoms been for you during the last 4 weeks?  
(Cross of one alternative for each sub-question)

|                                     | None                     | Very little problem      | Little problem           | Moderate problem         | Large problem            |
|-------------------------------------|--------------------------|--------------------------|--------------------------|--------------------------|--------------------------|
| A. Hot flushes                      | <input type="checkbox"/> |
| B. Tenderness/<br>swelling in chest | <input type="checkbox"/> |
| C. Feeling low                      | <input type="checkbox"/> |
| D. Lacking energy                   | <input type="checkbox"/> |
| E. Change in body weight            | <input type="checkbox"/> |

## 14. Which of the following medications/sexual aids have you tried and how did they work? (Cross of one alternative for each sub-question)

|                                                                                                      | Have not tried           | Tried but it did not help | Helped but not using it now | Helps and I use it now and then | Helps and I always use it in connection with sexual activity |
|------------------------------------------------------------------------------------------------------|--------------------------|---------------------------|-----------------------------|---------------------------------|--------------------------------------------------------------|
| A. Viagra, Sildenafil, Cialis, Levitra or other medications? If other pills, please give name: _____ | <input type="checkbox"/> | <input type="checkbox"/>  | <input type="checkbox"/>    | <input type="checkbox"/>        | <input type="checkbox"/>                                     |
| B. Bondil (gel in urethra)?                                                                          | <input type="checkbox"/> | <input type="checkbox"/>  | <input type="checkbox"/>    | <input type="checkbox"/>        | <input type="checkbox"/>                                     |
| C. Caverject (injection in the penis)?                                                               | <input type="checkbox"/> | <input type="checkbox"/>  | <input type="checkbox"/>    | <input type="checkbox"/>        | <input type="checkbox"/>                                     |
| D. Vacuum pump?                                                                                      | <input type="checkbox"/> | <input type="checkbox"/>  | <input type="checkbox"/>    | <input type="checkbox"/>        | <input type="checkbox"/>                                     |
| E. Other? If so, please state what: _____                                                            | <input type="checkbox"/> | <input type="checkbox"/>  | <input type="checkbox"/>    | <input type="checkbox"/>        | <input type="checkbox"/>                                     |

15. How long did your erection usually last with the aid of medication/sexual aid during the last 4 weeks?  
(Tick the box that best describes your perception)

- Not relevant, I do not use medications or sexual aids

- Non-existent
- Insufficient for any kind of sexual activity
- Sufficient for masturbation and foreplay
- Sufficient for intercourse

16. **Are you satisfied with your sexual life?**  
*(Circle the number which best describes you or your situation)*

1-----2-----3-----4-----5-----6-----7  
 Not at all satisfied Completely satisfied

**Finally, we would like to ask you**

17. **Overall, how satisfied are you with the medical care you have received as a prostate cancer patient?**  
 (Personalised service, information, etc.)

*(Circle the number which best describes you or your situation)*

1-----2-----3-----4-----5-----6-----7  
 Not satisfied at all Completely satisfied

Is there anything else that you think is important concerning your illness that we have failed to ask about? Please write and tell us!

---



---



---

**THANK YOU FOR YOUR ANSWERS!**

| Appendix 2 – Drop-out analysis            | No questioner data (n=432) |        | Questioner data (n=1288) |        | Received questioner (n=1720) |        | Fisher's exact test |
|-------------------------------------------|----------------------------|--------|--------------------------|--------|------------------------------|--------|---------------------|
| <b>Age, n (%)</b>                         |                            |        |                          |        |                              |        |                     |
| ≤50                                       | 17                         | (3.9)  | 39                       | (3.0)  | 56                           | (3.3)  | 0.003               |
| 51-60                                     | 170                        | (39.4) | 401                      | (31.1) | 571                          | (33.2) |                     |
| 61-65                                     | 128                        | (29.6) | 488                      | (37.9) | 616                          | (35.8) |                     |
| 66-70                                     | 117                        | (27.1) | 360                      | (28.0) | 477                          | (27.7) |                     |
| <b>T-stage, n (%)</b>                     |                            |        |                          |        |                              |        |                     |
| T1a                                       | 25                         | (5.8)  | 45                       | (3.5)  | 70                           | (4.1)  | 0.04                |
| T1b                                       | 6                          | (1.4)  | 8                        | (0.6)  | 14                           | (0.8)  |                     |
| T1c                                       | 320                        | (74.1) | 953                      | (74.0) | 1273                         | (74.0) |                     |
| T2                                        | 81                         | (18.8) | 282                      | (21.9) | 363                          | (21.1) |                     |
| <b>PSA, n (%)</b>                         |                            |        |                          |        |                              |        |                     |
| ≤3                                        | 48                         | (11.1) | 72                       | (5.6)  | 120                          | (7.0)  | <0.001              |
| 3.1-7                                     | 292                        | (67.6) | 922                      | (71.6) | 1214                         | (70.6) |                     |
| 7.1-10                                    | 92                         | (21.3) | 294                      | (22.8) | 386                          | (22.4) |                     |
| <b>Proportion positive cores, n (%)</b>   |                            |        |                          |        |                              |        |                     |
| ≤12.5%                                    | 137                        | (31.7) | 378                      | (29.3) | 515                          | (29.9) | 0.15                |
| 12.5-25%                                  | 107                        | (24.8) | 380                      | (29.5) | 487                          | (28.3) |                     |
| 25.1-50%                                  | 126                        | (29.2) | 359                      | (27.9) | 485                          | (28.2) |                     |
| >50%                                      | 27                         | (6.2)  | 111                      | (8.6)  | 138                          | (8.0)  |                     |
| Missing data                              | 35                         | (8.1)  | 60                       | (4.7)  | 95                           | (5.5)  |                     |
| <b>Mode of detection, n (%)</b>           |                            |        |                          |        |                              |        |                     |
| Screening                                 | 203                        | (47.0) | 709                      | (55.0) | 912                          | (53.0) | 0.024               |
| LUTS                                      | 145                        | (33.6) | 377                      | (29.3) | 522                          | (30.3) |                     |
| Other symptoms                            | 64                         | (14.8) | 160                      | (12.4) | 224                          | (13.0) |                     |
| Missing data                              | 20                         | (4.6)  | 42                       | (3.3)  | 62                           | (3.6)  |                     |
| <b>Treatment according to NPCR, n (%)</b> |                            |        |                          |        |                              |        |                     |
| AS                                        | 202                        | (46.8) | 476                      | (37.0) | 678                          | (39.4) | 0.002               |
| RP                                        | 187                        | (43.3) | 660                      | (51.2) | 847                          | (49.2) |                     |
| RT                                        | 43                         | (10.0) | 152                      | (11.8) | 195                          | (11.3) |                     |



**STROBE 2007 (v4) Statement—Checklist of items that should be included in reports of *cohort studies***

| Section/Topic                | Item # | Recommendation                                                                                                                                                                       | Reported on page # |
|------------------------------|--------|--------------------------------------------------------------------------------------------------------------------------------------------------------------------------------------|--------------------|
| <b>Title and abstract</b>    | 1      | (a) Indicate the study's design with a commonly used term in the title or the abstract                                                                                               | 1                  |
|                              |        | (b) Provide in the abstract an informative and balanced summary of what was done and what was found                                                                                  | 2                  |
| <b>Introduction</b>          |        |                                                                                                                                                                                      |                    |
| Background/rationale         | 2      | Explain the scientific background and rationale for the investigation being reported                                                                                                 | 4                  |
| Objectives                   | 3      | State specific objectives, including any prespecified hypotheses                                                                                                                     | 4                  |
| <b>Methods</b>               |        |                                                                                                                                                                                      |                    |
| Study design                 | 4      | Present key elements of study design early in the paper                                                                                                                              | 4                  |
| Setting                      | 5      | Describe the setting, locations, and relevant dates, including periods of recruitment, exposure, follow-up, and data collection                                                      | 5                  |
| Participants                 | 6      | (a) Give the eligibility criteria, and the sources and methods of selection of participants. Describe methods of follow-up                                                           | 5                  |
|                              |        | (b) For matched studies, give matching criteria and number of exposed and unexposed                                                                                                  |                    |
| Variables                    | 7      | Clearly define all outcomes, exposures, predictors, potential confounders, and effect modifiers. Give diagnostic criteria, if applicable                                             | 5-6                |
| Data sources/<br>measurement | 8*     | For each variable of interest, give sources of data and details of methods of assessment (measurement). Describe comparability of assessment methods if there is more than one group | 7                  |
| Bias                         | 9      | Describe any efforts to address potential sources of bias                                                                                                                            | 7-8                |
| Study size                   | 10     | Explain how the study size was arrived at                                                                                                                                            | 5                  |
| Quantitative variables       | 11     | Explain how quantitative variables were handled in the analyses. If applicable, describe which groupings were chosen and why                                                         | 7                  |
| Statistical methods          | 12     | (a) Describe all statistical methods, including those used to control for confounding                                                                                                | 7                  |
|                              |        | (b) Describe any methods used to examine subgroups and interactions                                                                                                                  | 7                  |
|                              |        | (c) Explain how missing data were addressed                                                                                                                                          | 7                  |
|                              |        | (d) If applicable, explain how loss to follow-up was addressed                                                                                                                       |                    |
|                              |        | (e) Describe any sensitivity analyses                                                                                                                                                |                    |
| <b>Results</b>               |        |                                                                                                                                                                                      |                    |

|                          |     |                                                                                                                                                                                                                                                                                                                                                                                                               |                                 |
|--------------------------|-----|---------------------------------------------------------------------------------------------------------------------------------------------------------------------------------------------------------------------------------------------------------------------------------------------------------------------------------------------------------------------------------------------------------------|---------------------------------|
| Participants             | 13* | (a) Report numbers of individuals at each stage of study—eg numbers potentially eligible, examined for eligibility, confirmed eligible, included in the study, completing follow-up, and analysed<br>(b) Give reasons for non-participation at each stage<br>(c) Consider use of a flow diagram                                                                                                               | 8<br><br>Figure 1               |
| Descriptive data         | 14* | (a) Give characteristics of study participants (eg demographic, clinical, social) and information on exposures and potential confounders<br>(b) Indicate number of participants with missing data for each variable of interest<br>(c) Summarise follow-up time (eg, average and total amount)                                                                                                                | Table 1<br><br>Table 1<br><br>8 |
| Outcome data             | 15* | Report numbers of outcome events or summary measures over time                                                                                                                                                                                                                                                                                                                                                | 8-10                            |
| Main results             | 16  | (a) Give unadjusted estimates and, if applicable, confounder-adjusted estimates and their precision (eg, 95% confidence interval). Make clear which confounders were adjusted for and why they were included<br>(b) Report category boundaries when continuous variables were categorized<br>(c) If relevant, consider translating estimates of relative risk into absolute risk for a meaningful time period | 7-10                            |
| Other analyses           | 17  | Report other analyses done—eg analyses of subgroups and interactions, and sensitivity analyses                                                                                                                                                                                                                                                                                                                | 8-10                            |
| <b>Discussion</b>        |     |                                                                                                                                                                                                                                                                                                                                                                                                               |                                 |
| Key results              | 18  | Summarise key results with reference to study objectives                                                                                                                                                                                                                                                                                                                                                      | 10                              |
| <b>Limitations</b>       |     |                                                                                                                                                                                                                                                                                                                                                                                                               |                                 |
| Interpretation           | 20  | Give a cautious overall interpretation of results considering objectives, limitations, multiplicity of analyses, results from similar studies, and other relevant evidence                                                                                                                                                                                                                                    | 10-13                           |
| Generalisability         | 21  | Discuss the generalisability (external validity) of the study results                                                                                                                                                                                                                                                                                                                                         | 13                              |
| <b>Other information</b> |     |                                                                                                                                                                                                                                                                                                                                                                                                               |                                 |
| Funding                  | 22  | Give the source of funding and the role of the funders for the present study and, if applicable, for the original study on which the present article is based                                                                                                                                                                                                                                                 | 15-16                           |

\*Give information separately for cases and controls in case-control studies and, if applicable, for exposed and unexposed groups in cohort and cross-sectional studies.

**Note:** An Explanation and Elaboration article discusses each checklist item and gives methodological background and published examples of transparent reporting. The STROBE checklist is best used in conjunction with this article (freely available on the Web sites of PLoS Medicine at <http://www.plosmedicine.org/>, Annals of Internal Medicine at <http://www.annals.org/>, and Epidemiology at <http://www.epidem.com/>). Information on the STROBE Initiative is available at [www.strobe-statement.org](http://www.strobe-statement.org).
