# Supplementary material for: Determinants for choosing and adhering to active surveillance for localised prostate cancer: a nationwide population-based study
Source: PubMed Central journal article supplement — BMJ Open. 2019 Dec 23;9(12):e033944. doi: 10.1136/bmjopen-2019-033944 (PMC7008427; doi:10.1136/bmjopen-2019-033944), 2019-12-23
Supplement: bmjopen-2019-033944supp002.pdf [file bmjopen-2019-033944supp002.pdf]

| Appendix 2 – Drop-out analysis            | No questioner data (n=432) |        | Questioner data (n=1288) |        | Received questioner (n=1720) |        | Fisher's exact test |
|-------------------------------------------|----------------------------|--------|--------------------------|--------|------------------------------|--------|---------------------|
| <b>Age, n (%)</b>                         |                            |        |                          |        |                              |        |                     |
| ≤50                                       | 17                         | (3.9)  | 39                       | (3.0)  | 56                           | (3.3)  | 0.003               |
| 51-60                                     | 170                        | (39.4) | 401                      | (31.1) | 571                          | (33.2) |                     |
| 61-65                                     | 128                        | (29.6) | 488                      | (37.9) | 616                          | (35.8) |                     |
| 66-70                                     | 117                        | (27.1) | 360                      | (28.0) | 477                          | (27.7) |                     |
| <b>T-stage, n (%)</b>                     |                            |        |                          |        |                              |        |                     |
| T1a                                       | 25                         | (5.8)  | 45                       | (3.5)  | 70                           | (4.1)  | 0.04                |
| T1b                                       | 6                          | (1.4)  | 8                        | (0.6)  | 14                           | (0.8)  |                     |
| T1c                                       | 320                        | (74.1) | 953                      | (74.0) | 1273                         | (74.0) |                     |
| T2                                        | 81                         | (18.8) | 282                      | (21.9) | 363                          | (21.1) |                     |
| <b>PSA, n (%)</b>                         |                            |        |                          |        |                              |        |                     |
| ≤3                                        | 48                         | (11.1) | 72                       | (5.6)  | 120                          | (7.0)  | <0.001              |
| 3.1-7                                     | 292                        | (67.6) | 922                      | (71.6) | 1214                         | (70.6) |                     |
| 7.1-10                                    | 92                         | (21.3) | 294                      | (22.8) | 386                          | (22.4) |                     |
| <b>Proportion positive cores, n (%)</b>   |                            |        |                          |        |                              |        |                     |
| ≤12.5%                                    | 137                        | (31.7) | 378                      | (29.3) | 515                          | (29.9) | 0.15                |
| 12.5-25%                                  | 107                        | (24.8) | 380                      | (29.5) | 487                          | (28.3) |                     |
| 25.1-50%                                  | 126                        | (29.2) | 359                      | (27.9) | 485                          | (28.2) |                     |
| >50%                                      | 27                         | (6.2)  | 111                      | (8.6)  | 138                          | (8.0)  |                     |
| Missing data                              | 35                         | (8.1)  | 60                       | (4.7)  | 95                           | (5.5)  |                     |
| <b>Mode of detection, n (%)</b>           |                            |        |                          |        |                              |        |                     |
| Screening                                 | 203                        | (47.0) | 709                      | (55.0) | 912                          | (53.0) | 0.024               |
| LUTS                                      | 145                        | (33.6) | 377                      | (29.3) | 522                          | (30.3) |                     |
| Other symptoms                            | 64                         | (14.8) | 160                      | (12.4) | 224                          | (13.0) |                     |
| Missing data                              | 20                         | (4.6)  | 42                       | (3.3)  | 62                           | (3.6)  |                     |
| <b>Treatment according to NPCR, n (%)</b> |                            |        |                          |        |                              |        |                     |
| AS                                        | 202                        | (46.8) | 476                      | (37.0) | 678                          | (39.4) | 0.002               |
| RP                                        | 187                        | (43.3) | 660                      | (51.2) | 847                          | (49.2) |                     |
| RT                                        | 43                         | (10.0) | 152                      | (11.8) | 195                          | (11.3) |                     |
